# Supplementary material
Source: ML conference proceedings conference paper supplement (https://openreview.net/forum?id=855yo1Ubt2)

Figure 1 is a line graph showing the performance of various active learning methods on the MNIST dataset. The x-axis represents the 'No. of labeled examples' (ranging from 20 to 120), and the y-axis represents accuracy (ranging from 0.7 to 0.95). The methods compared are Uniform, US, BALD, QBC, Core-Set, Graph, Hier, HintSVM, QUIRE, DWUS, MCM, ALBL, and LAL. The graph shows that most methods converge to an accuracy of approximately 0.9 as the number of labeled examples increases. LAL and ALBL generally show the highest accuracy, while DWUS shows the lowest accuracy for a given number of labeled examples.

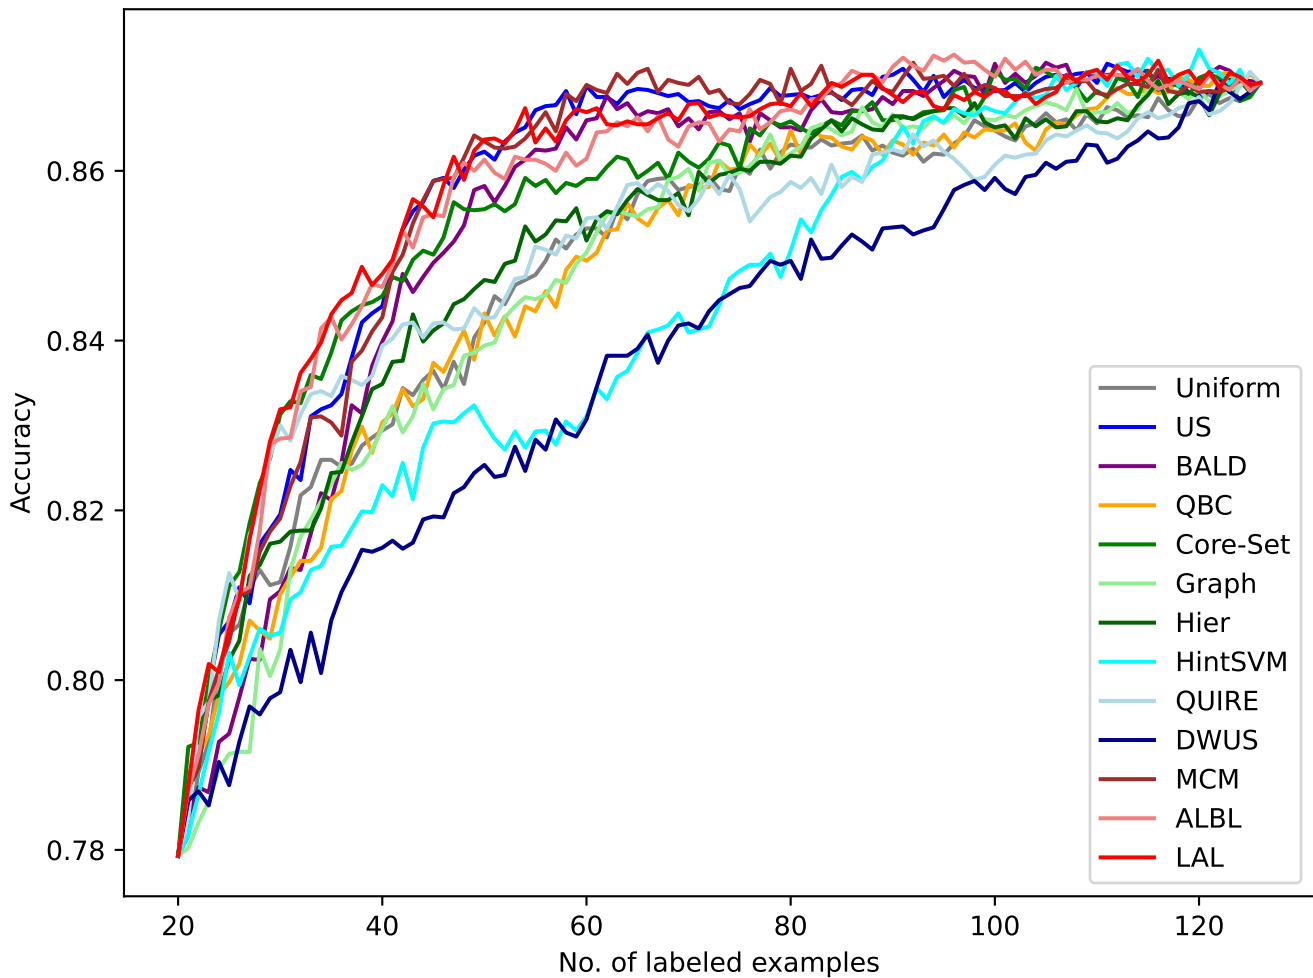

Supplement: supplementary_material [file attachment]
