# Supplementary material (part 1 of 4)
Source: ML conference proceedings conference paper supplement (https://openreview.net/forum?id=855yo1Ubt2)

Learning curves on Phoneme

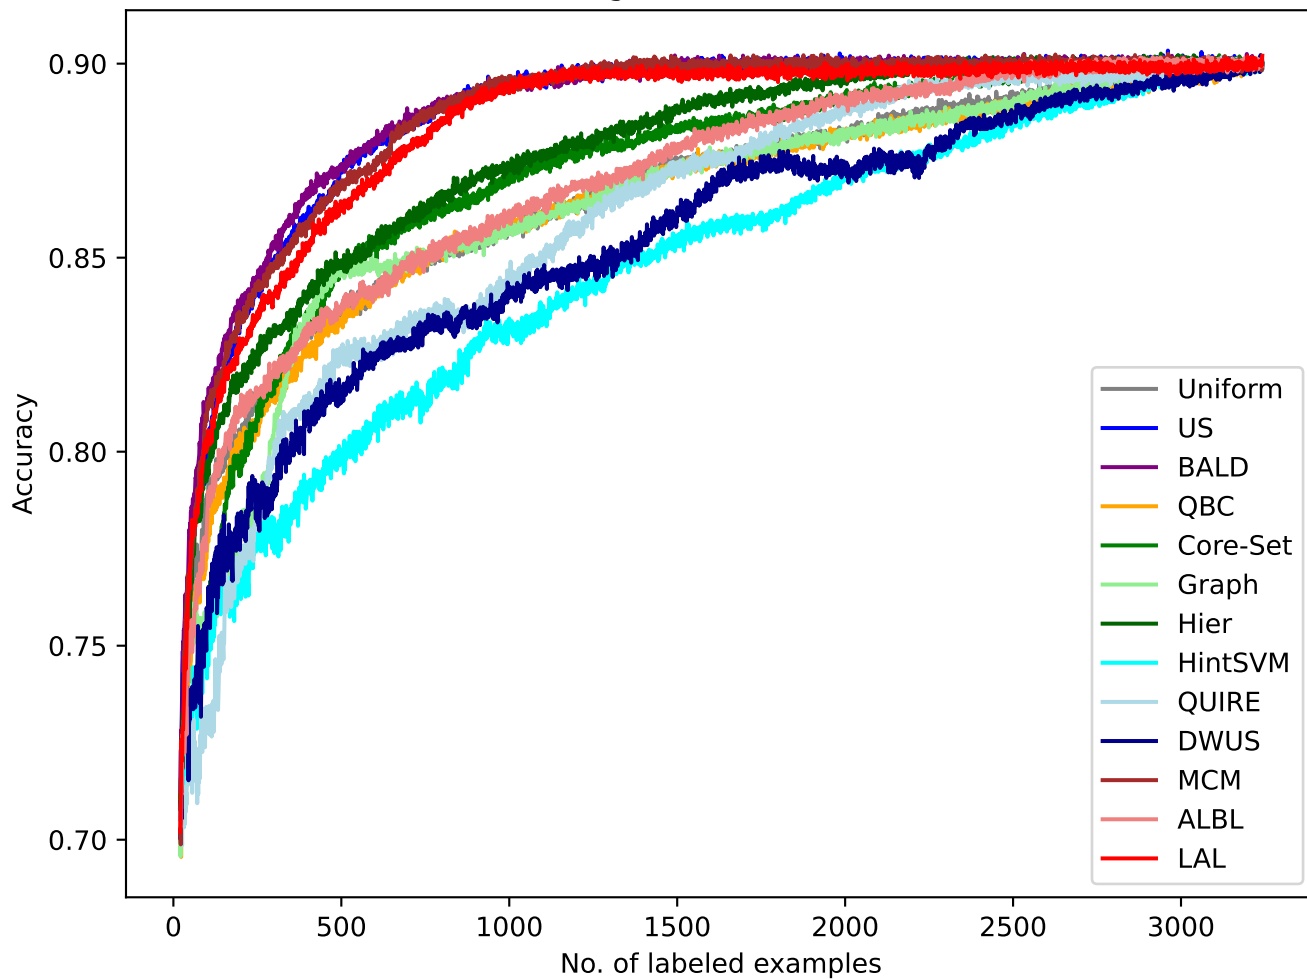

Supplement: supplementary_material [file attachment]

Learning curves on Sonar

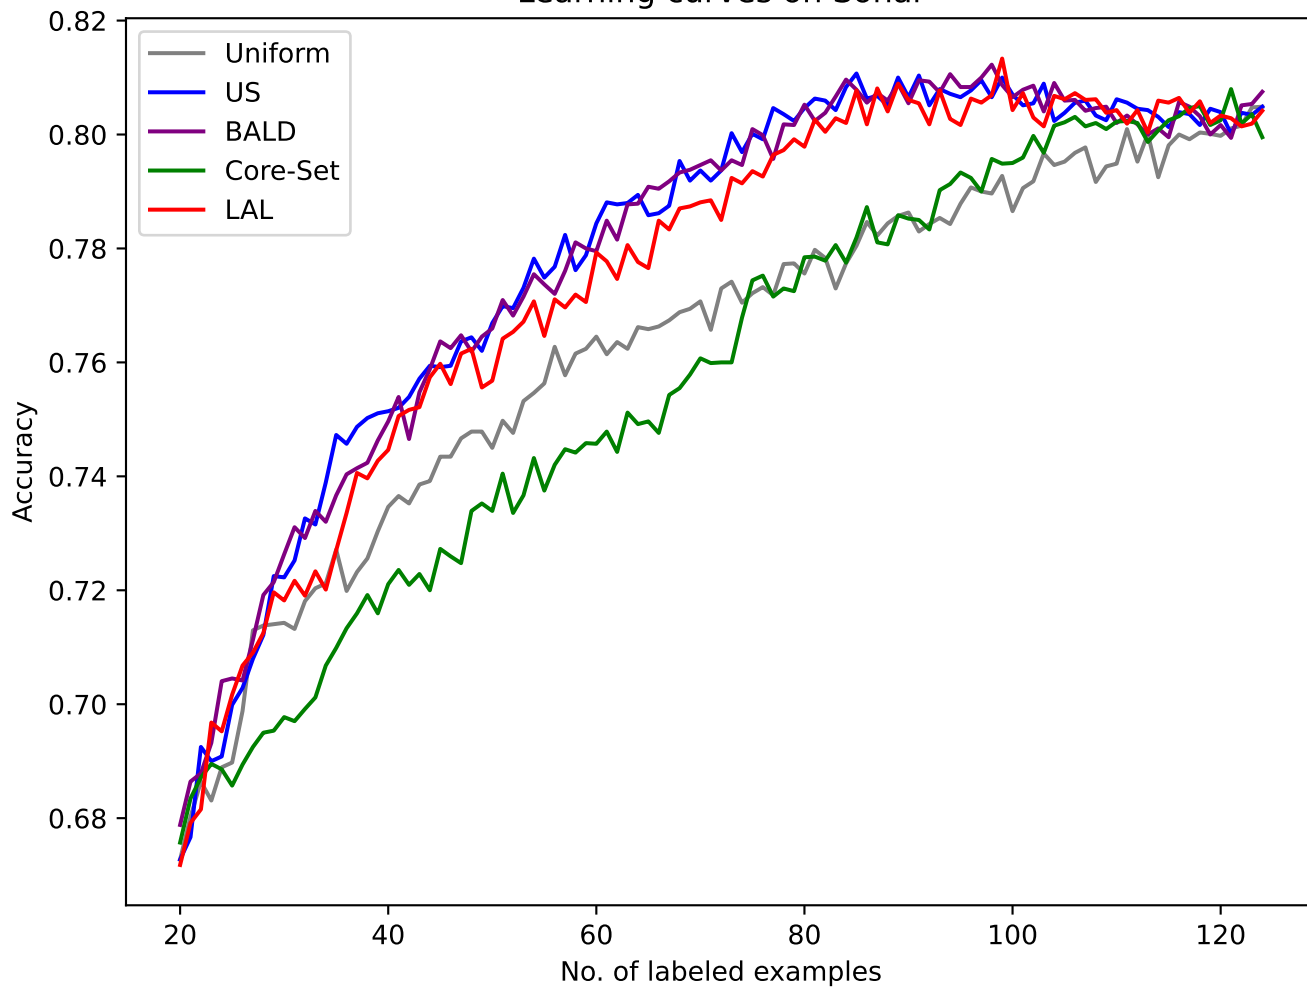

Supplement: supplementary_material [file attachment]

Difference of accuracy on Haberman

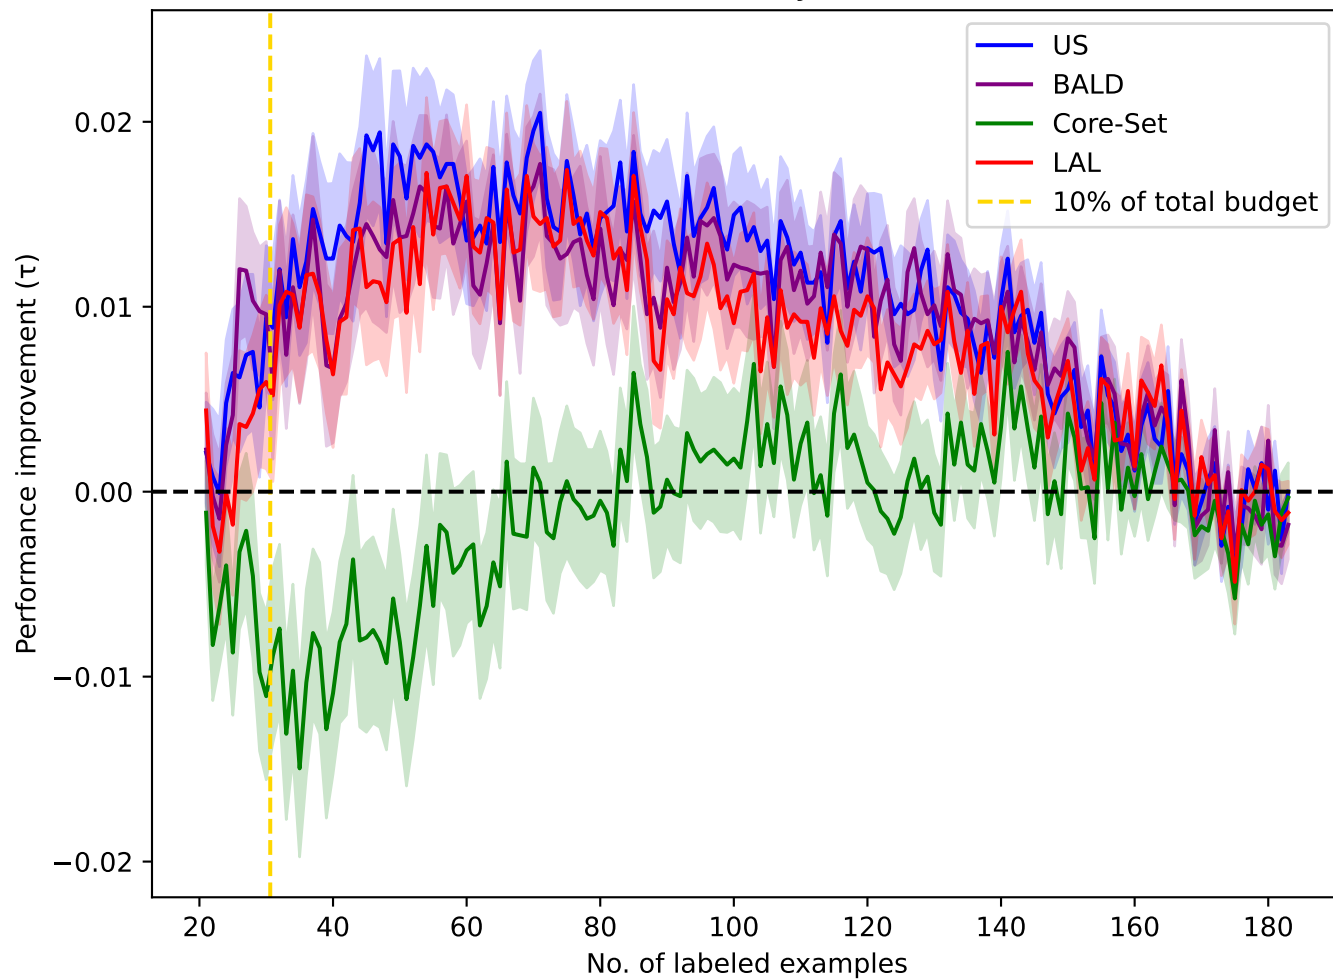

Supplement: supplementary_material [file attachment]

Learning curves on Bioresponse

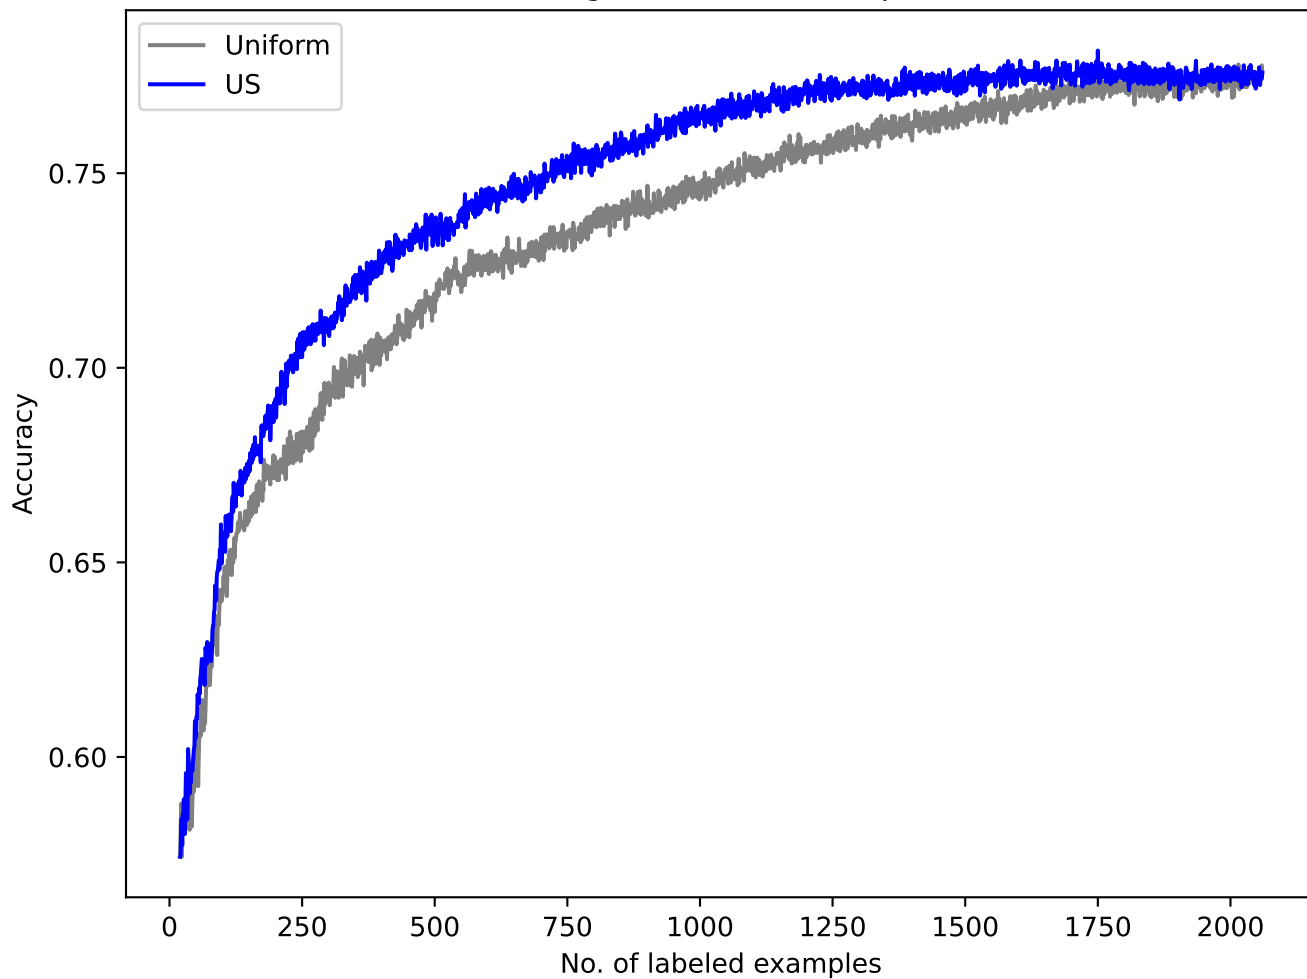

Supplement: supplementary_material [file attachment]

Difference of accuracy on Australian

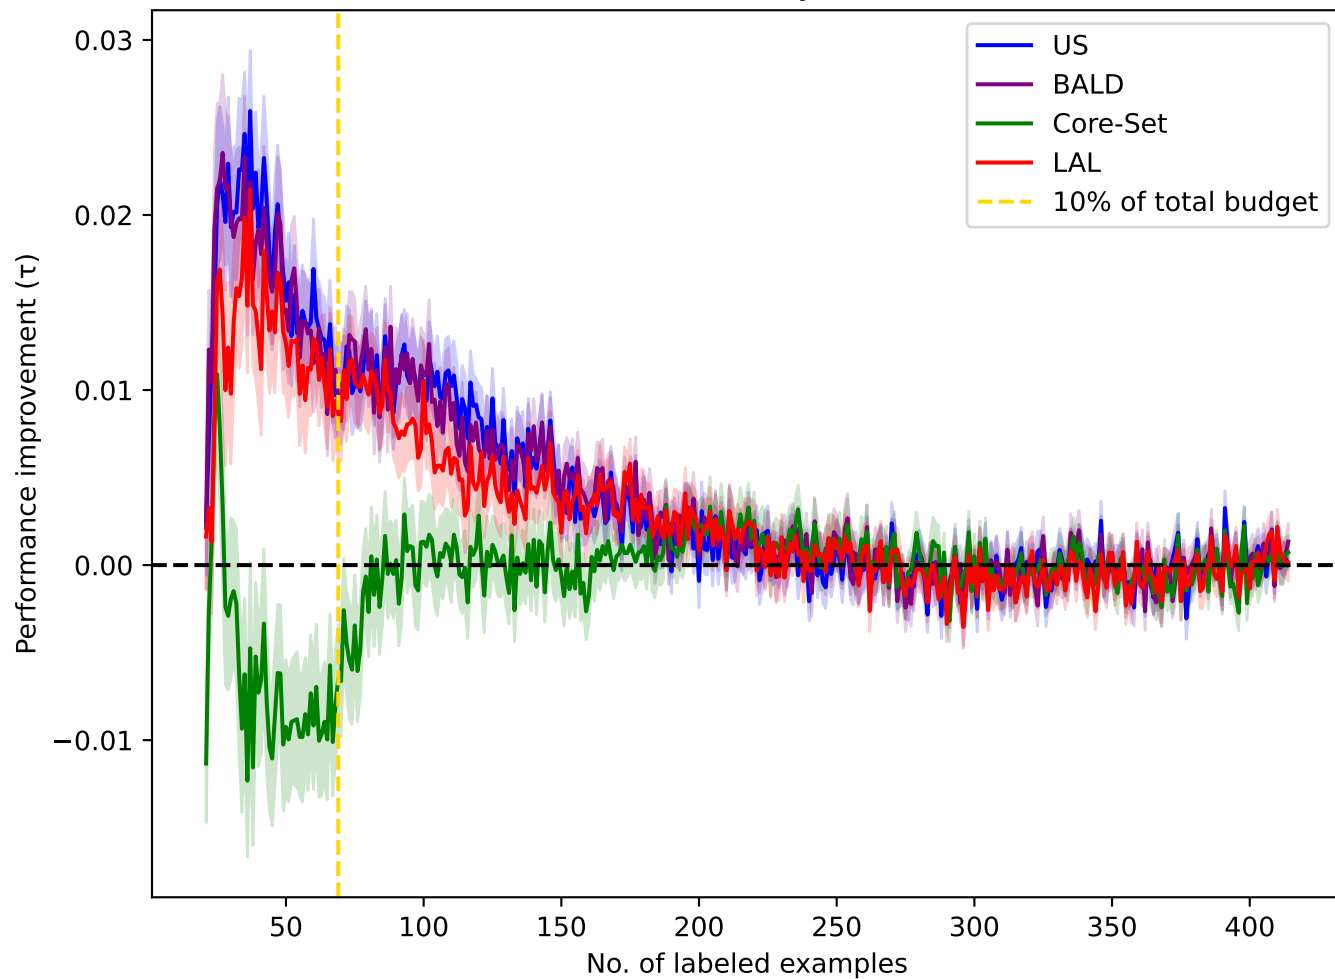

Supplement: supplementary_material [file attachment]

Difference of accuracy on Bioresponse

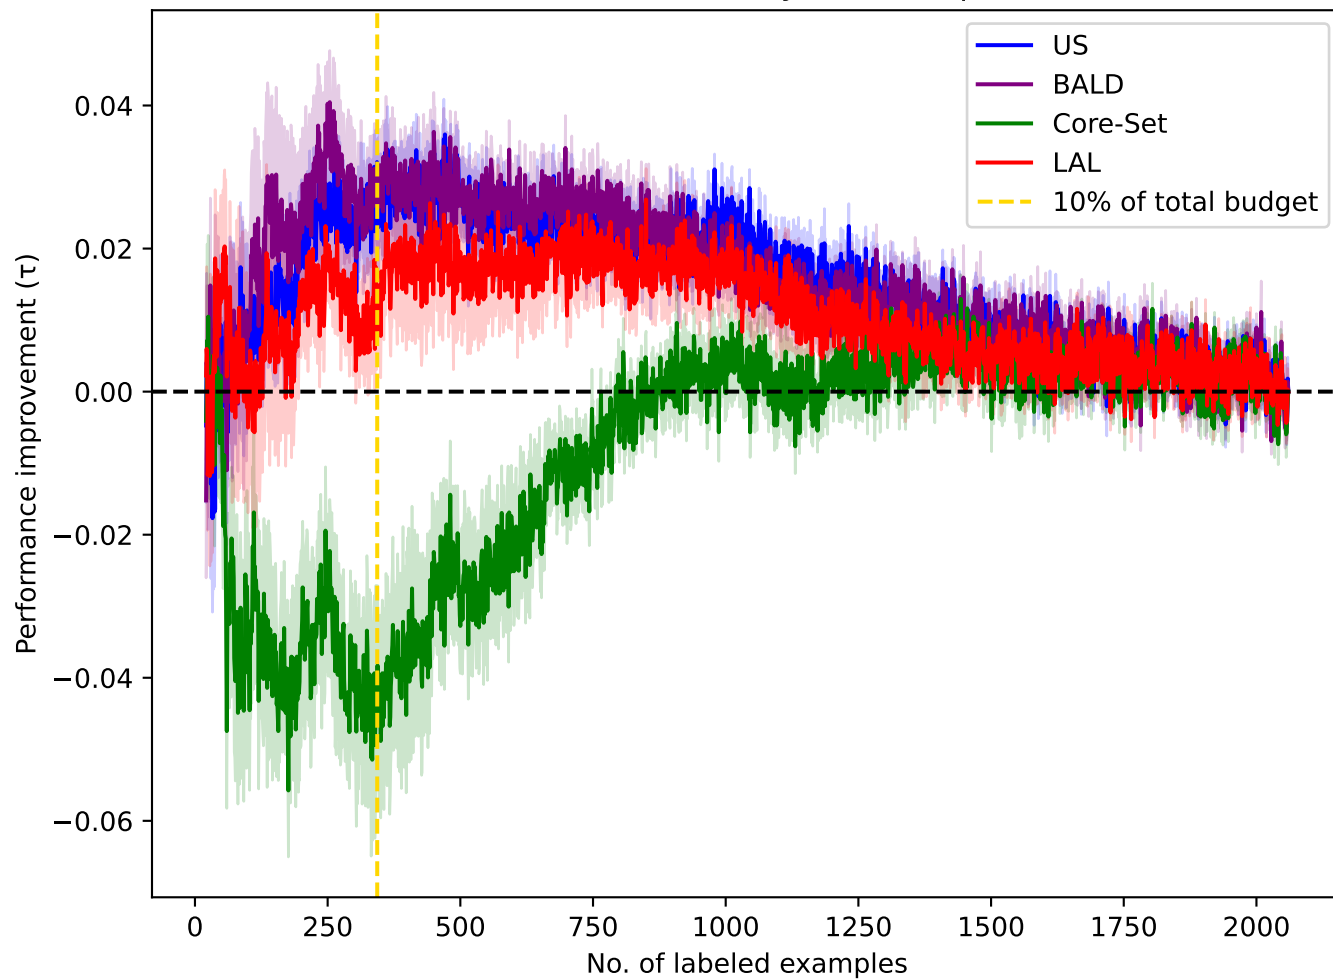

Supplement: supplementary_material [file attachment]

Learning curves on Australian

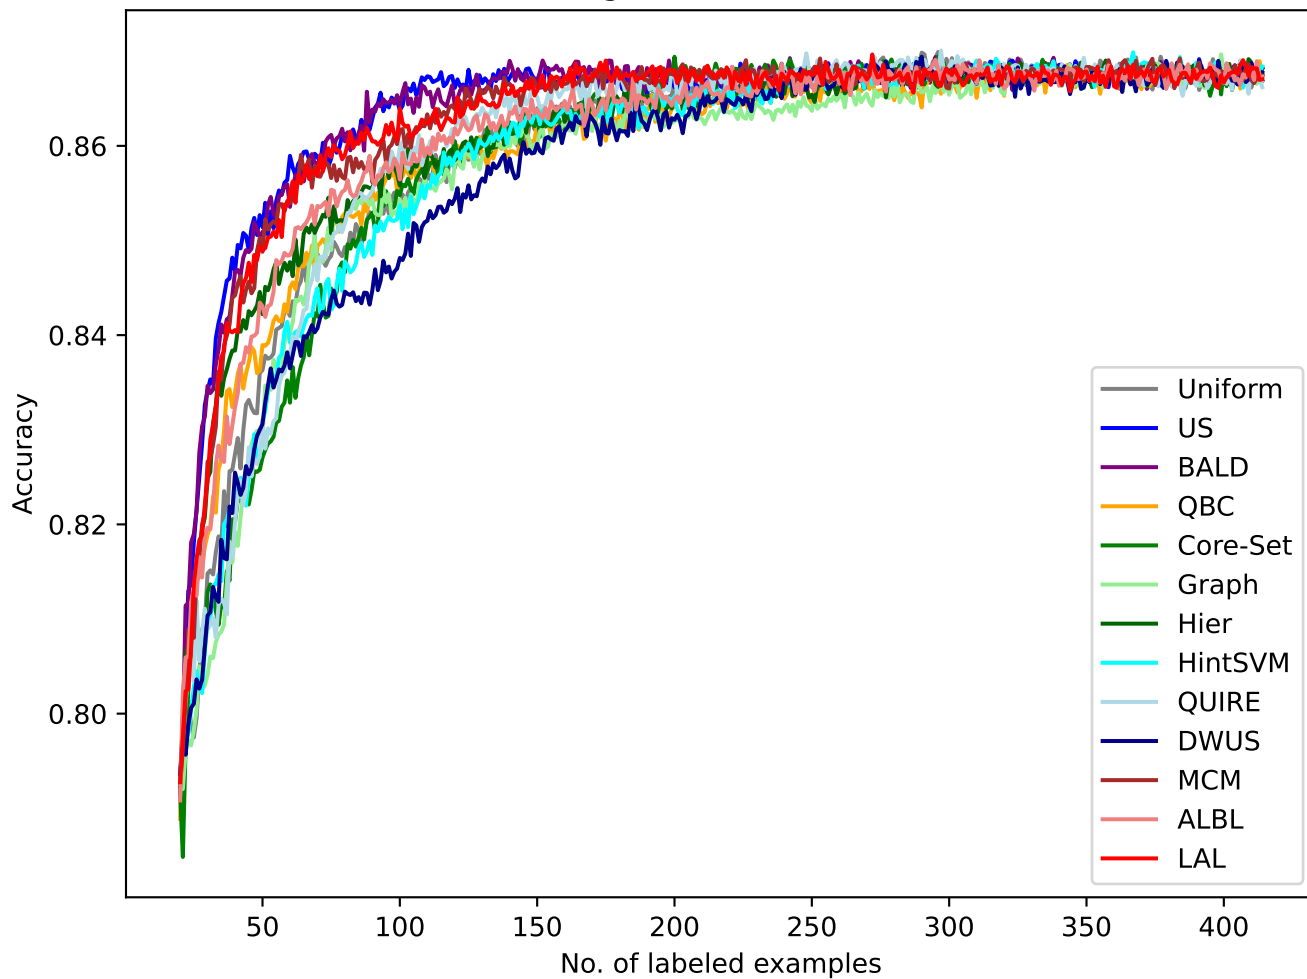

Supplement: supplementary_material [file attachment]

Learning curves with 95% C.I. on Mammographic

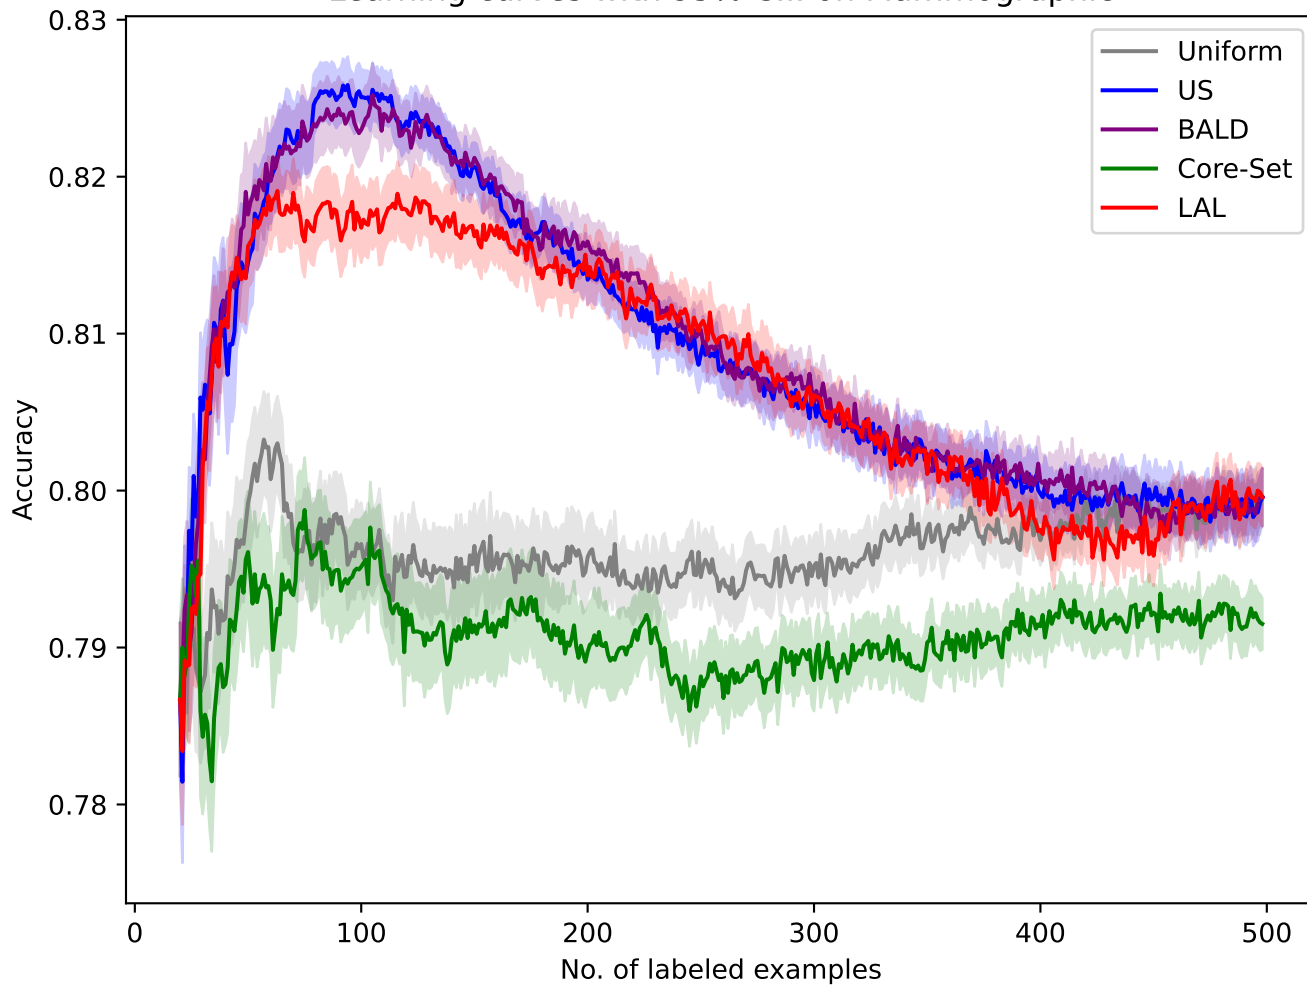

Supplement: supplementary_material [file attachment]

Query strategy aspect

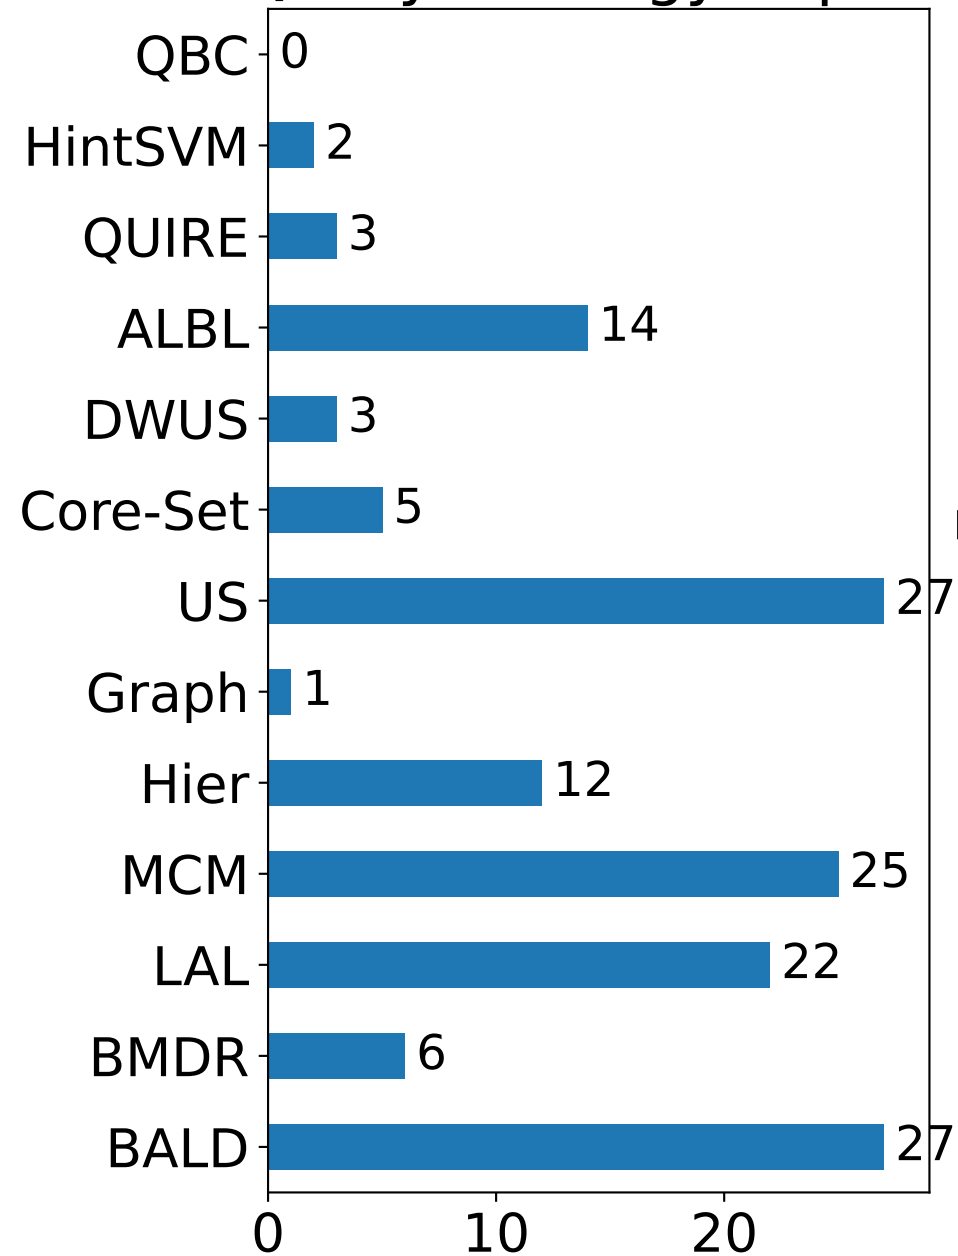

Dataset aspect

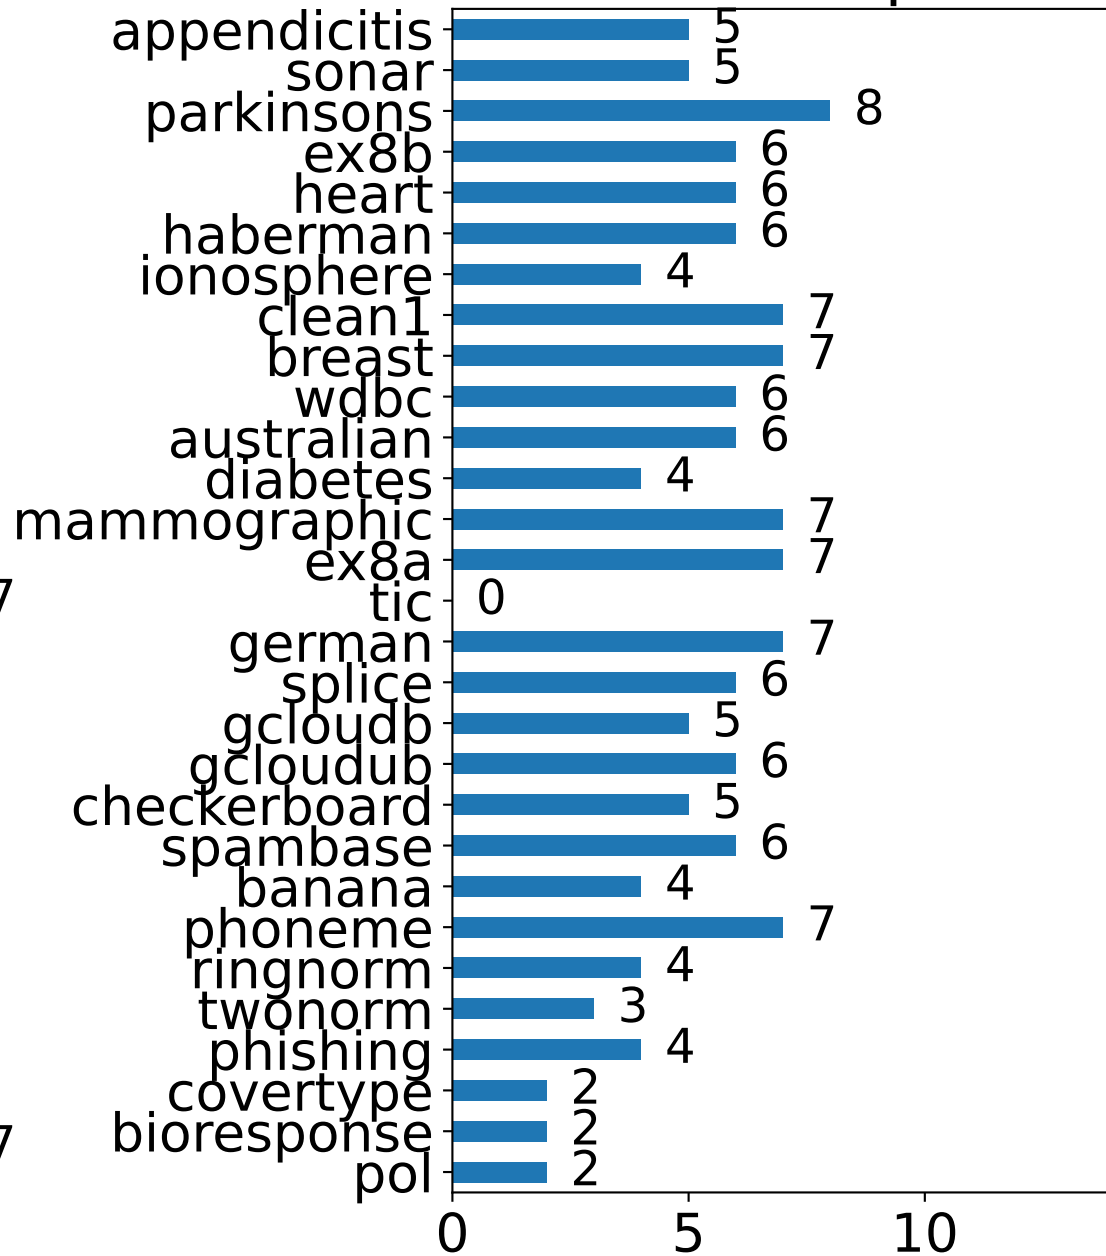

Supplement: supplementary_material [file attachment]

Difference of accuracy on Breast

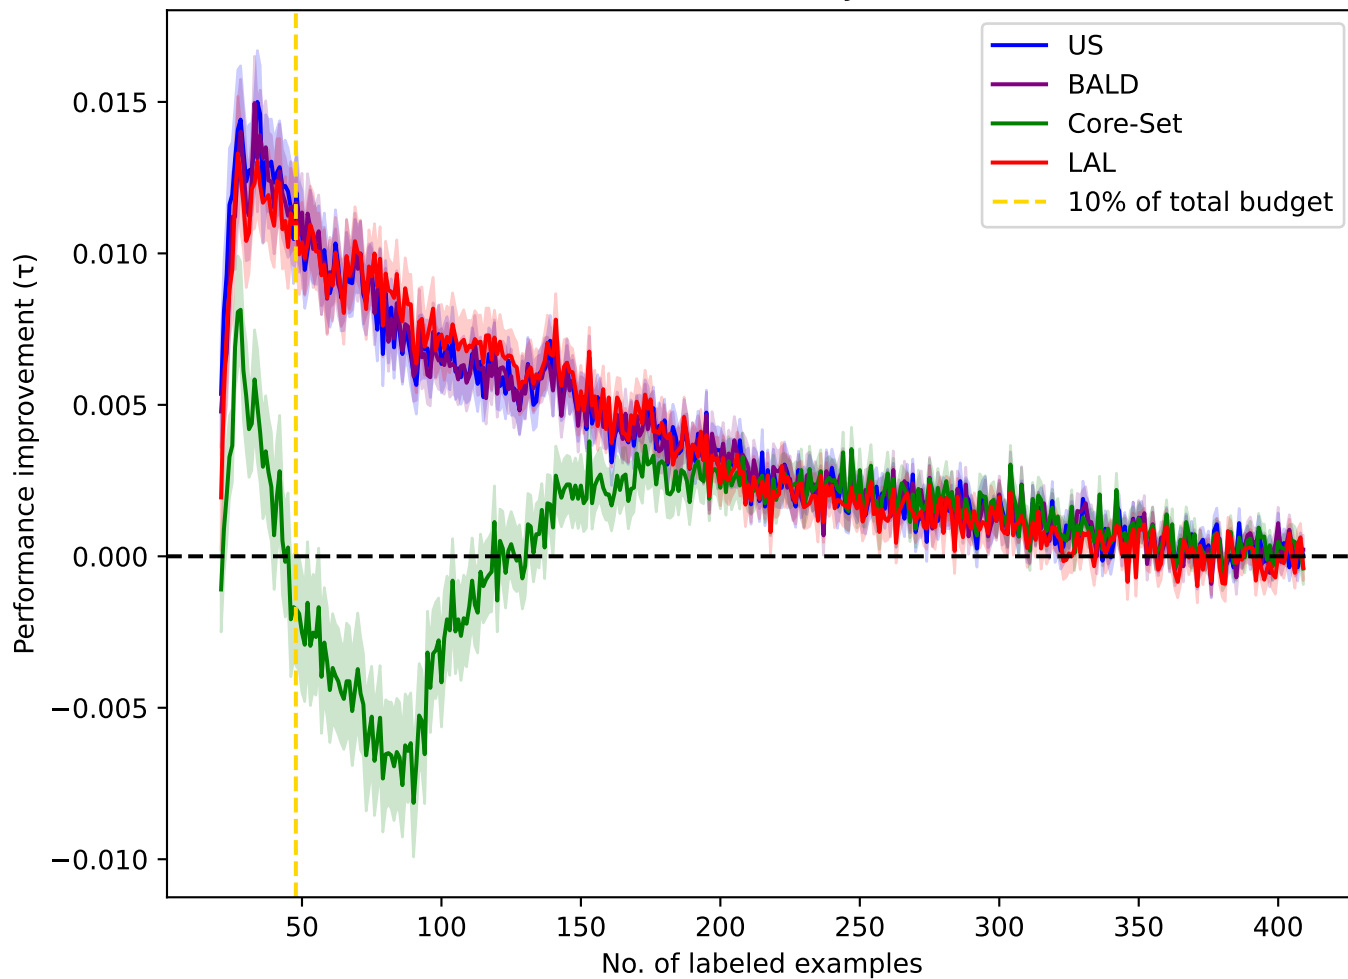

Supplement: supplementary_material [file attachment]

Learning curves on Banana

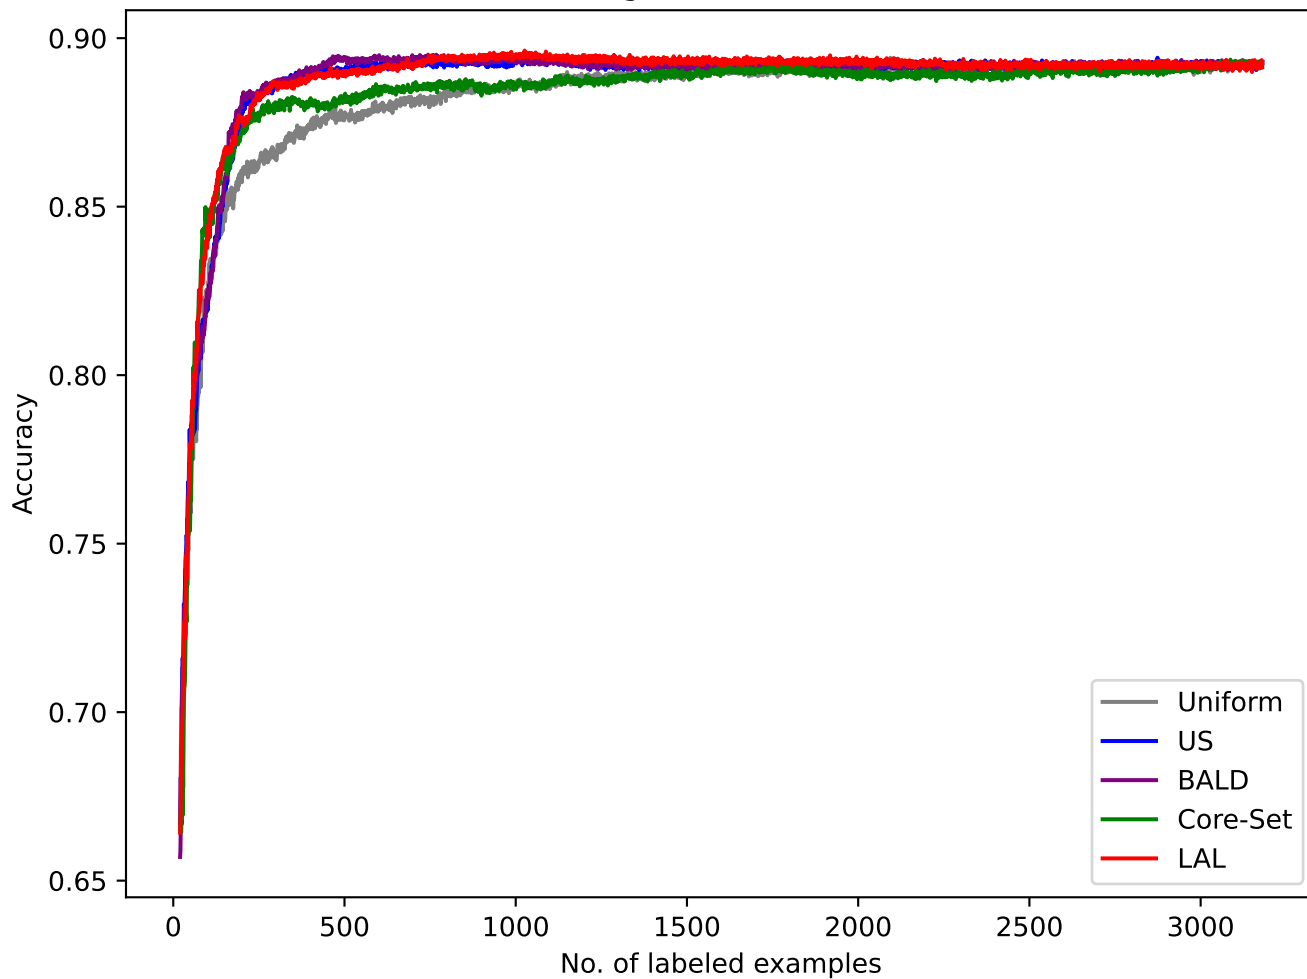

Supplement: supplementary_material [file attachment]

Difference of accuracy on Gcloudub

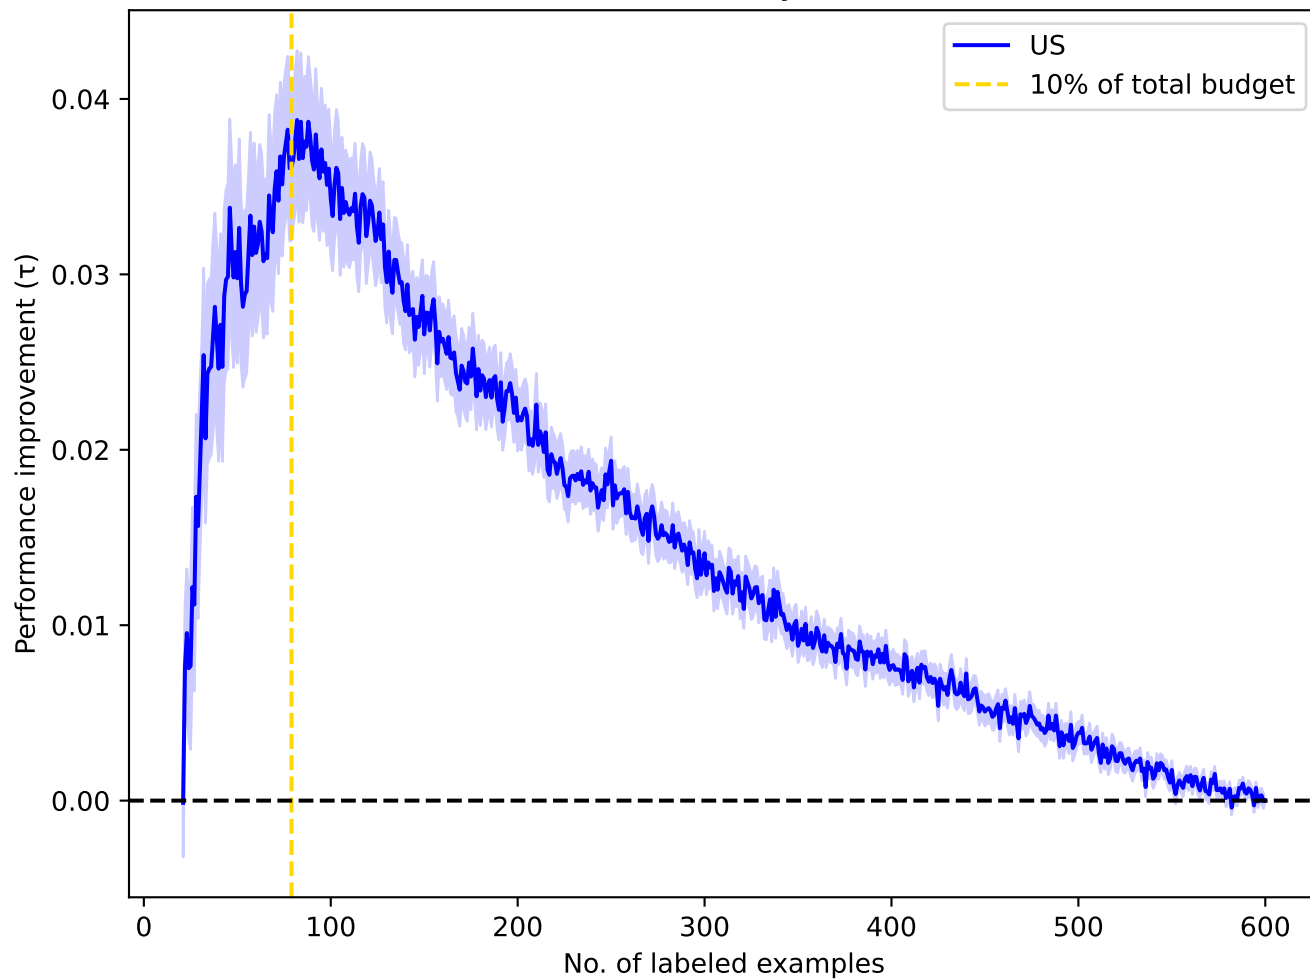

Supplement: supplementary_material [file attachment]

Learning curves with 95% C.I. on Appendicitis

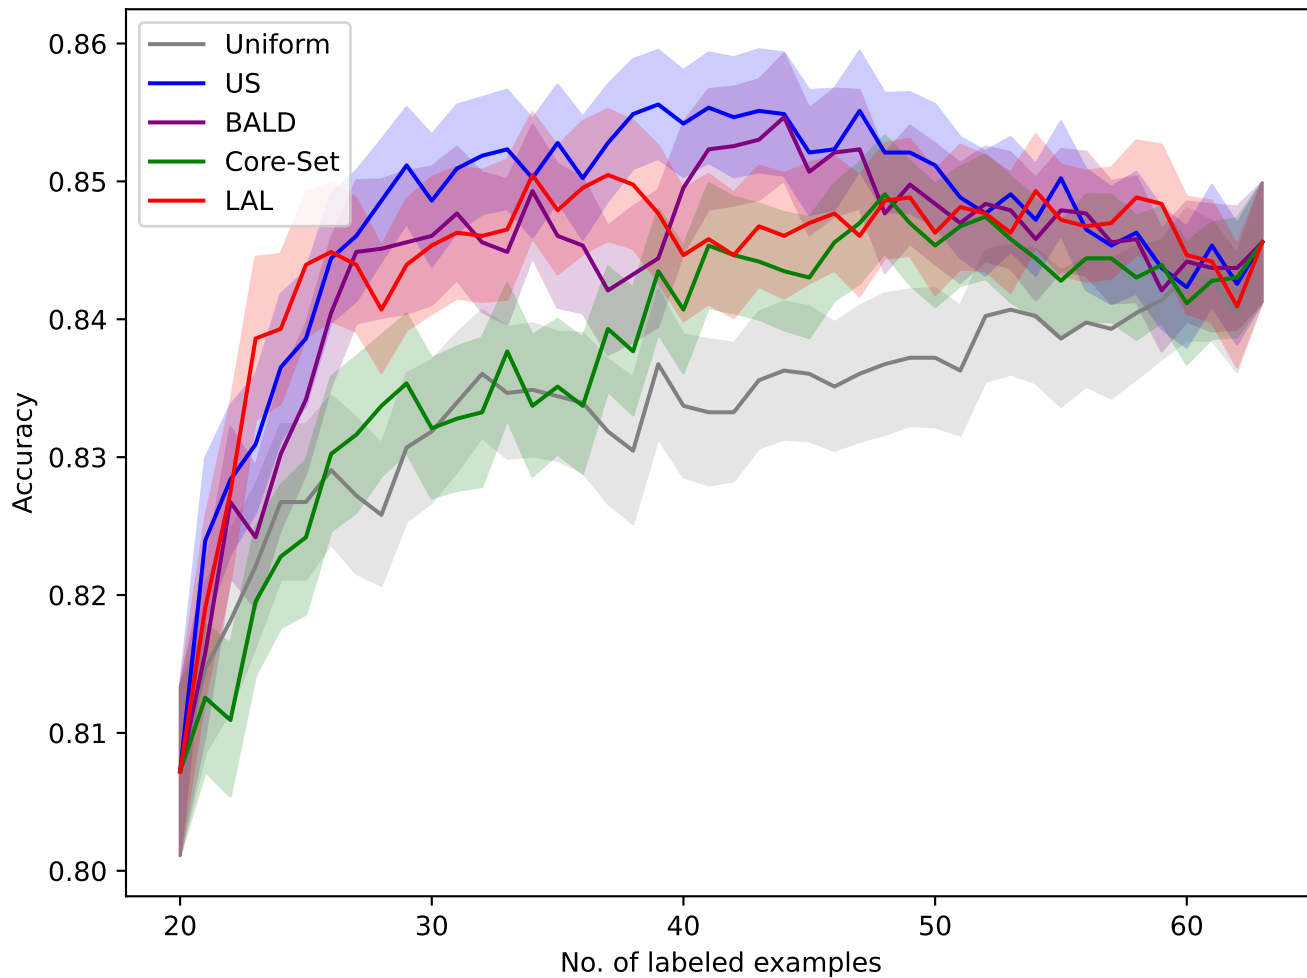

Supplement: supplementary_material [file attachment]

Learning curves with 95% C.I. on Phoneme

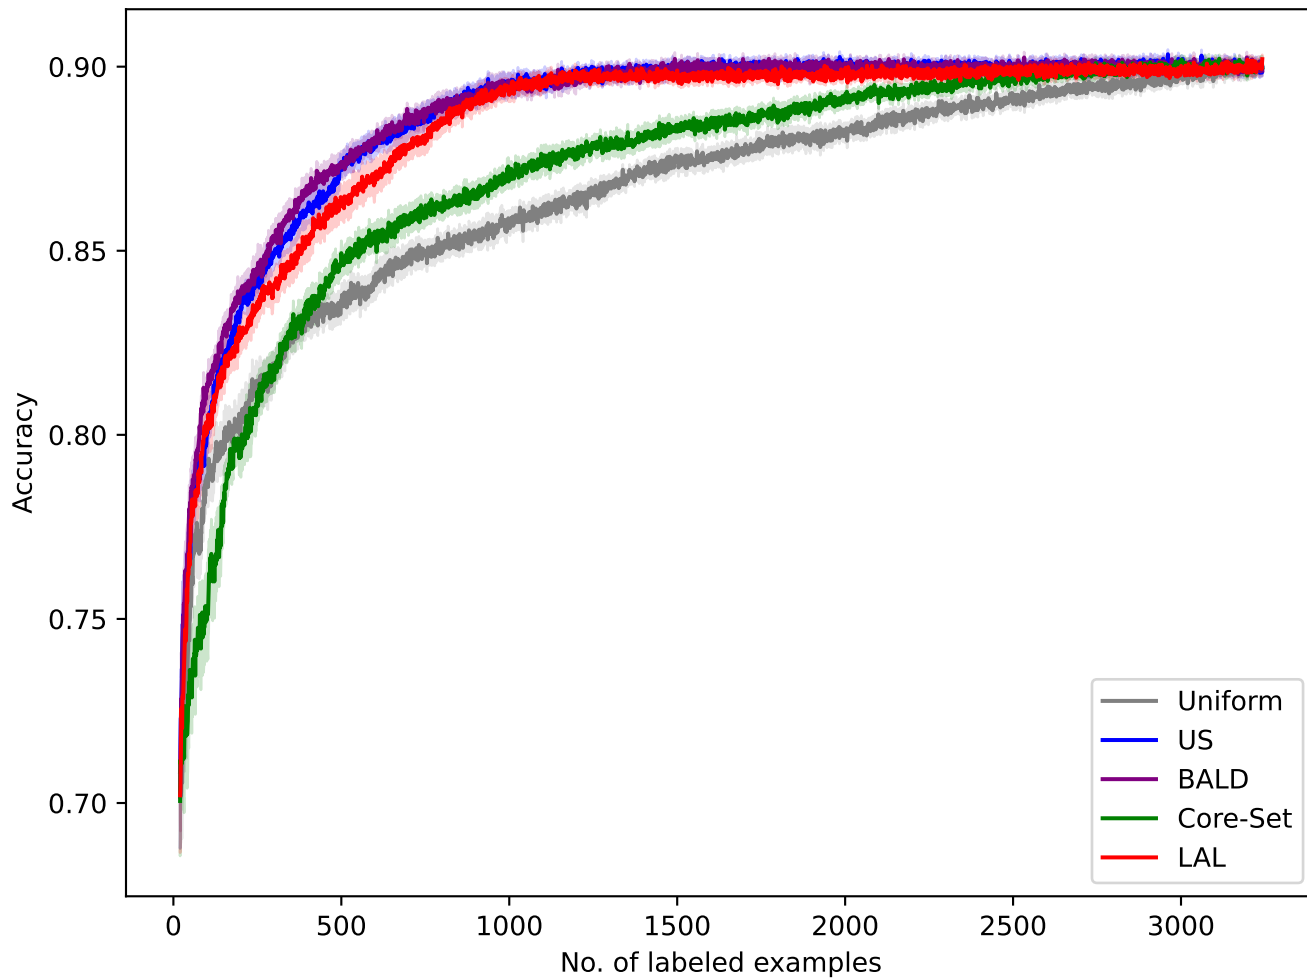

Supplement: supplementary_material [file attachment]

Difference of accuracy on Heart

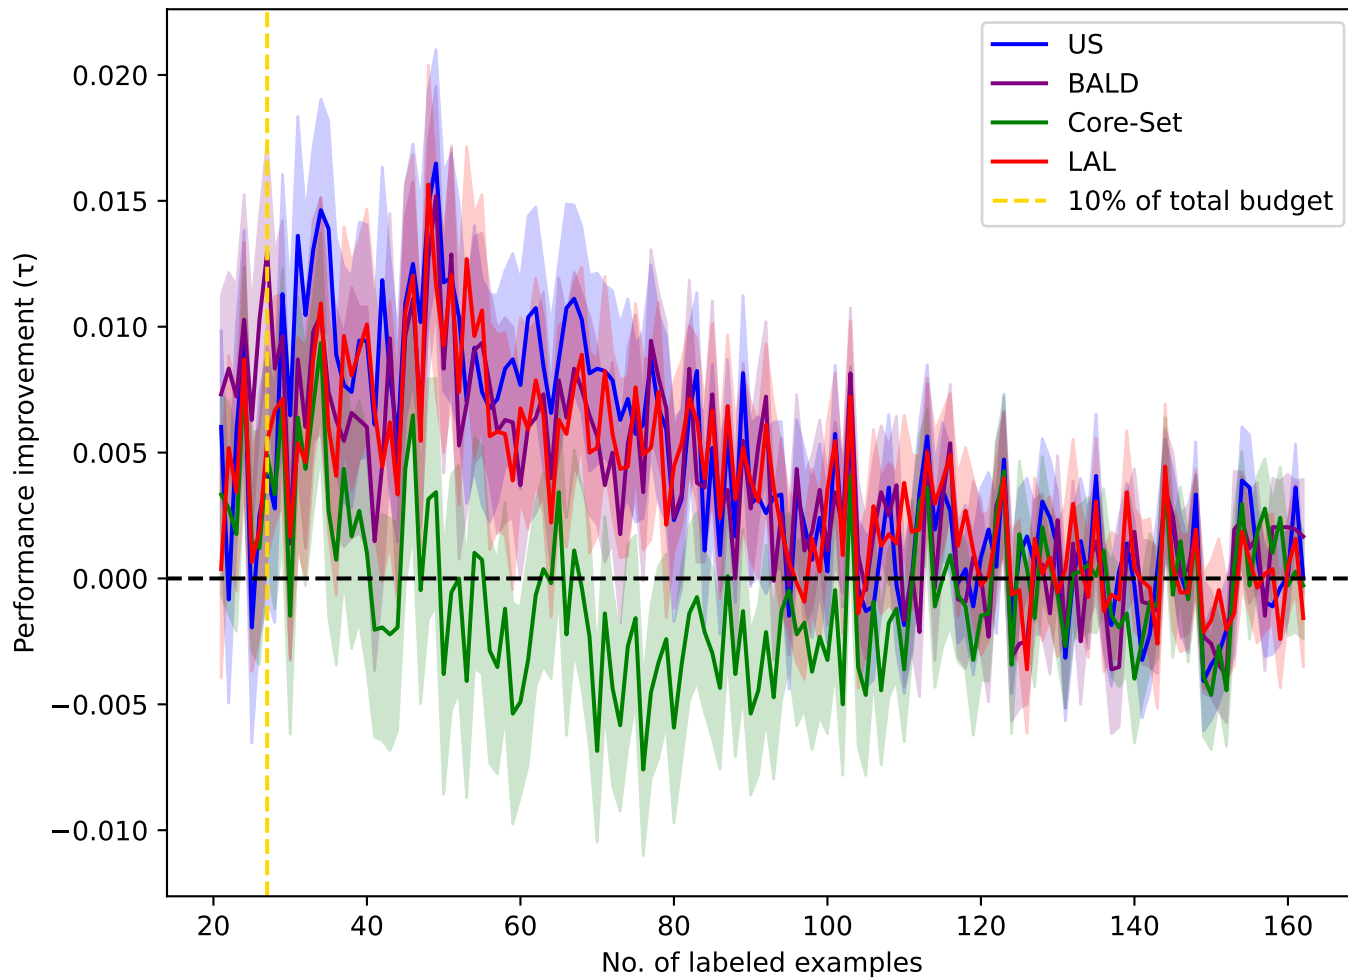

Supplement: supplementary_material [file attachment]

Learning curves with 95% C.I. on Ex8a

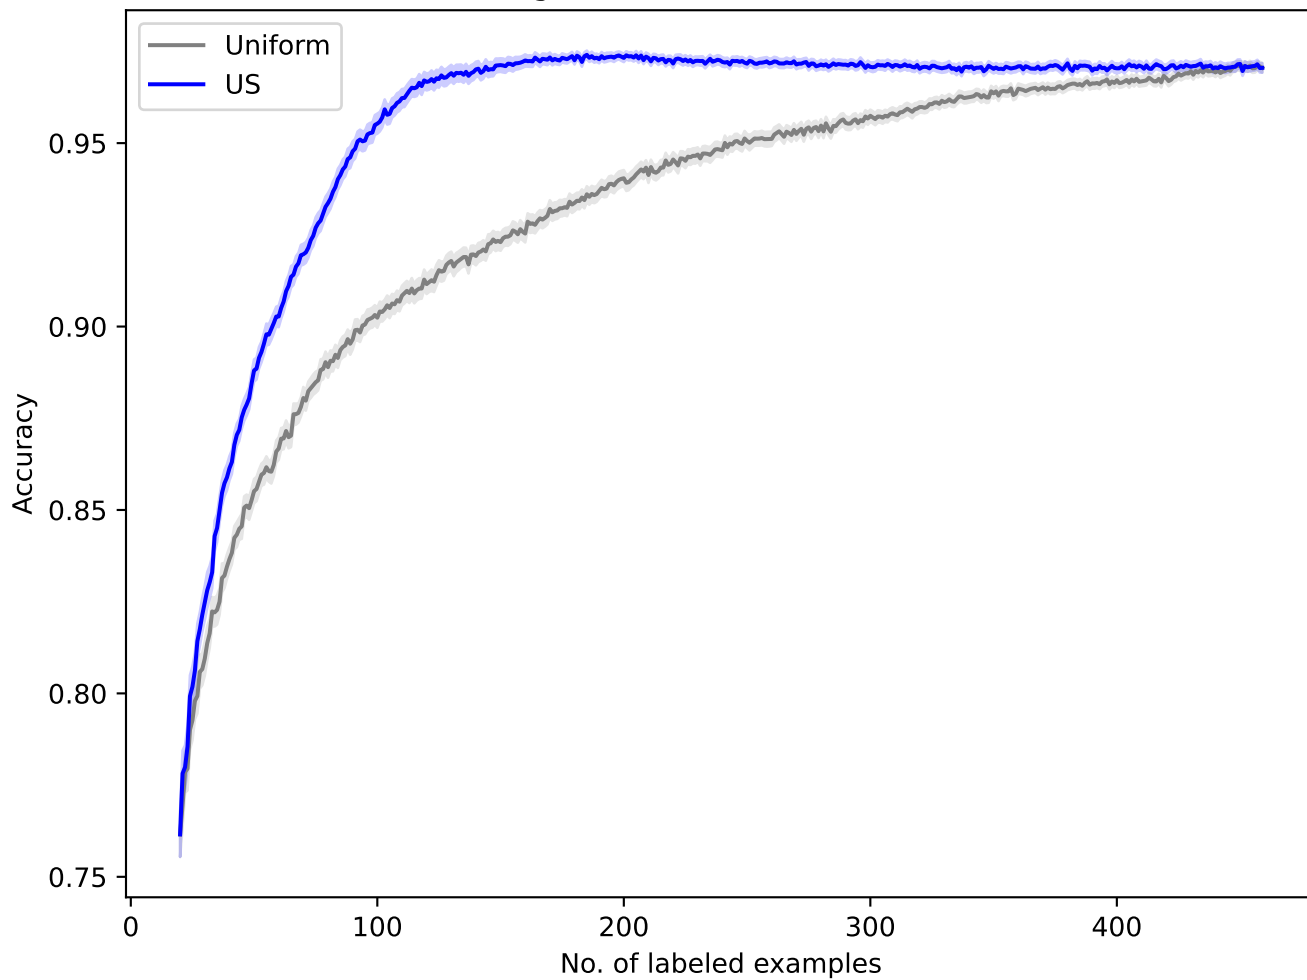

Supplement: supplementary_material [file attachment]

Learning curves on Heart

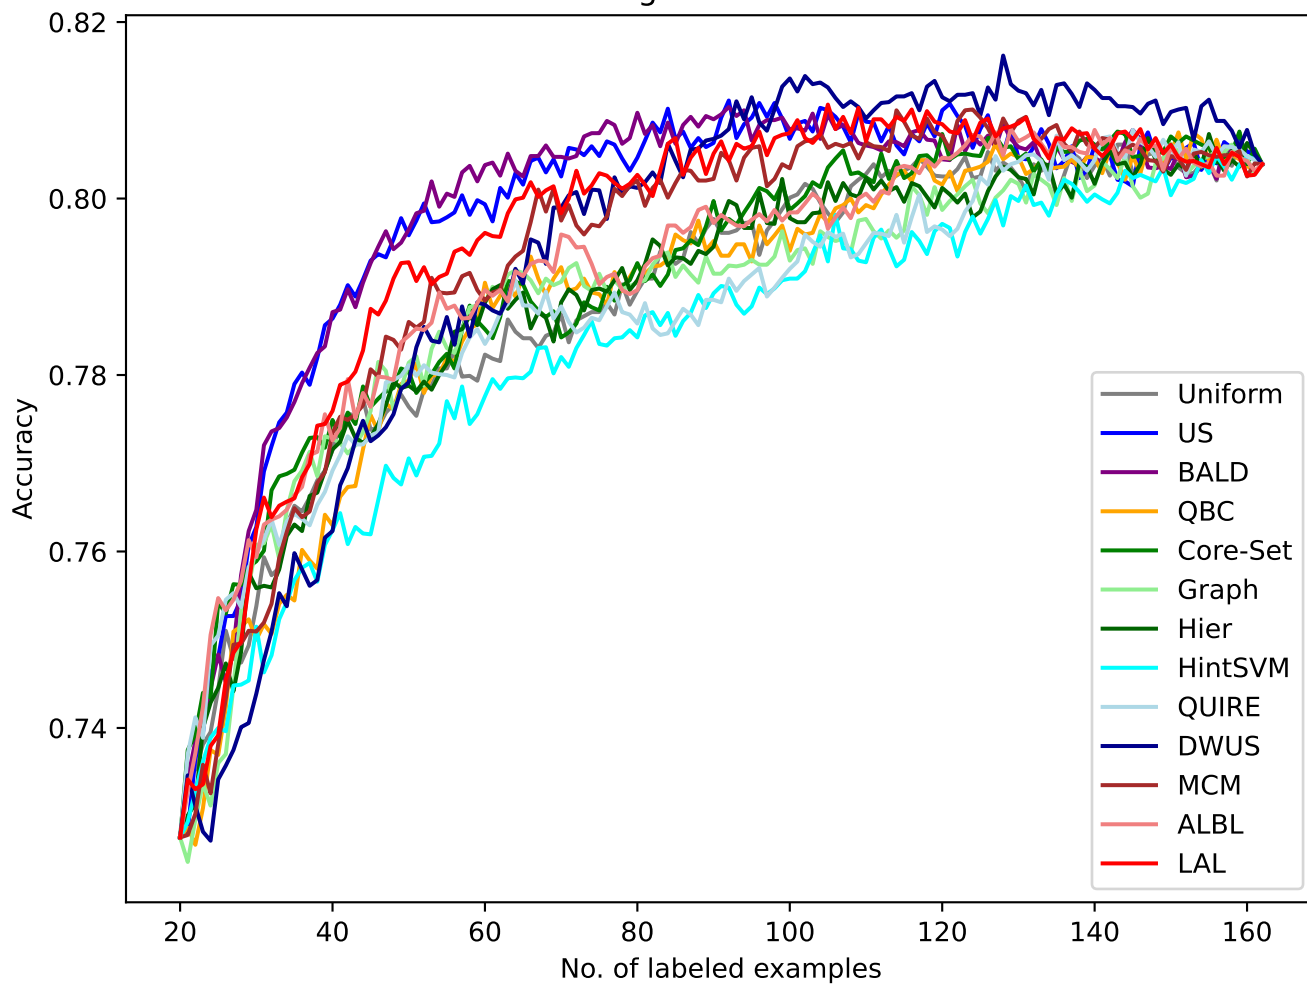

Supplement: supplementary_material [file attachment]

Learning curves on Diabetes

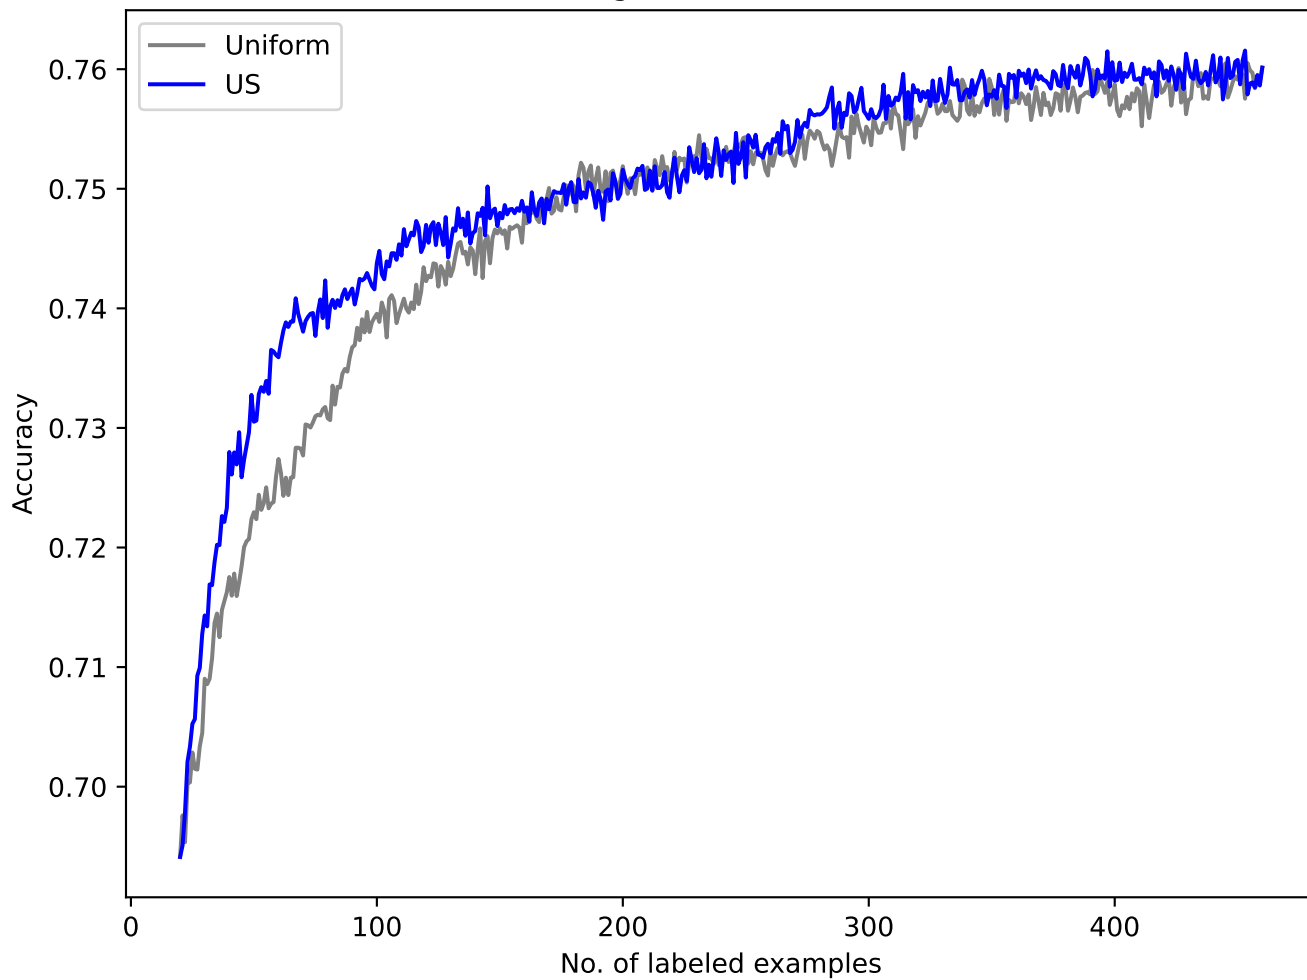

Supplement: supplementary_material [file attachment]

Difference of accuracy on Splice

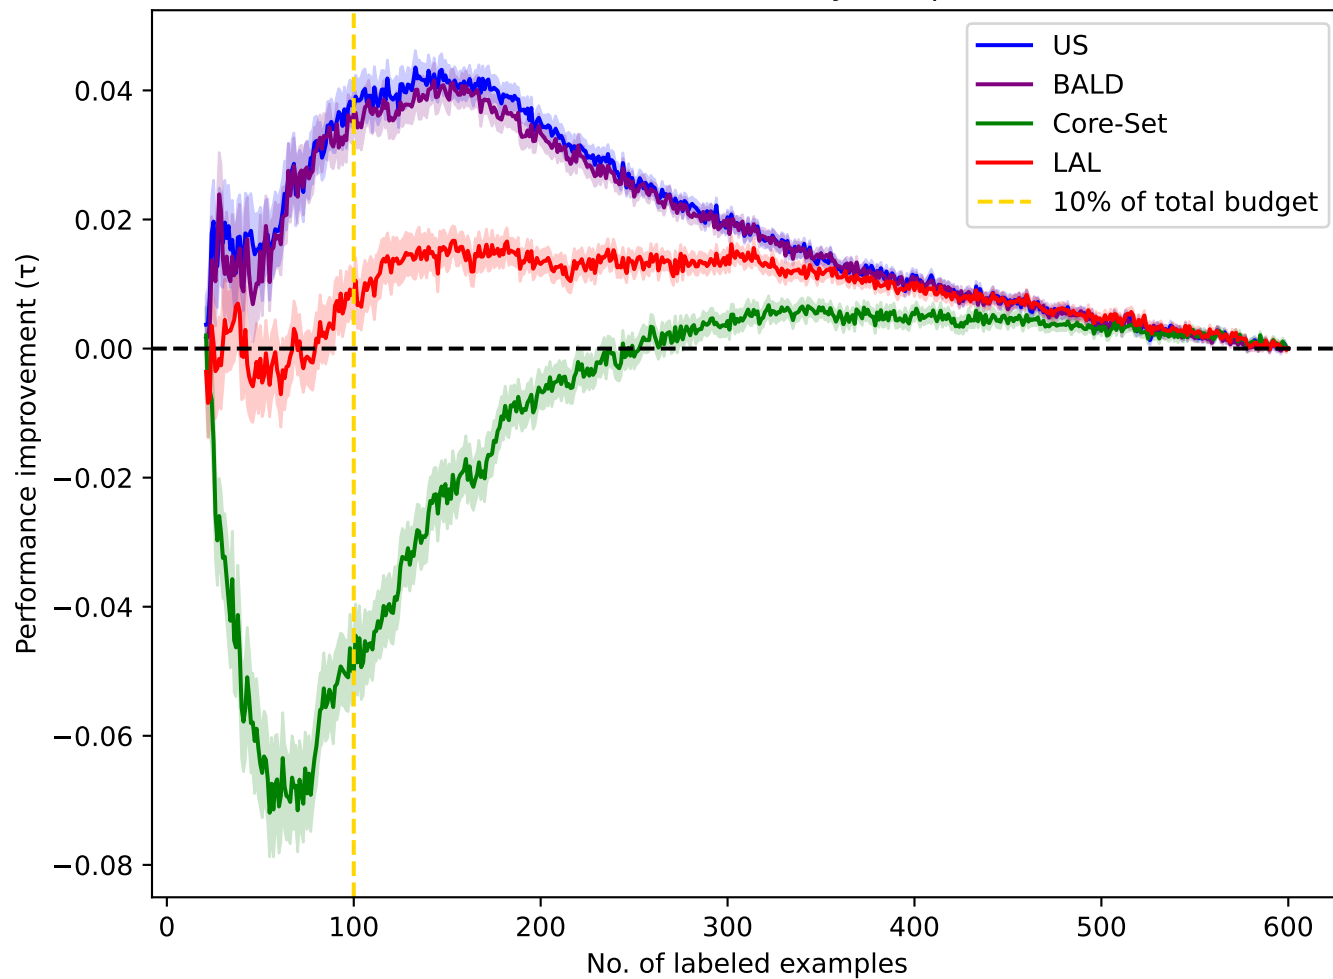

Supplement: supplementary_material [file attachment]

Learning curves on Appendicitis

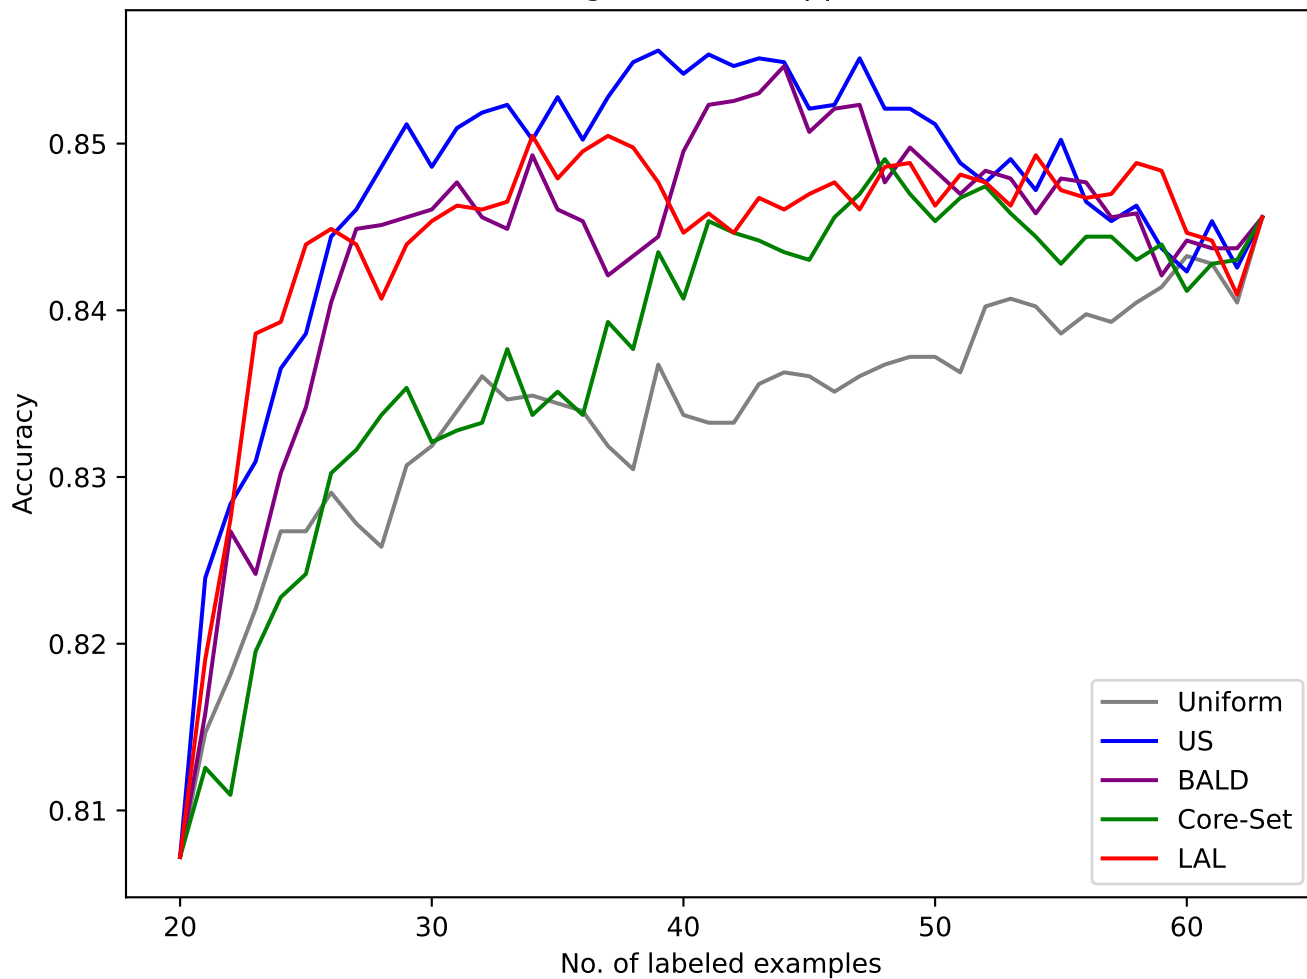

Supplement: supplementary_material [file attachment]

Learning curves on Ex8a

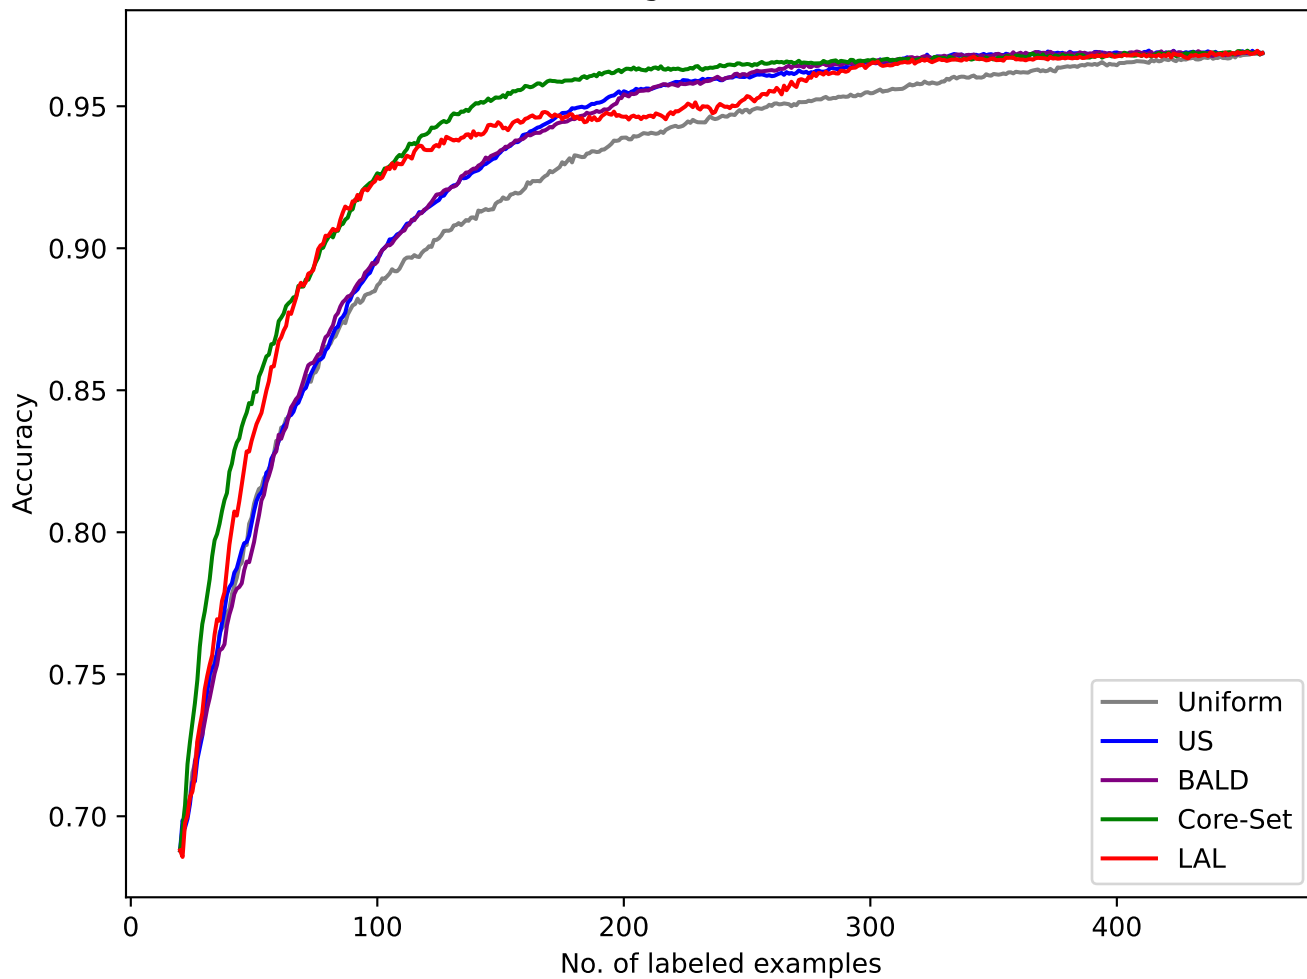

Supplement: supplementary_material [file attachment]

Learning curves with 95% C.I. on Clean1

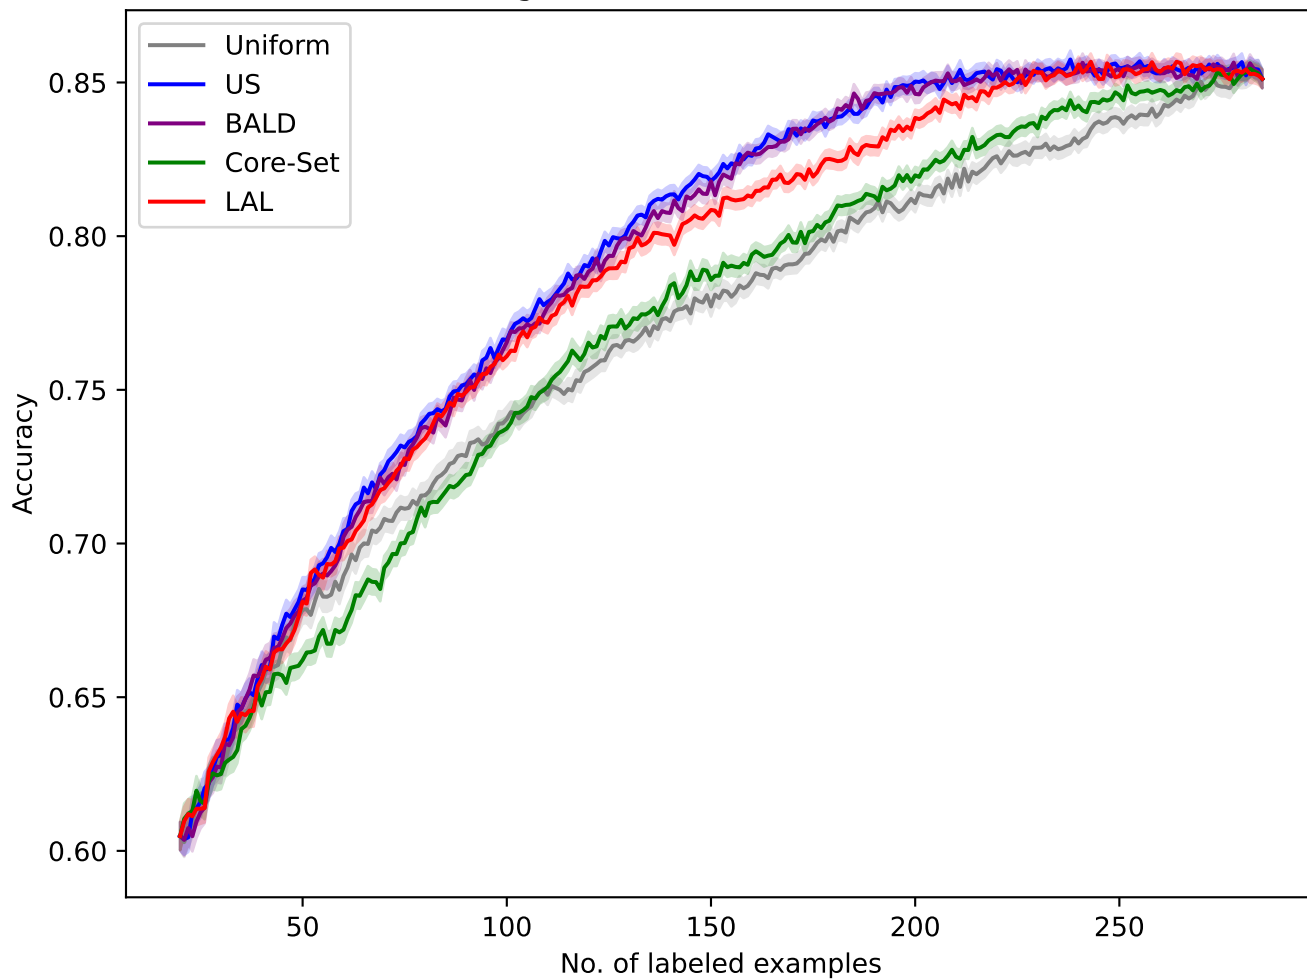

Supplement: supplementary_material [file attachment]

Learning curves with 95% C.I. on Bioresponse

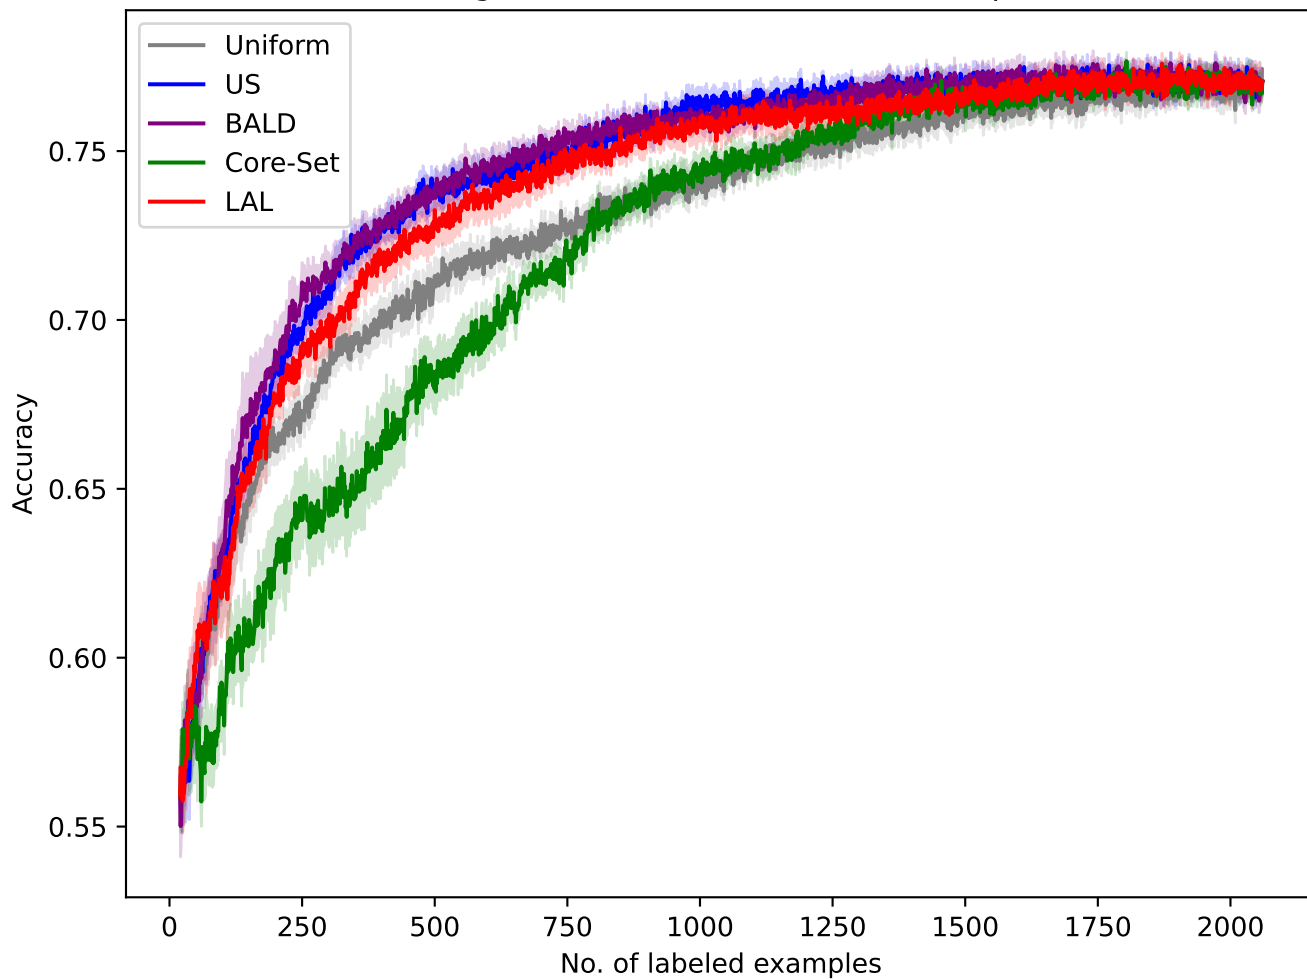

Supplement: supplementary_material [file attachment]

Learning curves with 95% C.I. on Checkerboard

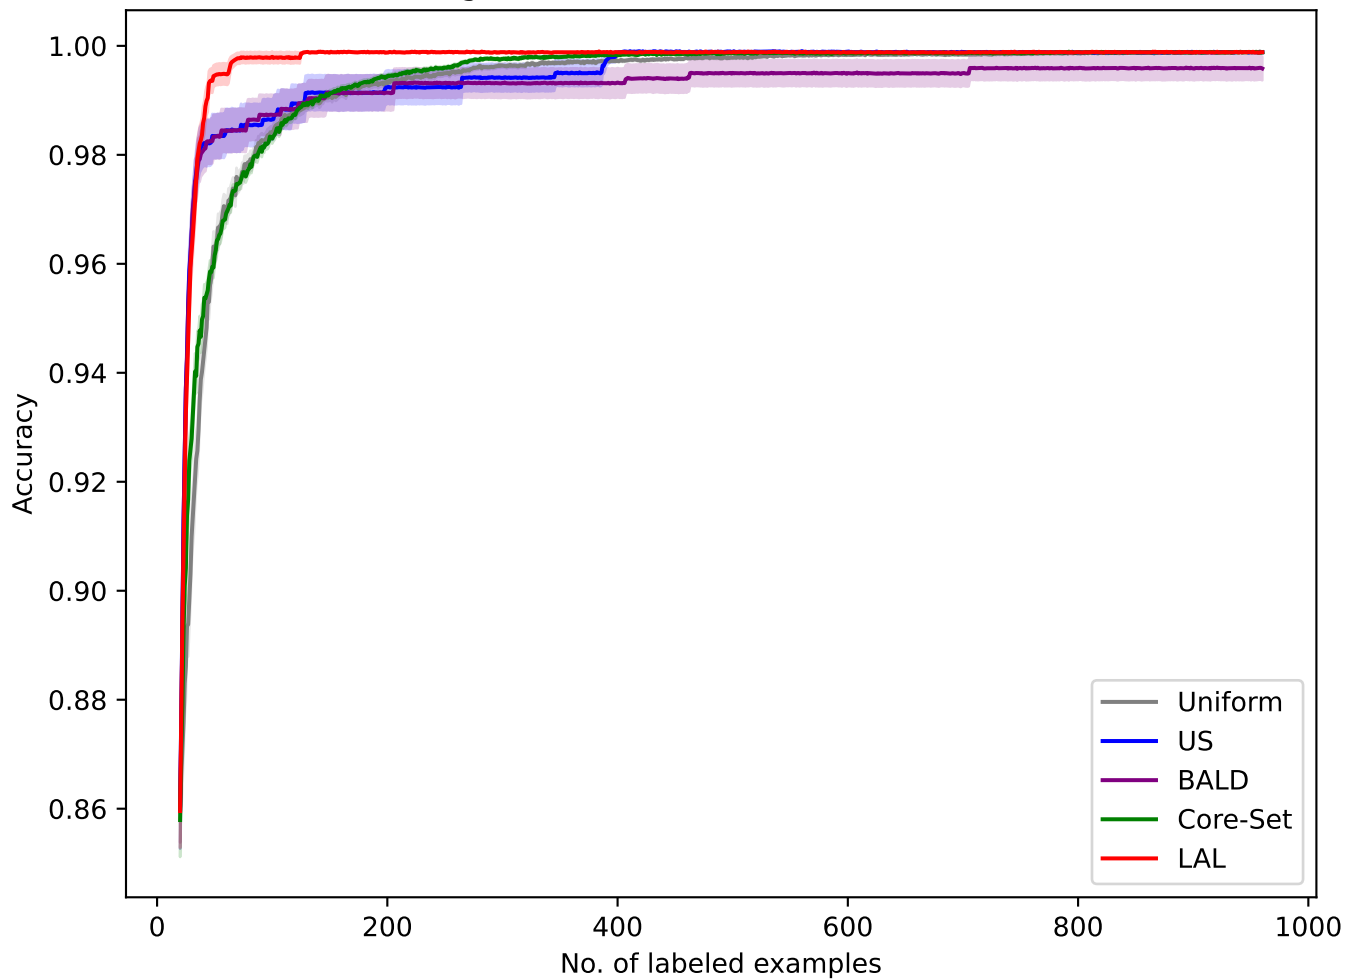

Supplement: supplementary_material [file attachment]

Learning curves on Heart

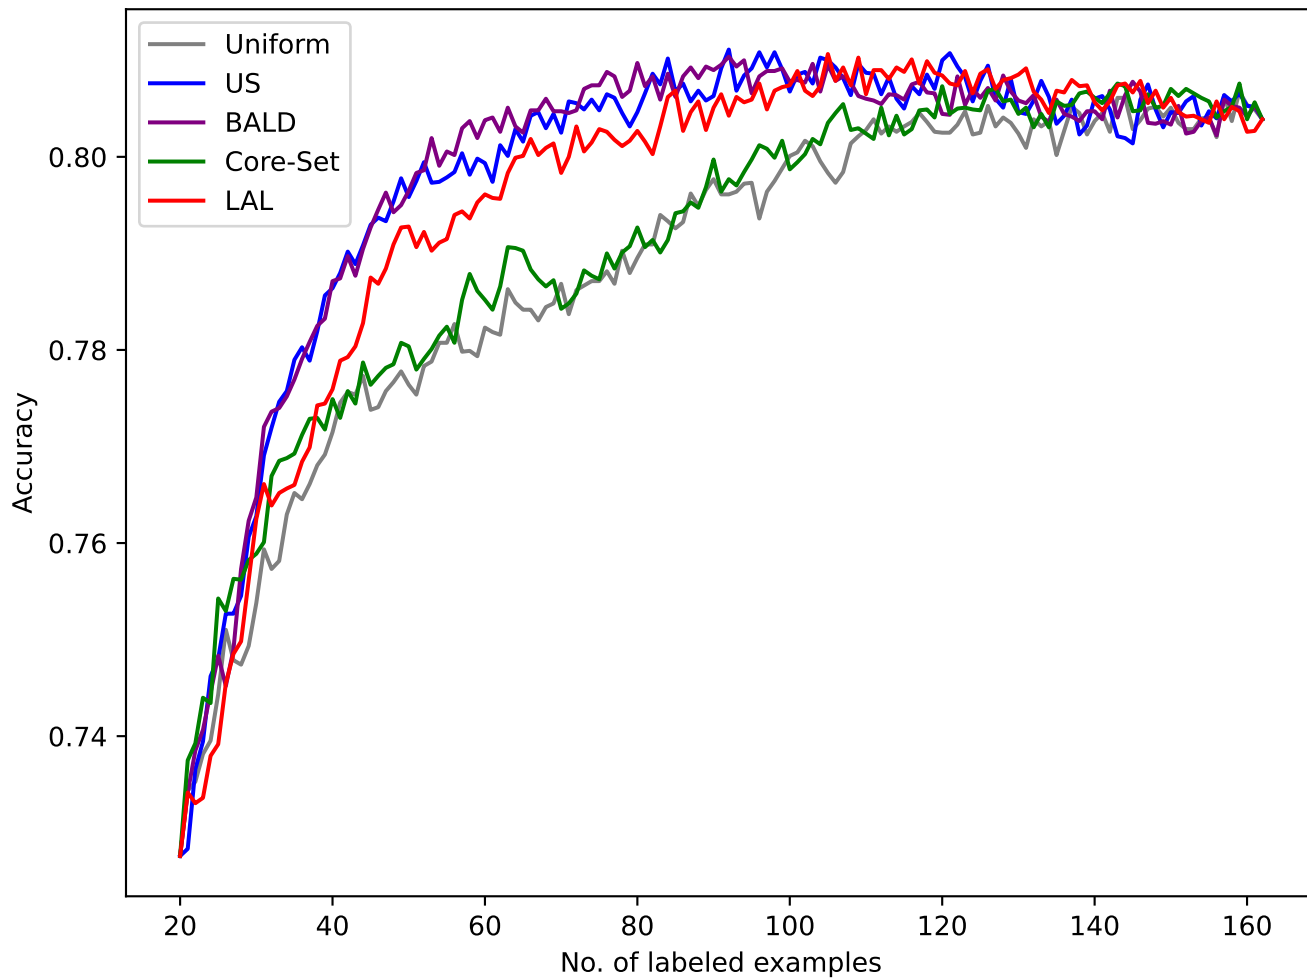

Supplement: supplementary_material [file attachment]

Learning curves on Diabetes

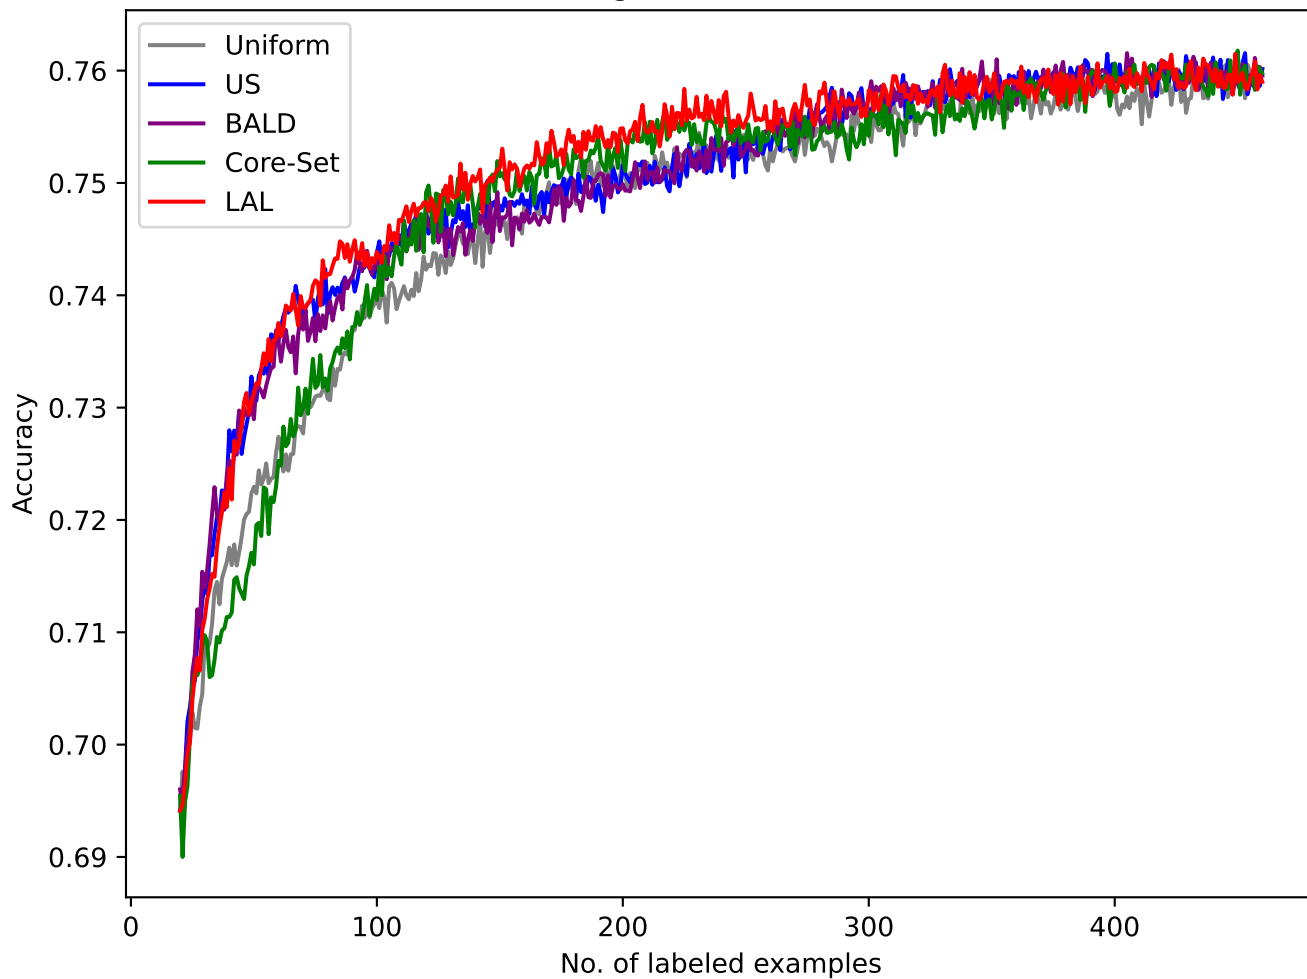

Supplement: supplementary_material [file attachment]

Learning curves with 95% C.I. on Diabetes

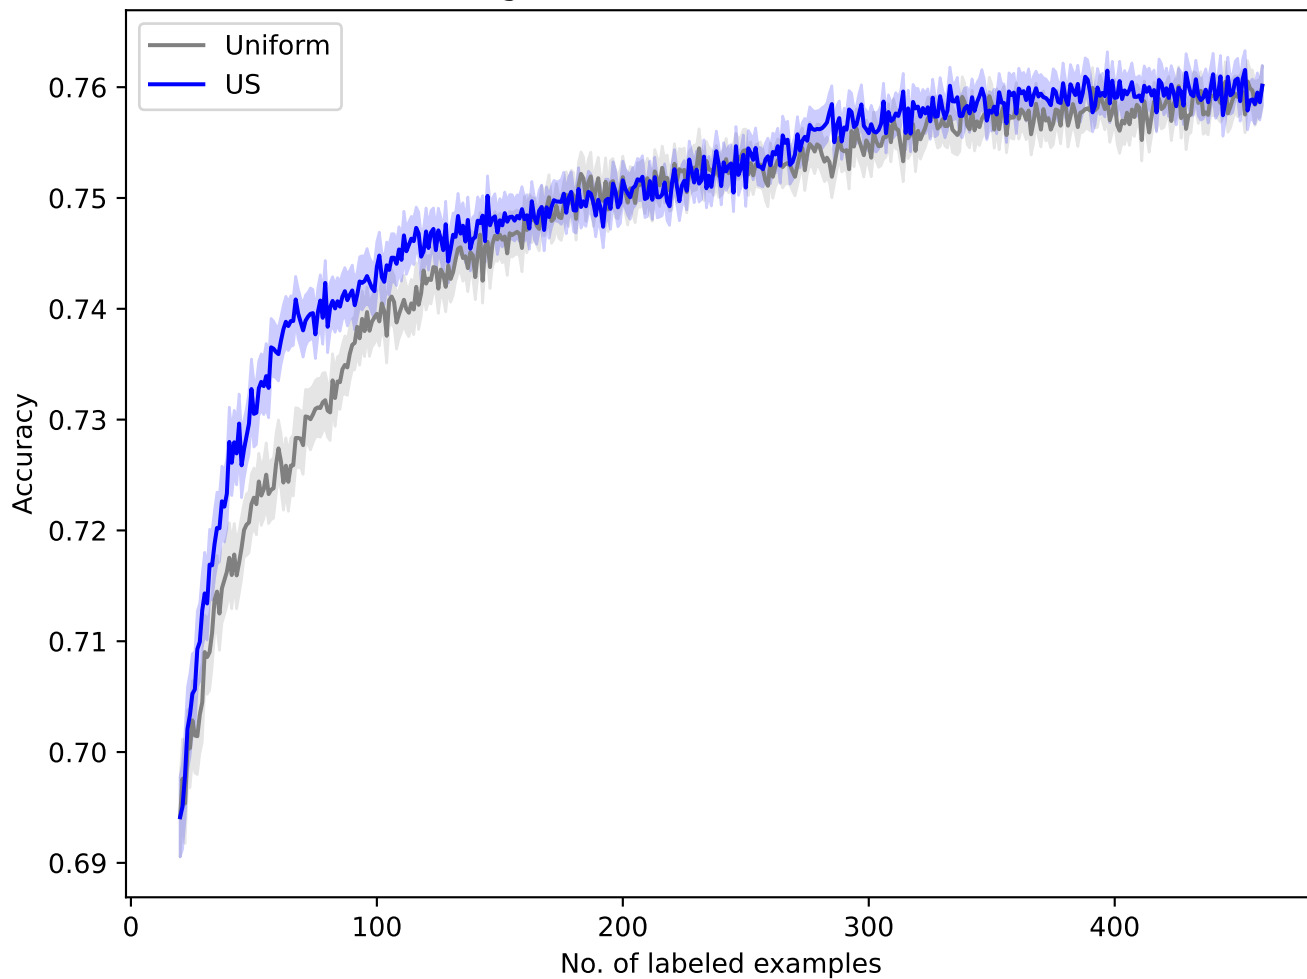

Supplement: supplementary_material [file attachment]

Learning curves with 95% C.I. on Gcloudb

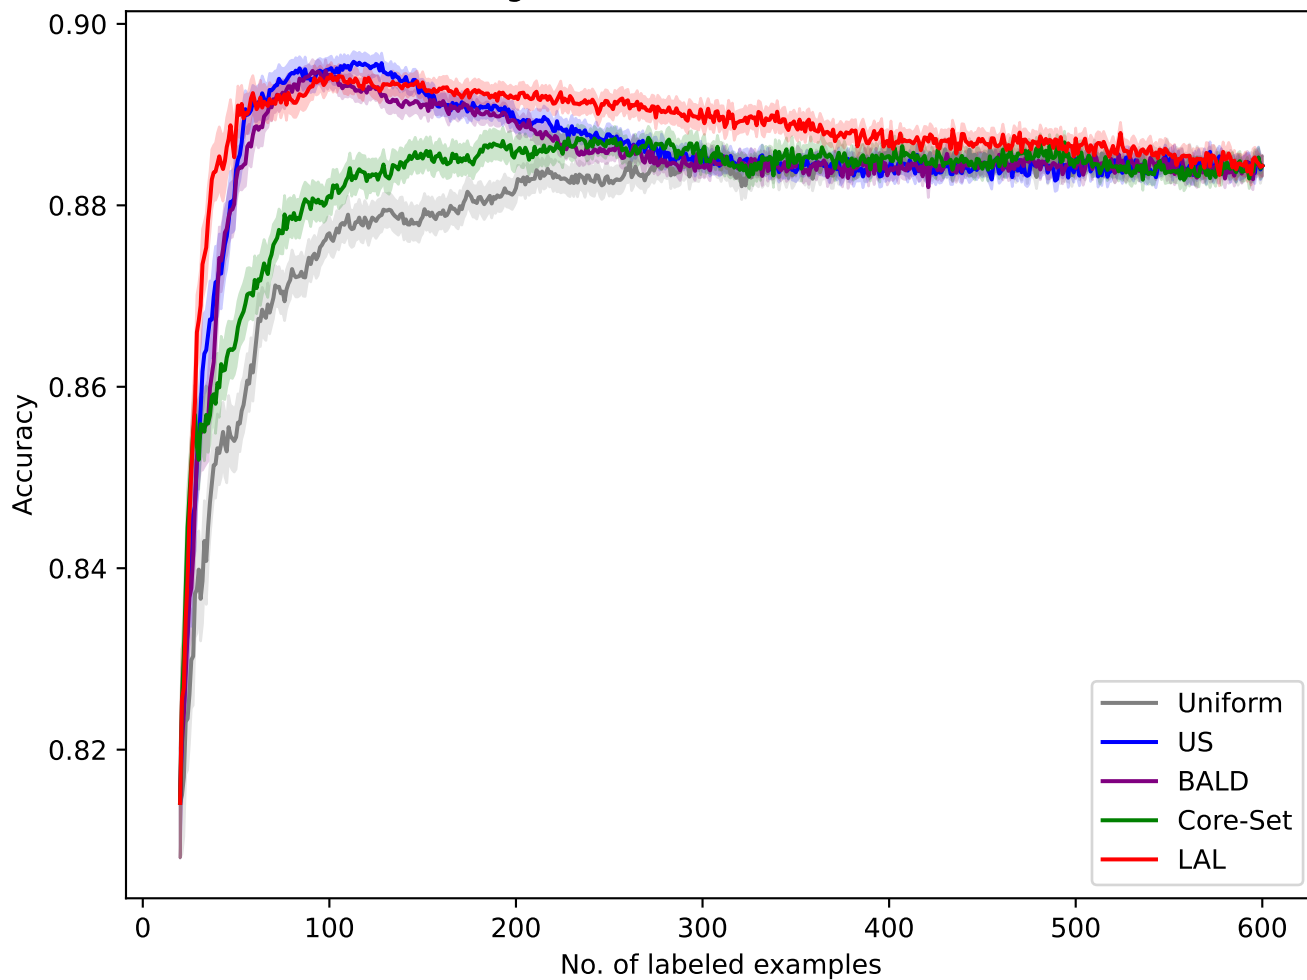

Supplement: supplementary_material [file attachment]

Difference of accuracy on Ex8b

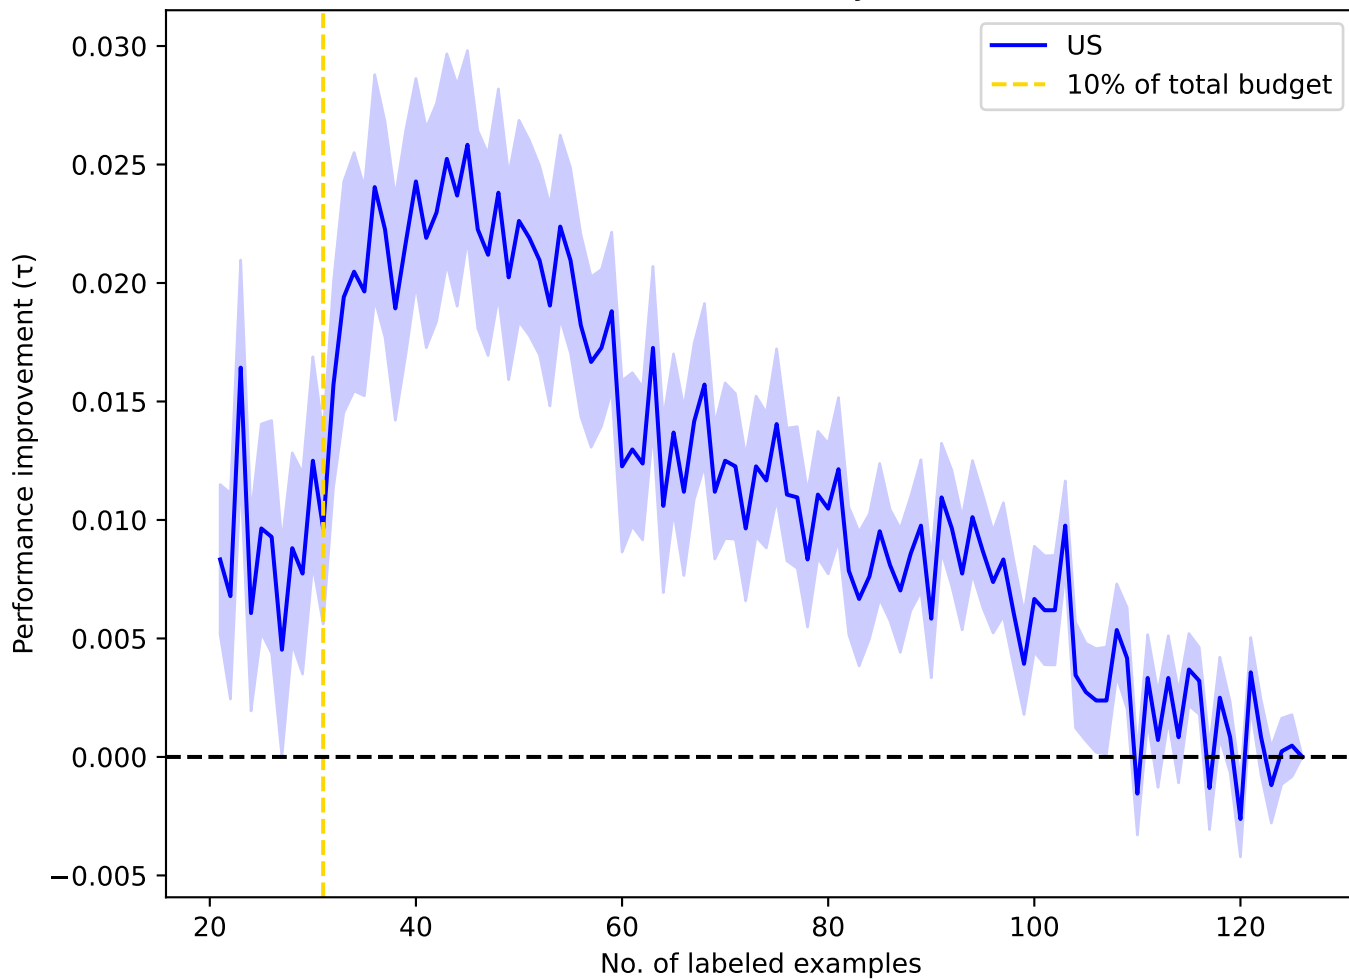

Supplement: supplementary_material [file attachment]

Difference of accuracy on Phishing

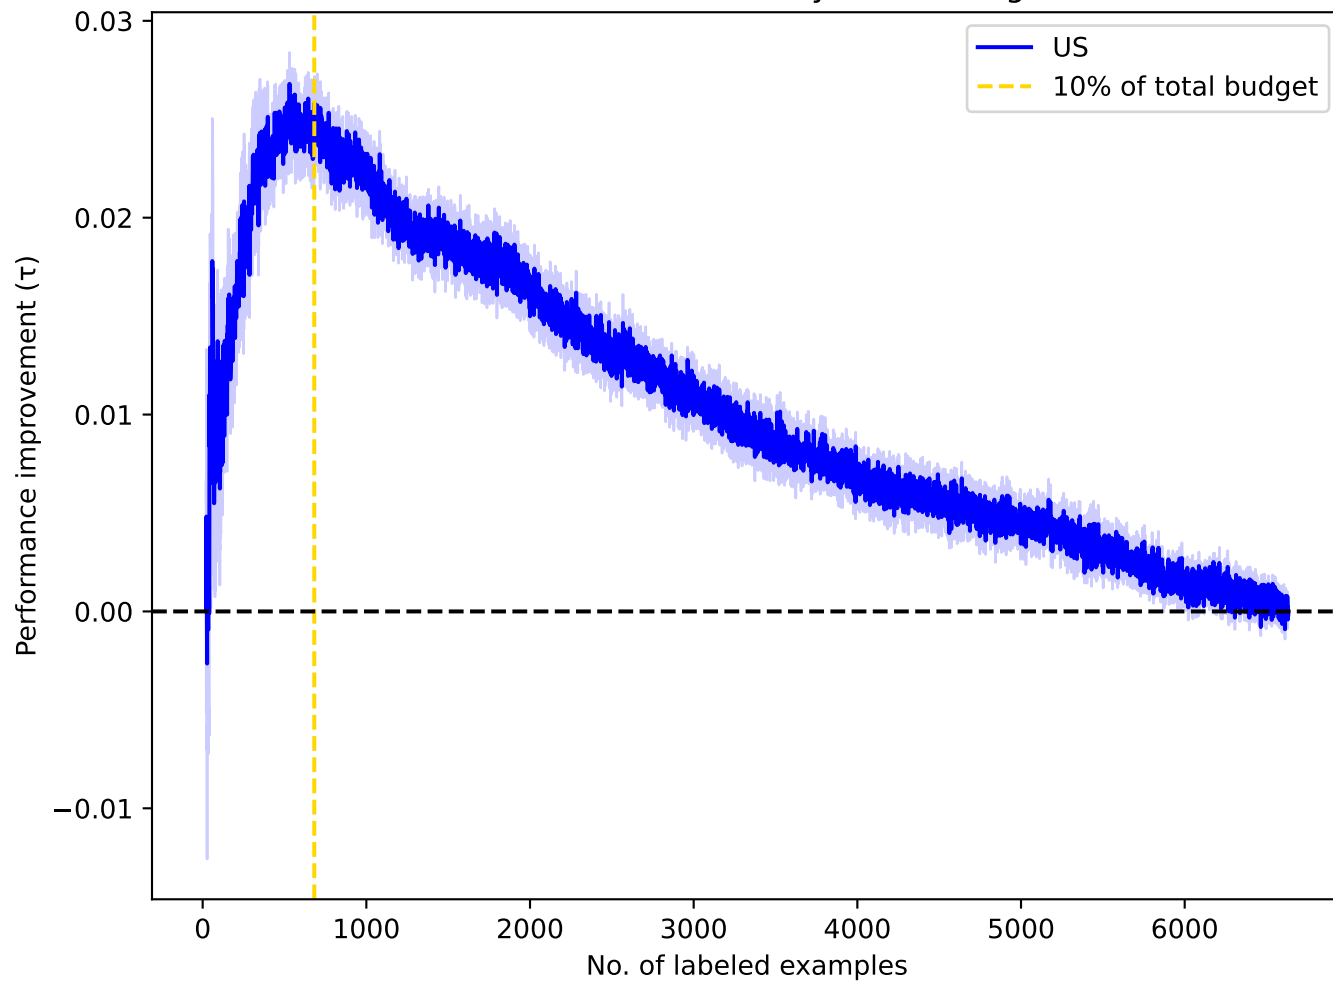

Supplement: supplementary_material [file attachment]

Learning curves with 95% C.I. on Checkerboard

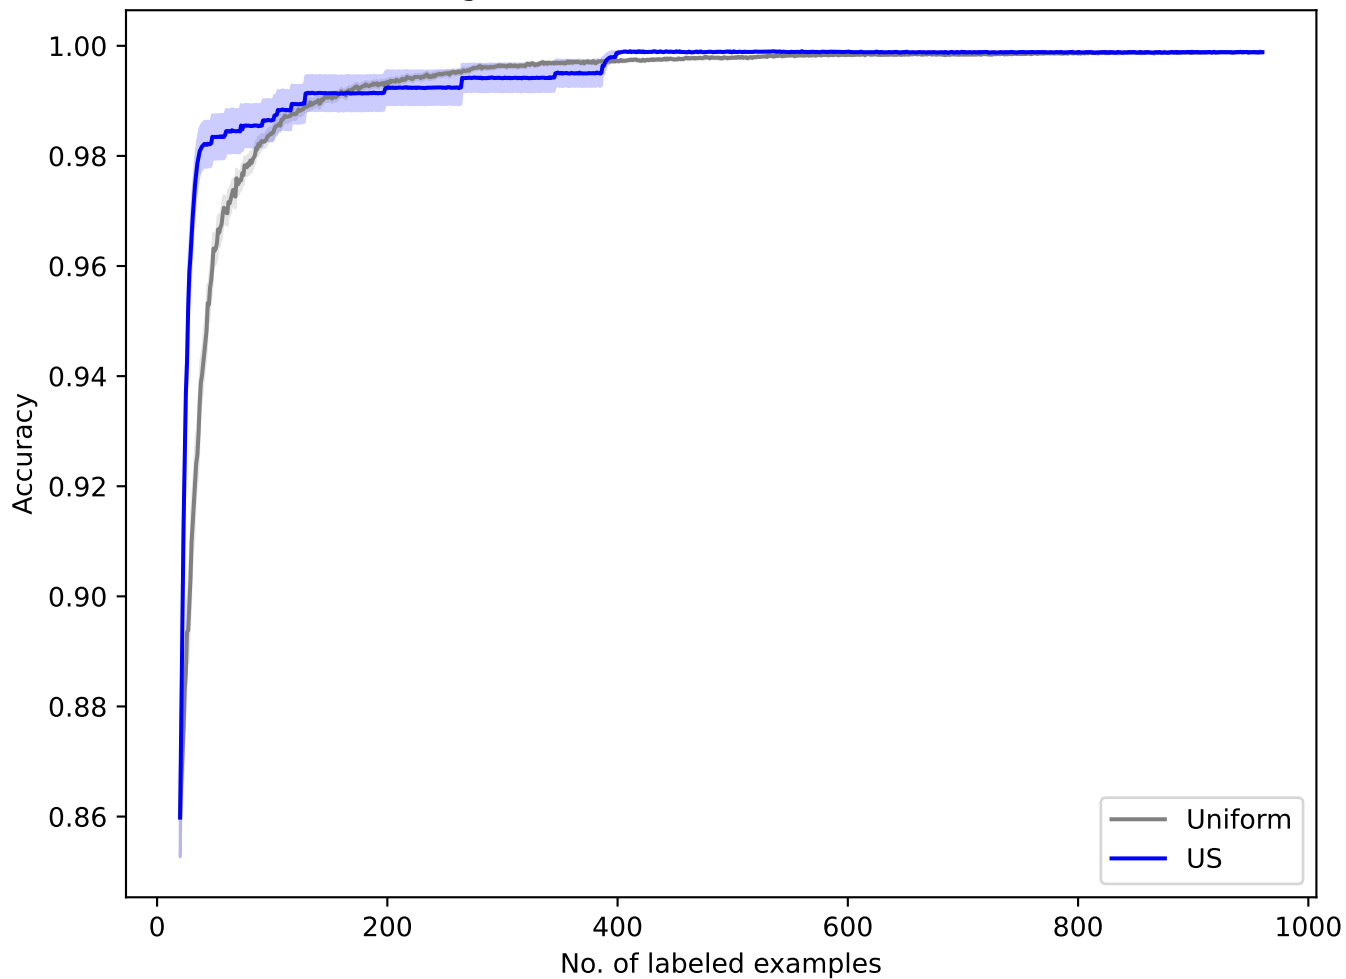

Supplement: supplementary_material [file attachment]

Learning curves on Twonorm

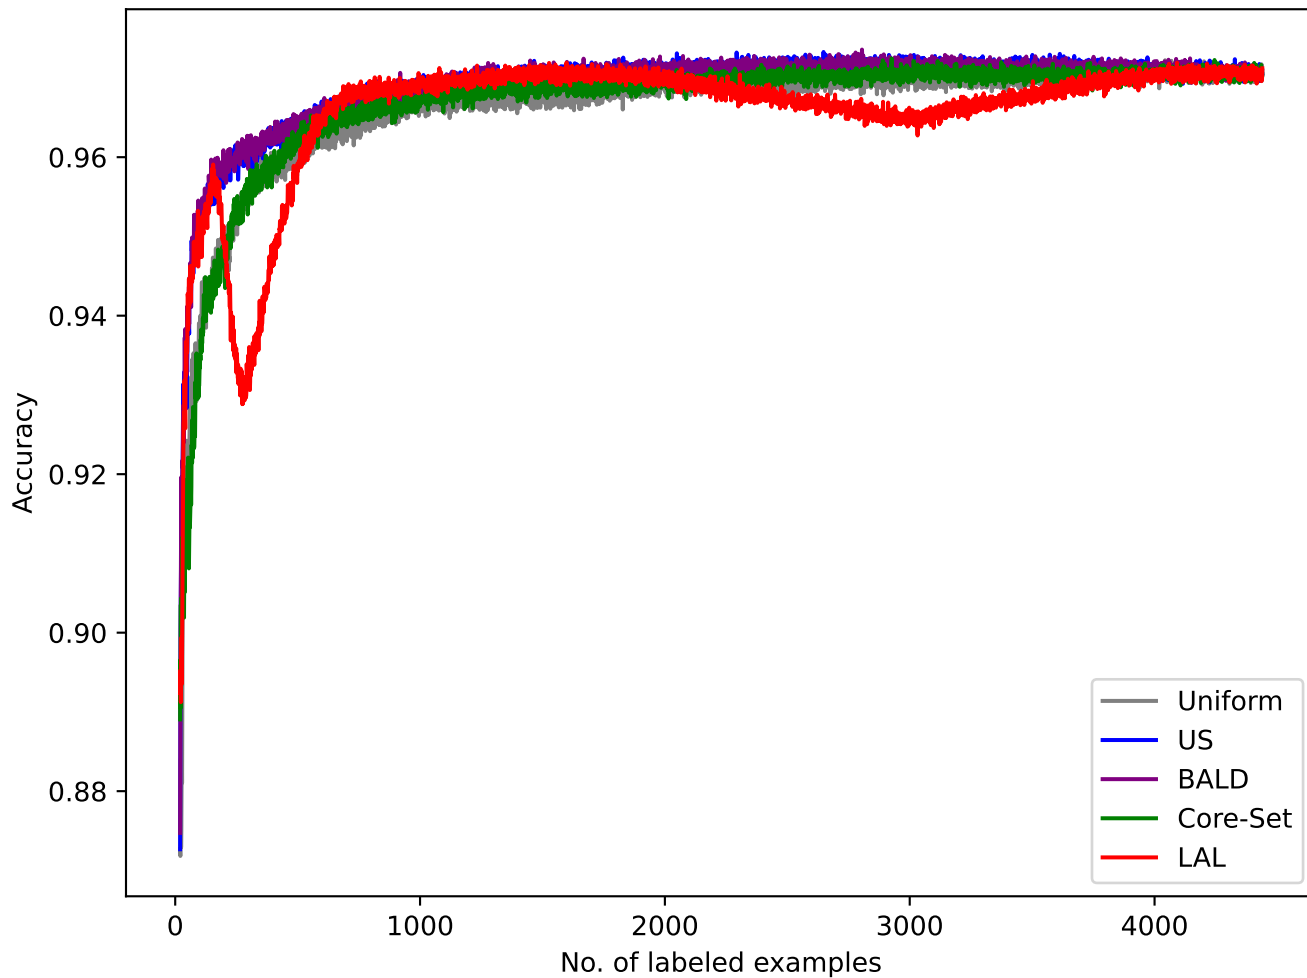

Supplement: supplementary_material [file attachment]

Difference of accuracy on Covertypes

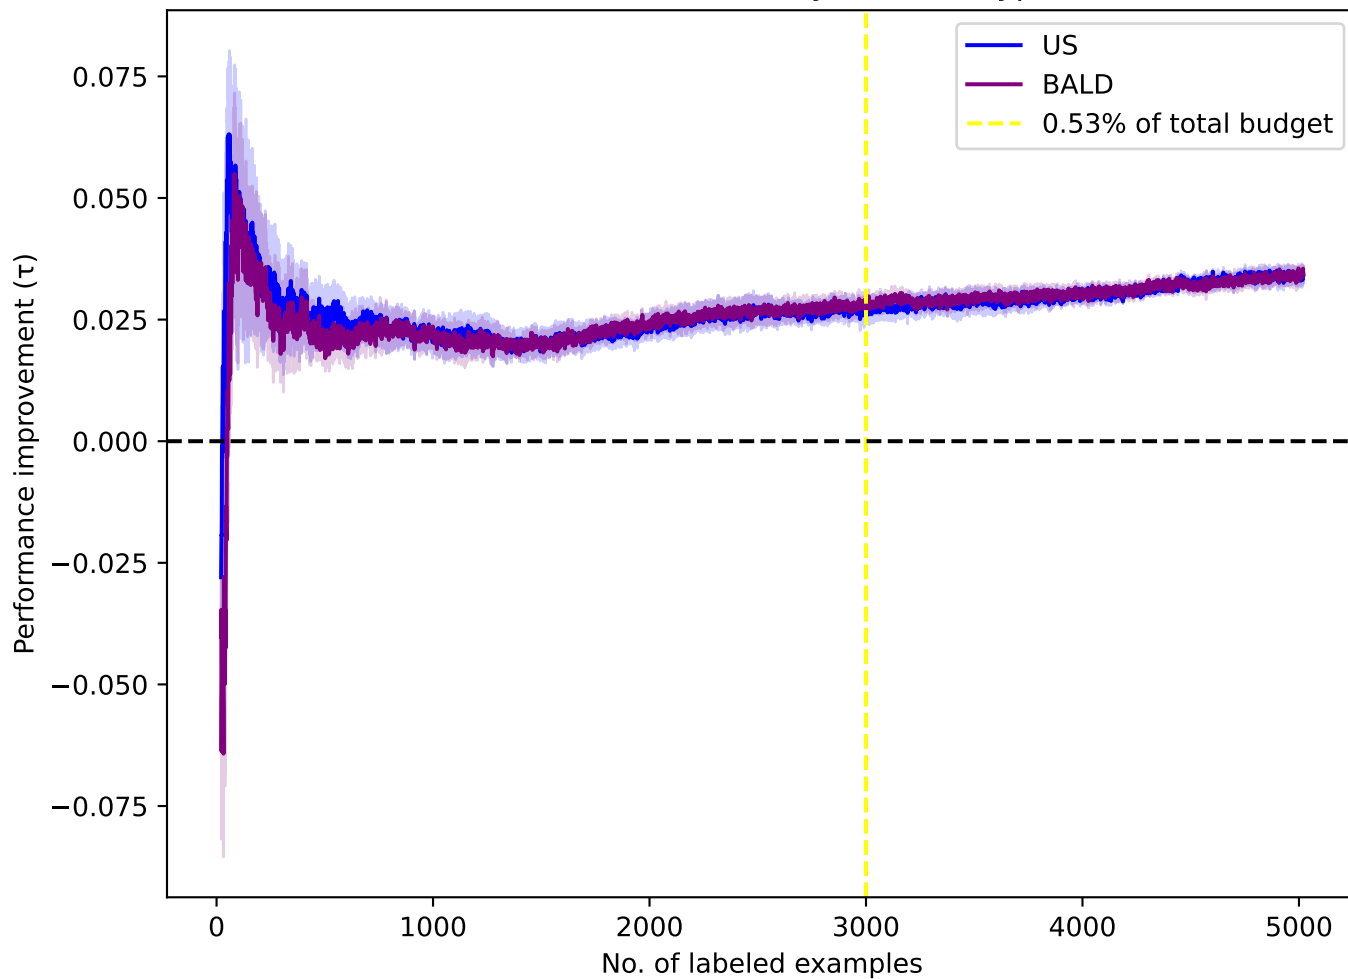

Supplement: supplementary_material [file attachment]

Learning curves on Ringnorm

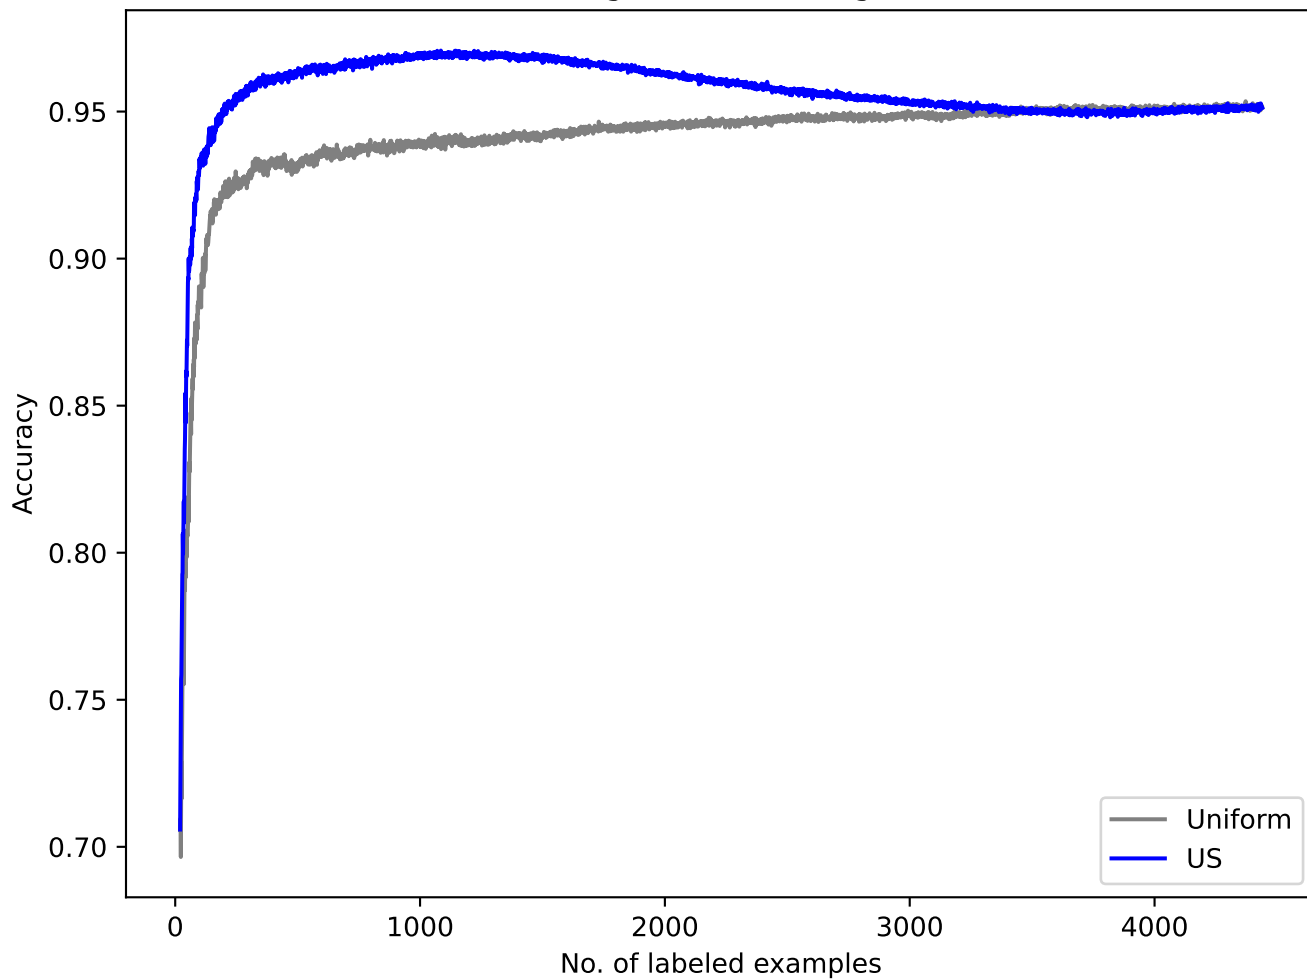

Supplement: supplementary_material [file attachment]

Difference of accuracy on German

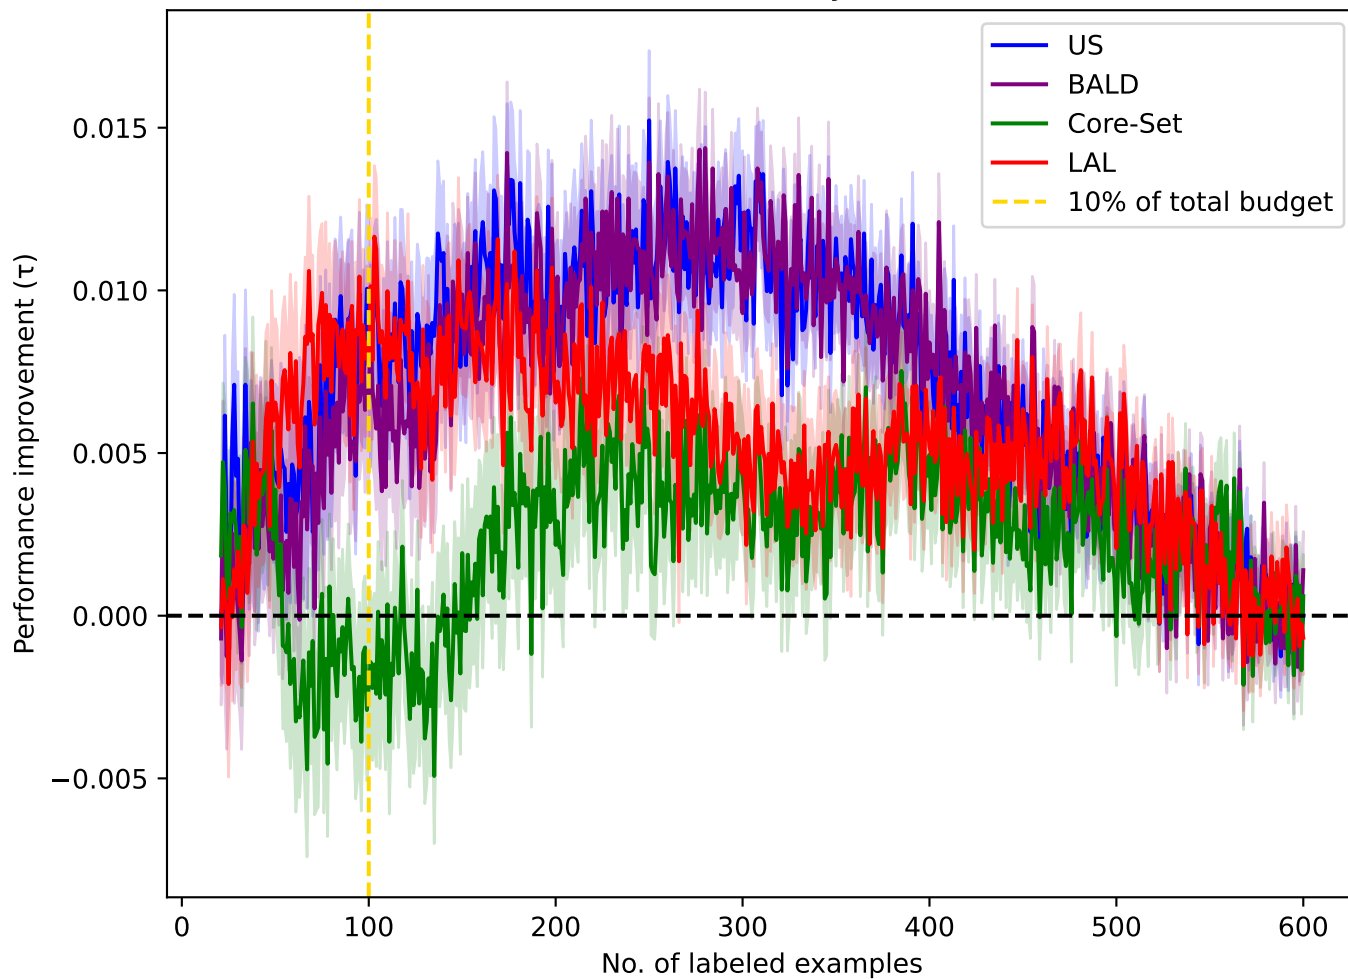

Supplement: supplementary_material [file attachment]

Difference of accuracy on Gcloudb

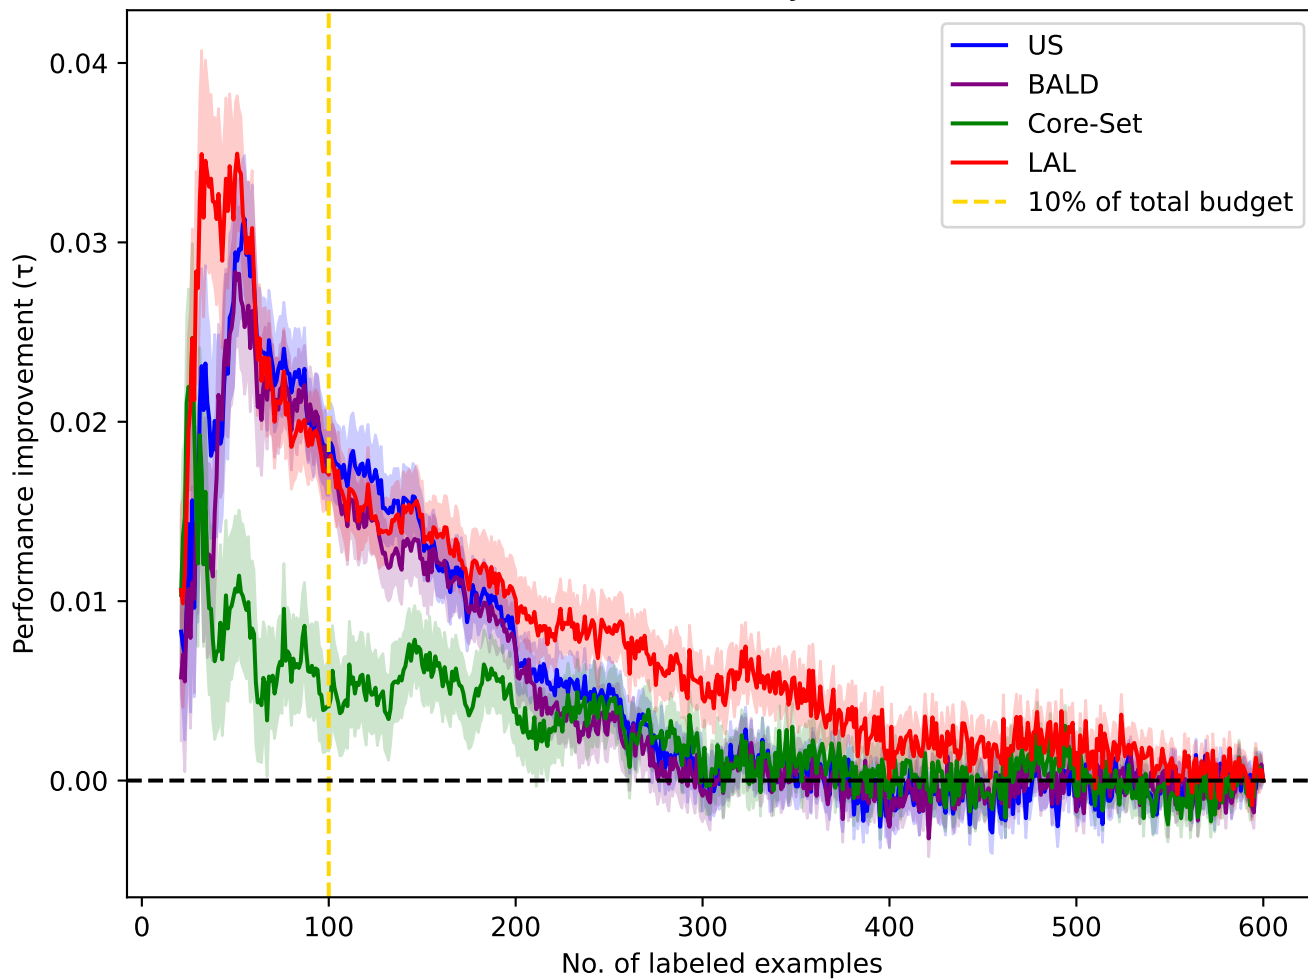

Supplement: supplementary_material [file attachment]

Learning curves on Breast

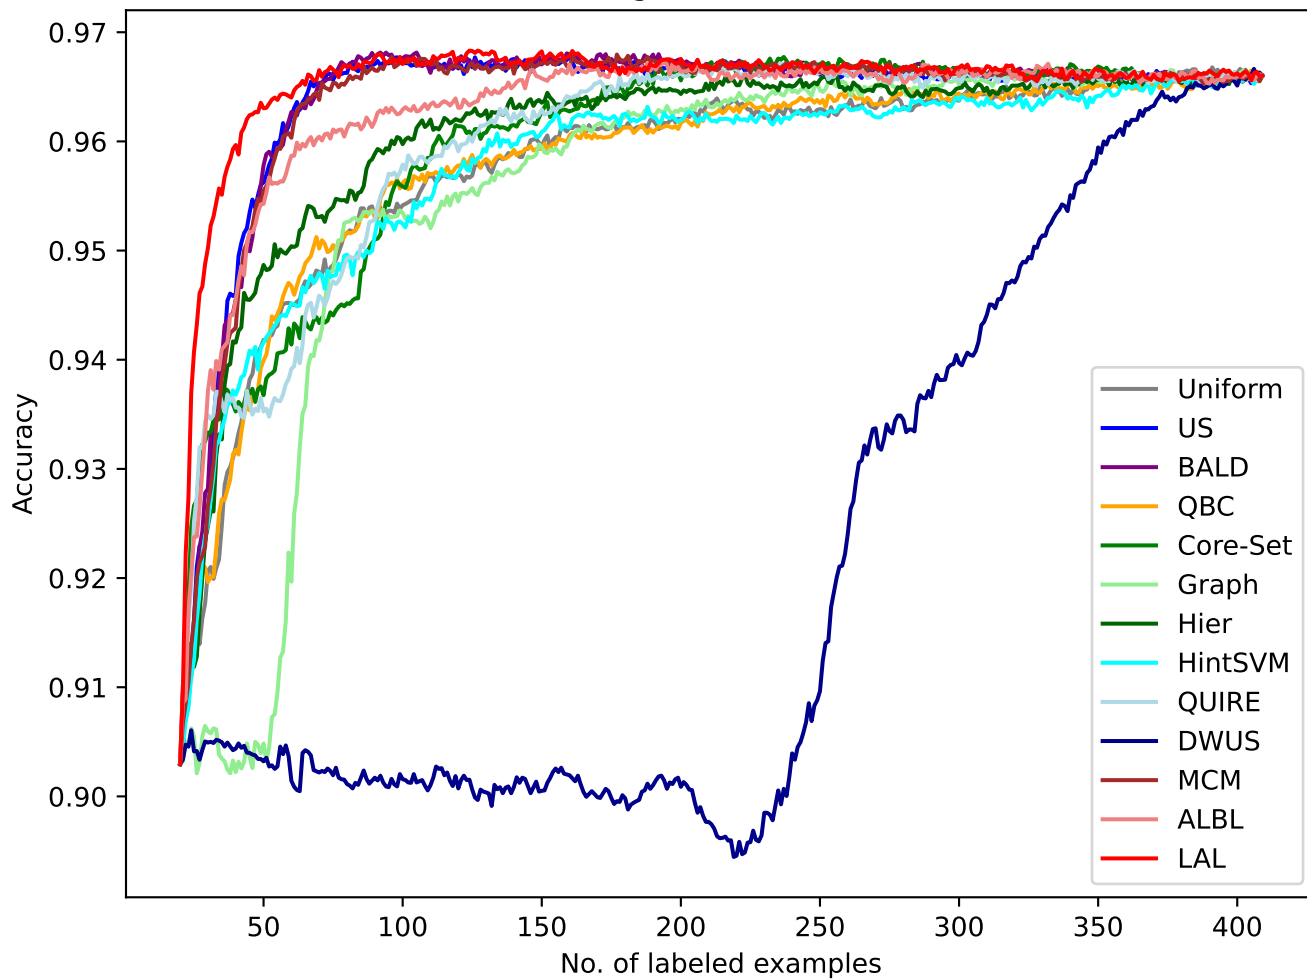

Supplement: supplementary_material [file attachment]

Difference of accuracy on Checkerboard

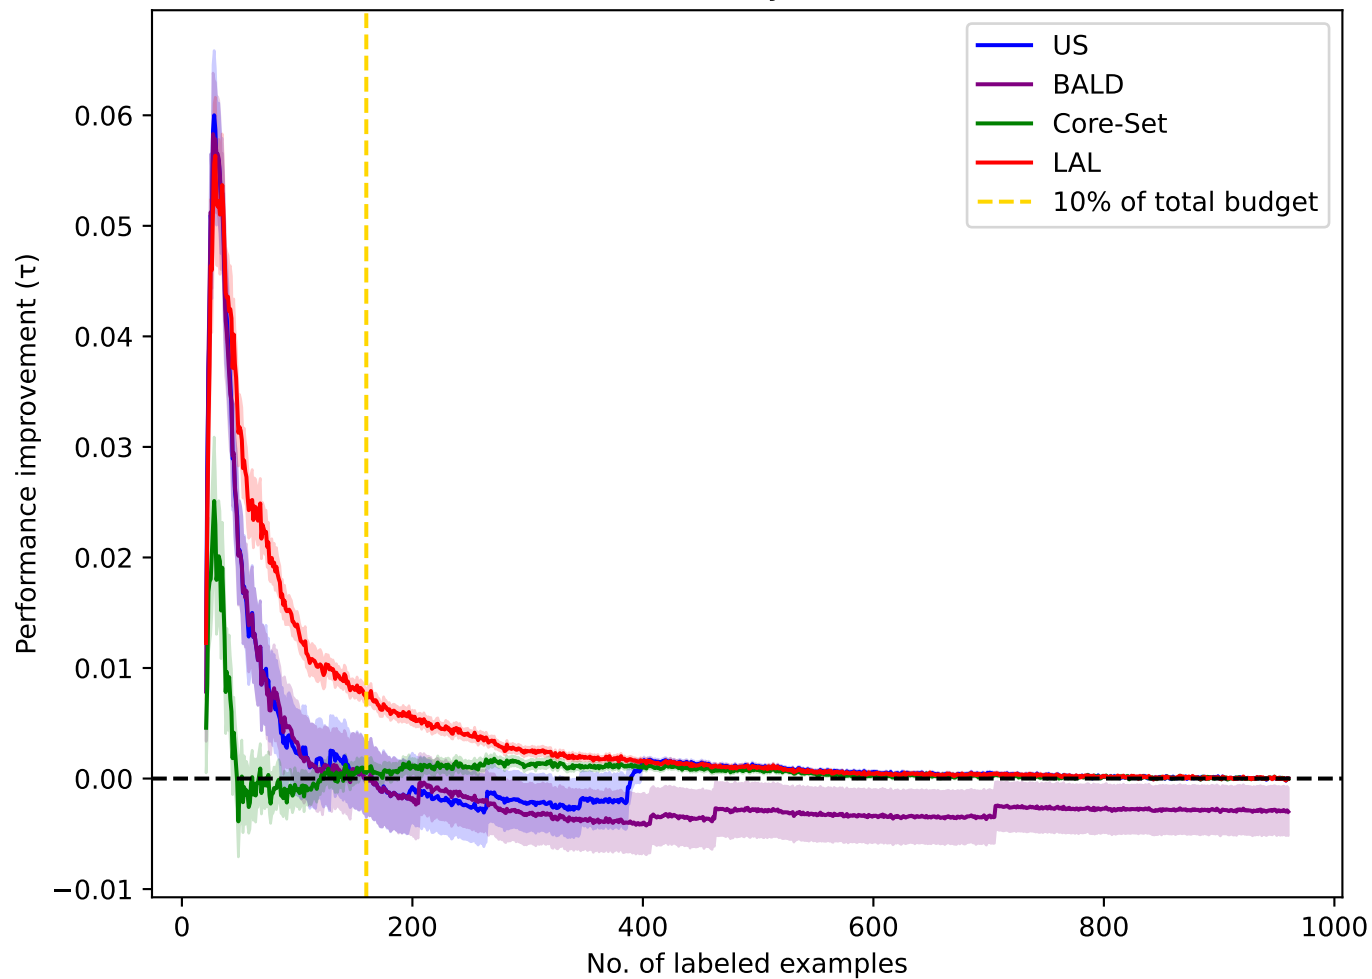

Supplement: supplementary_material [file attachment]

Learning curves with 95% C.I. on Heart

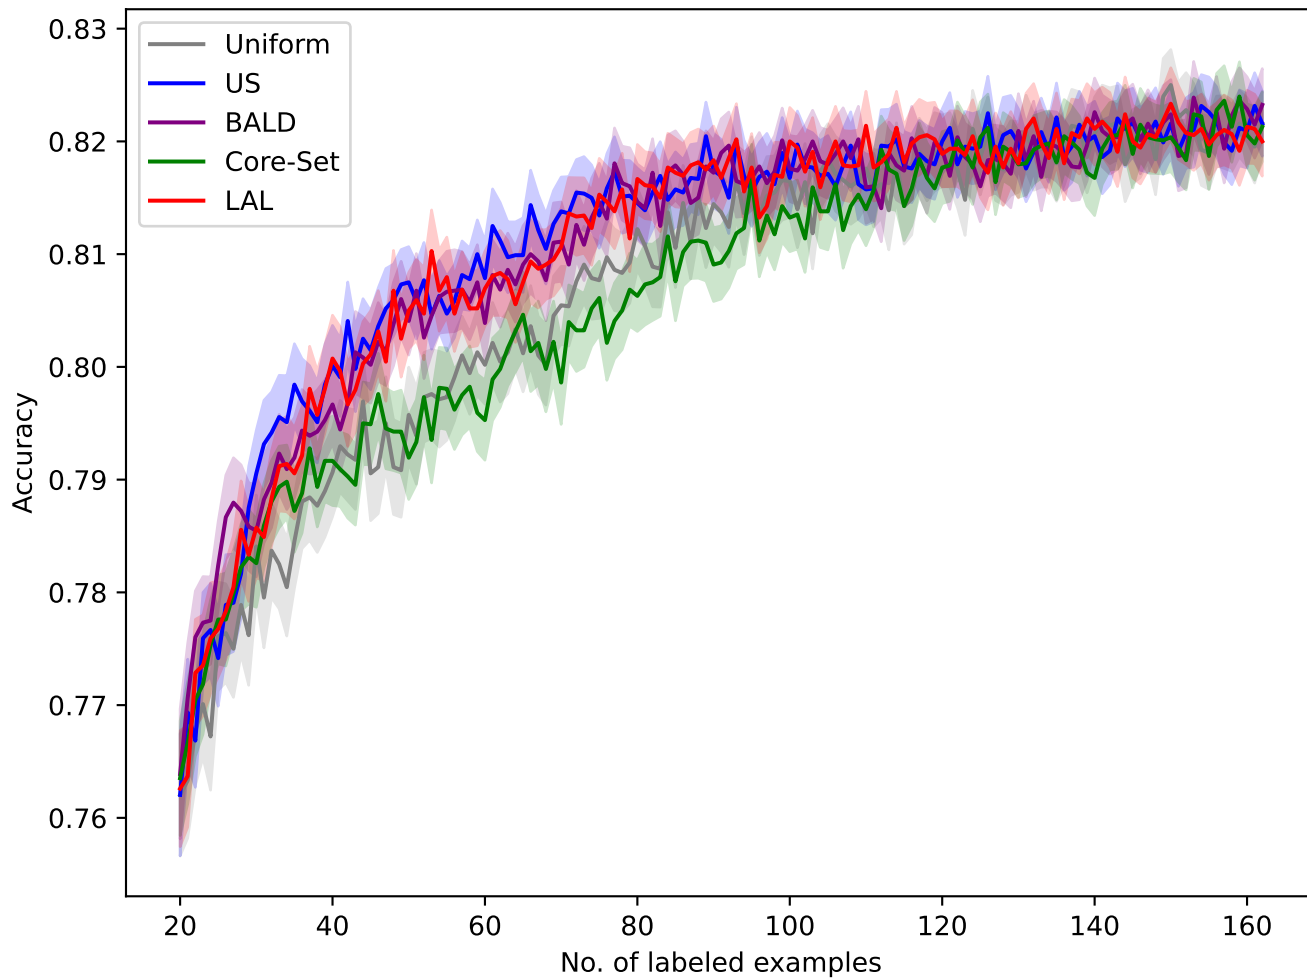

Supplement: supplementary_material [file attachment]

Difference of accuracy on Clean1

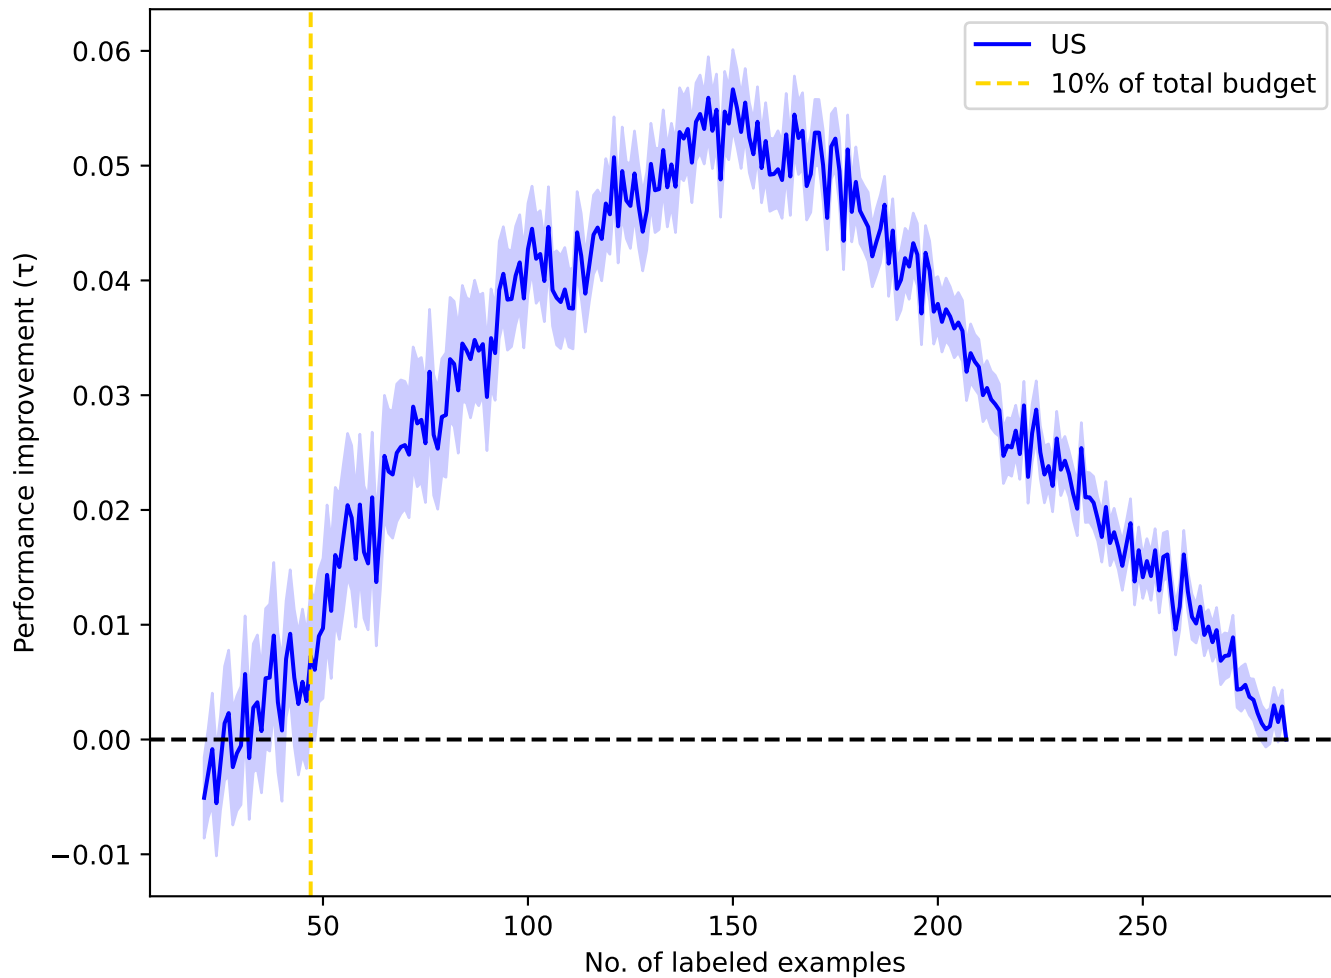

Supplement: supplementary_material [file attachment]

Difference of accuracy on Phishing

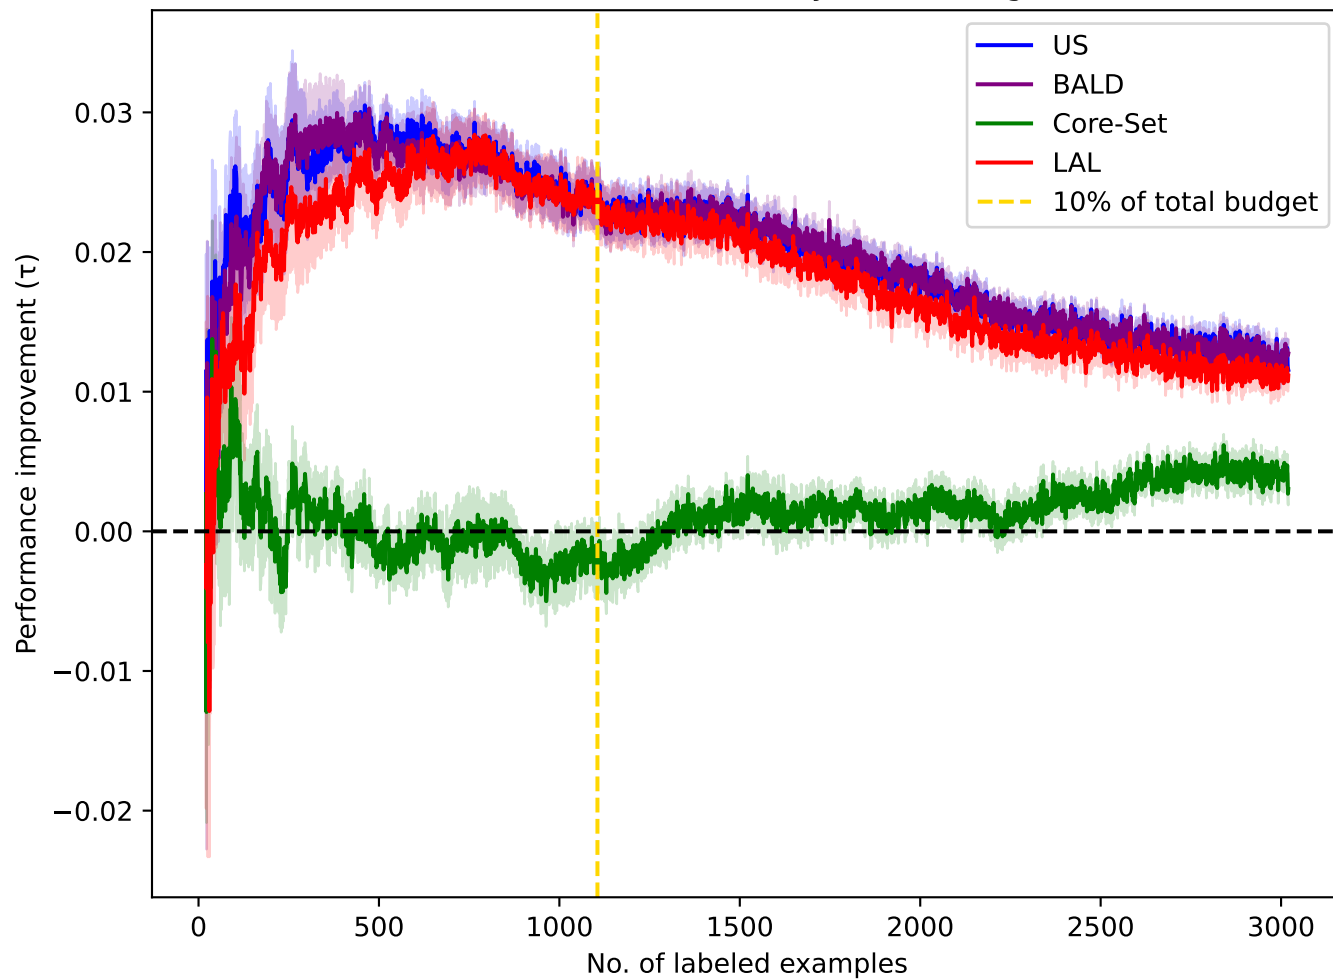

Supplement: supplementary_material [file attachment]

Learning curves on Covertypes

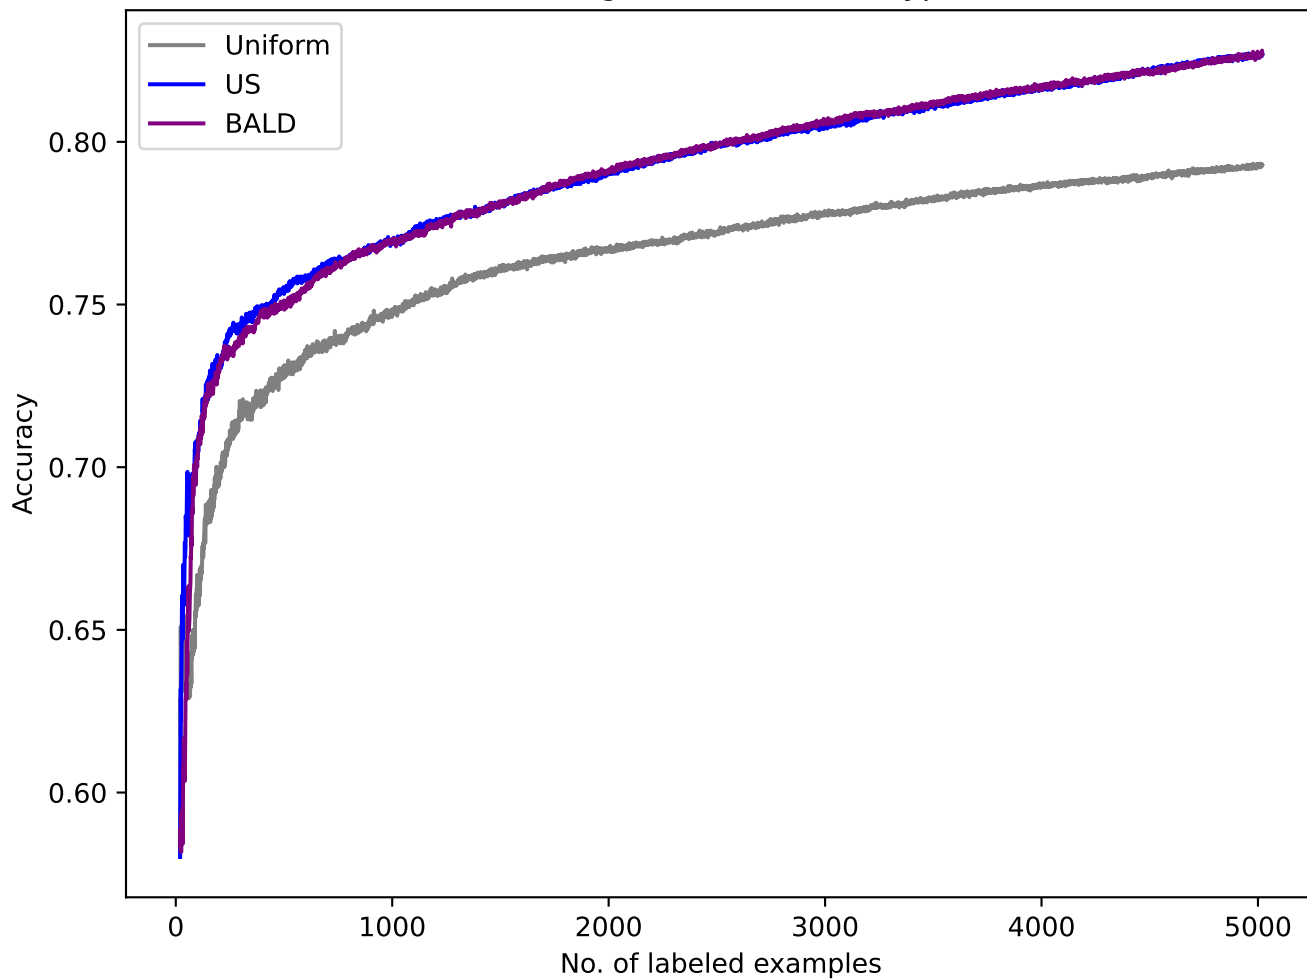

Supplement: supplementary_material [file attachment]

Difference of accuracy on Gcloudub

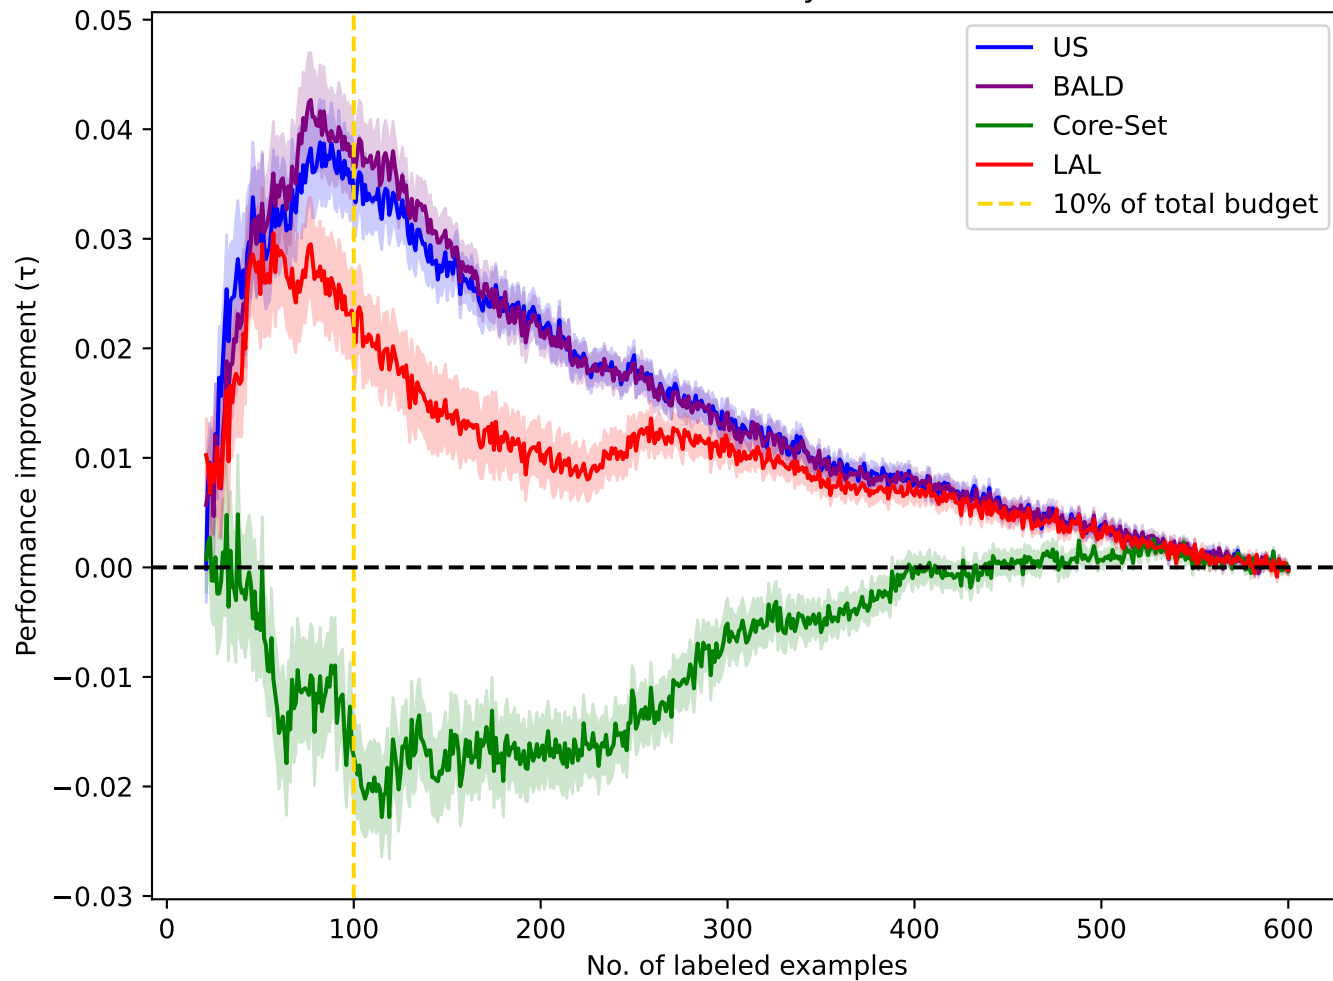

Supplement: supplementary_material [file attachment]

Learning curves on Phoneme

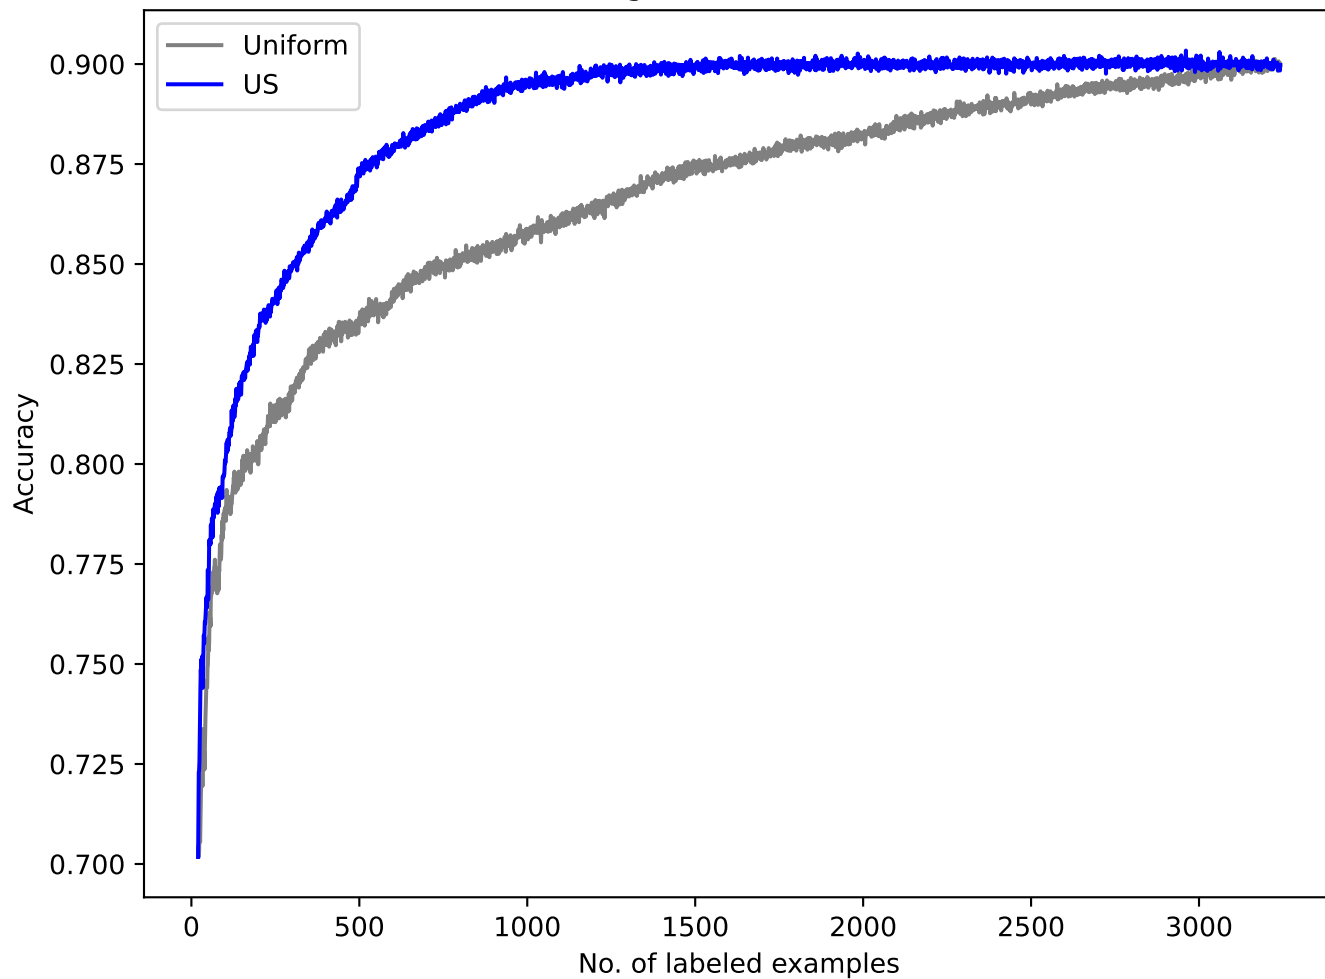

Supplement: supplementary_material [file attachment]

Learning curves on Pol

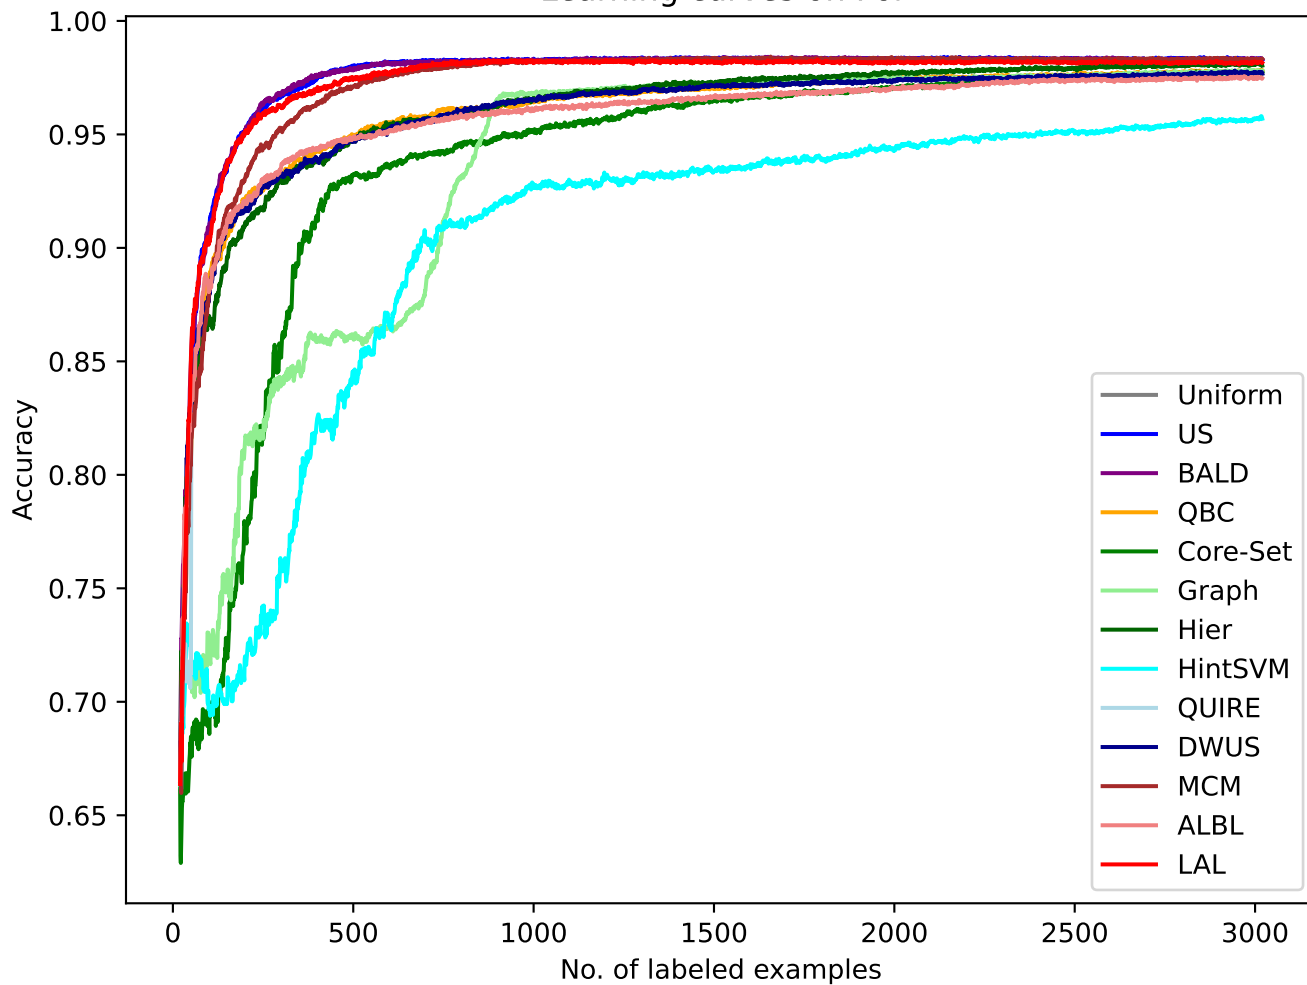

Supplement: supplementary_material [file attachment]

Learning curves on Haberman

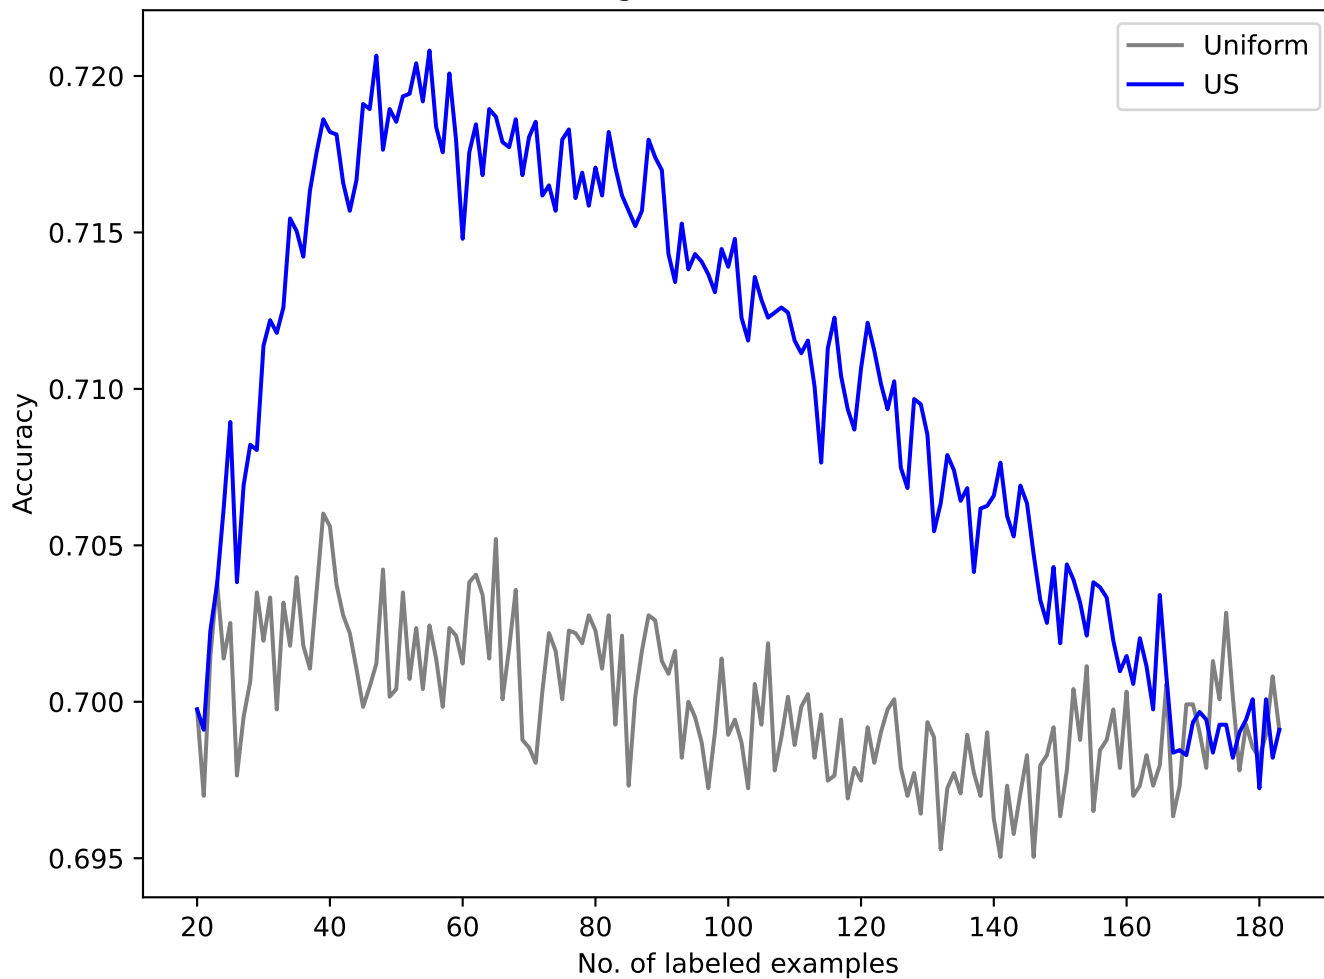

Supplement: supplementary_material [file attachment]

Difference of accuracy on Covertypes

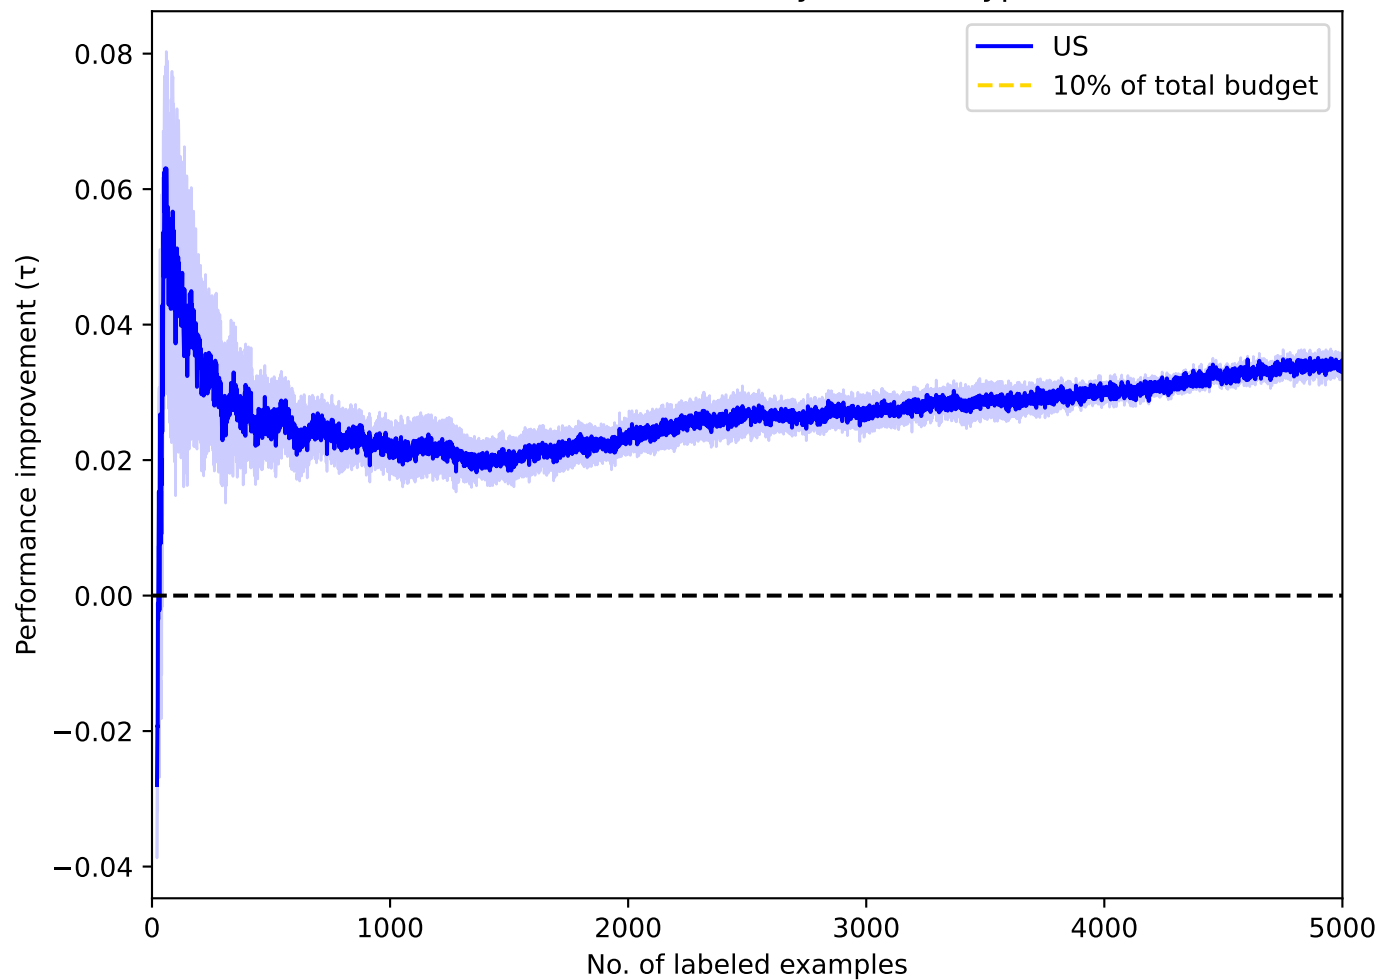

Supplement: supplementary_material [file attachment]

Learning curves on Haberman

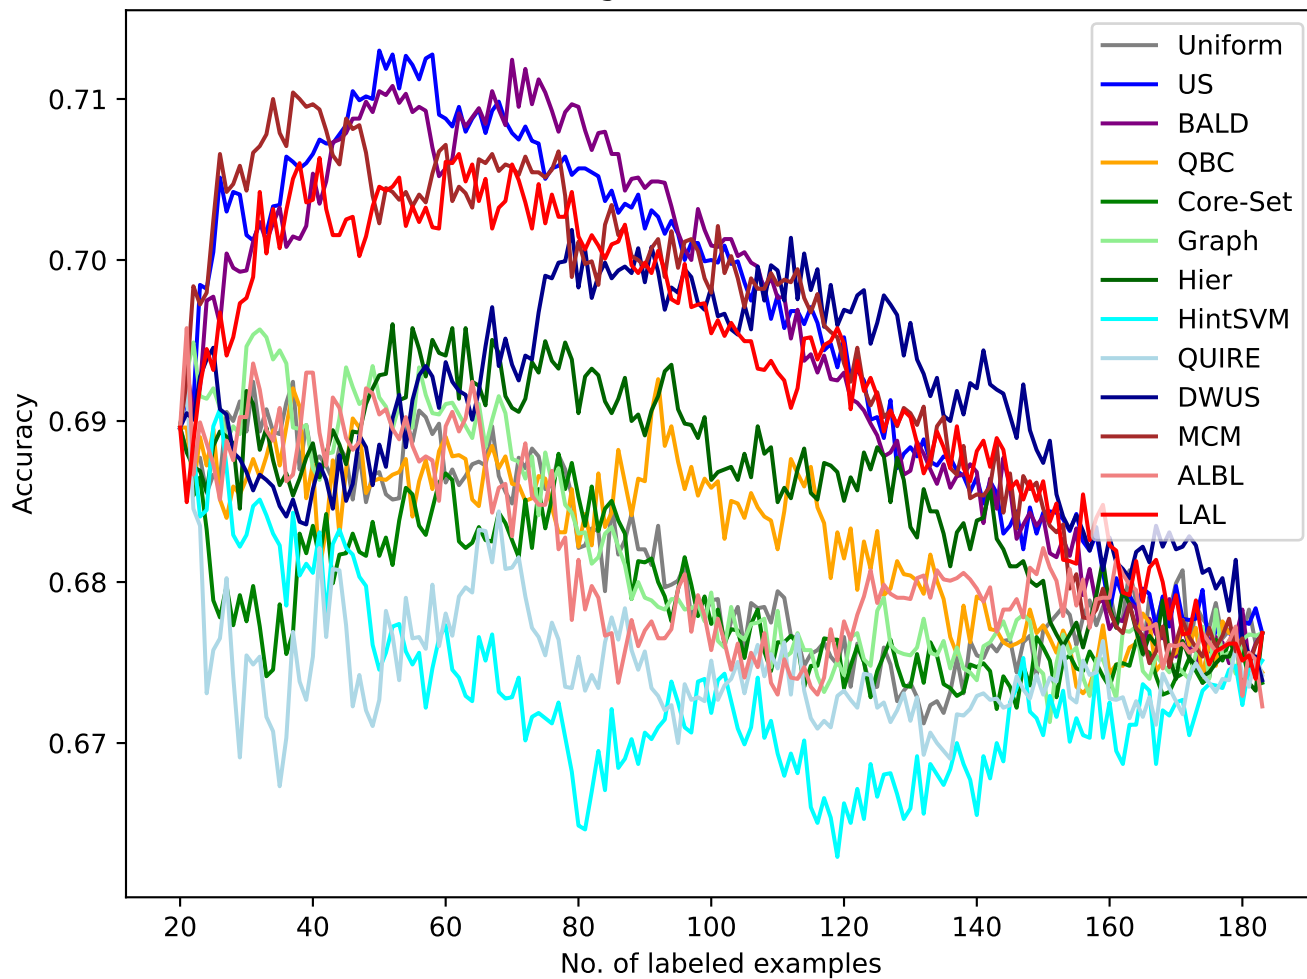

Supplement: supplementary_material [file attachment]

## Learning curves on Sonar

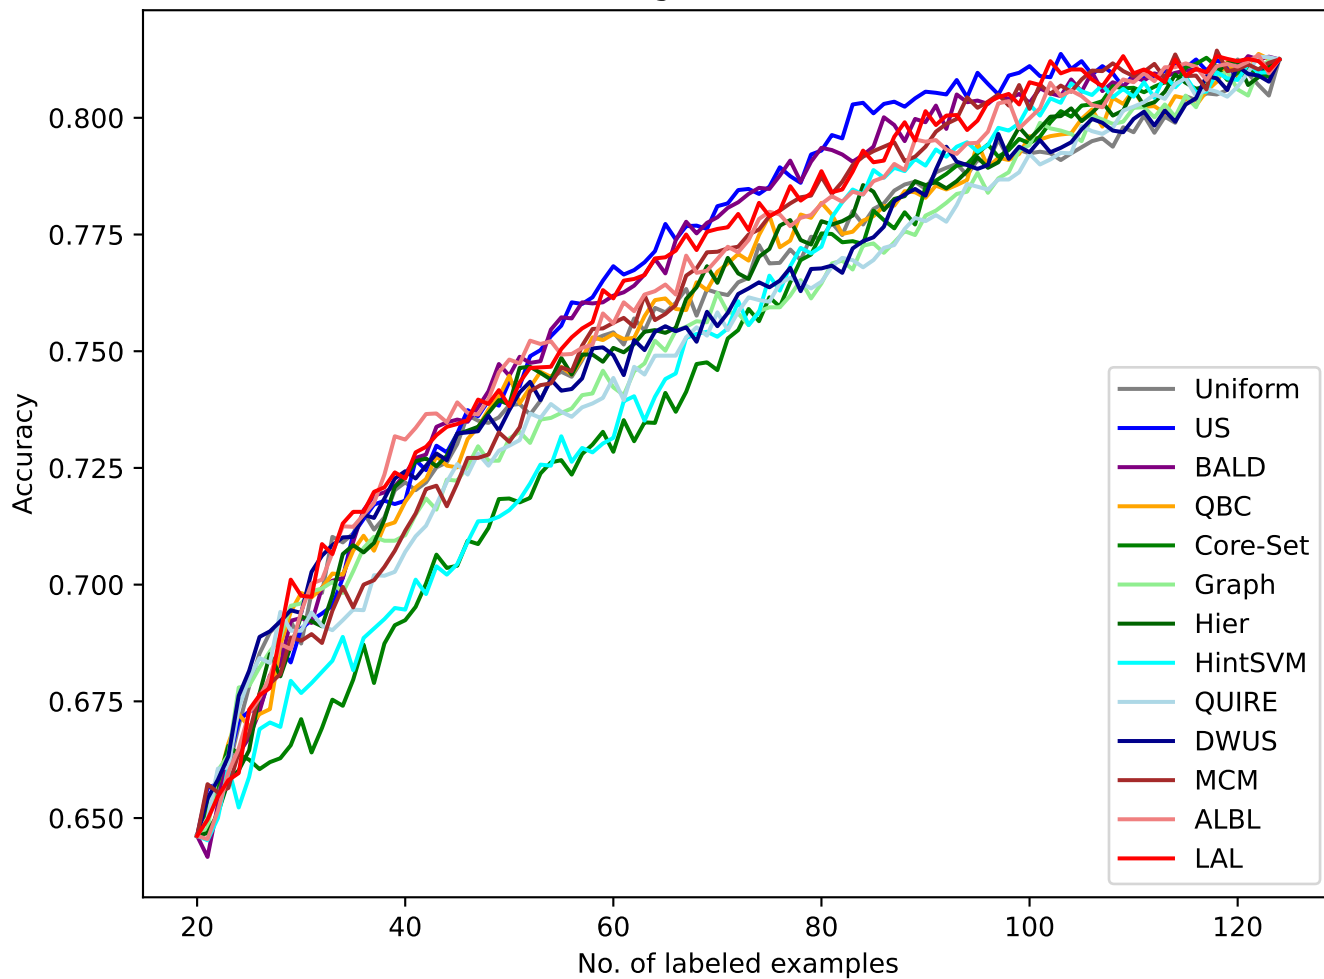

Supplement: supplementary_material [file attachment]

Learning curves on Ringnorm

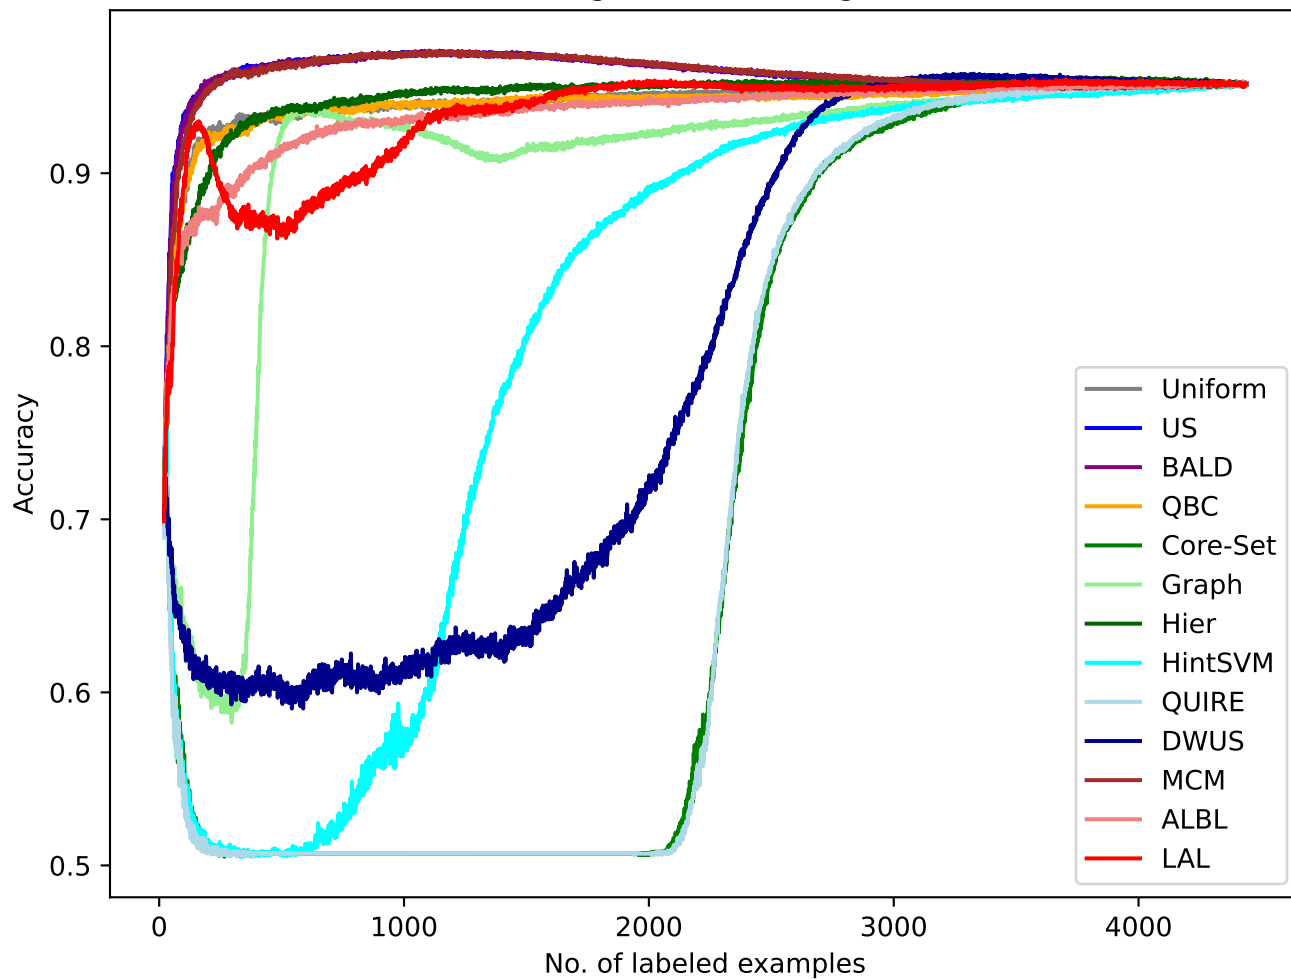

Supplement: supplementary_material [file attachment]

Learning curves on Ex8b

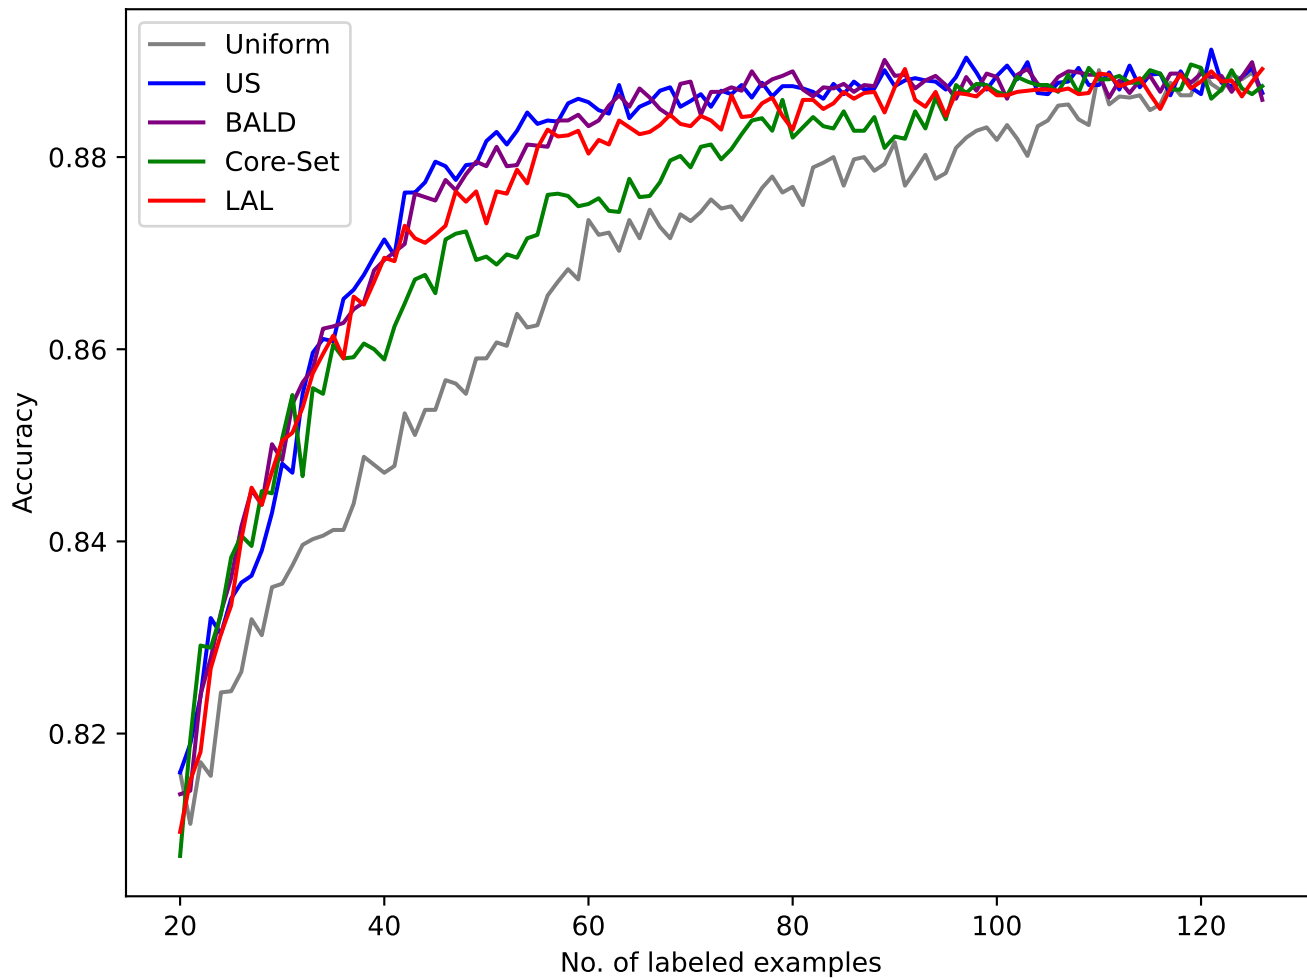

Supplement: supplementary_material [file attachment]

Difference of accuracy on Sonar

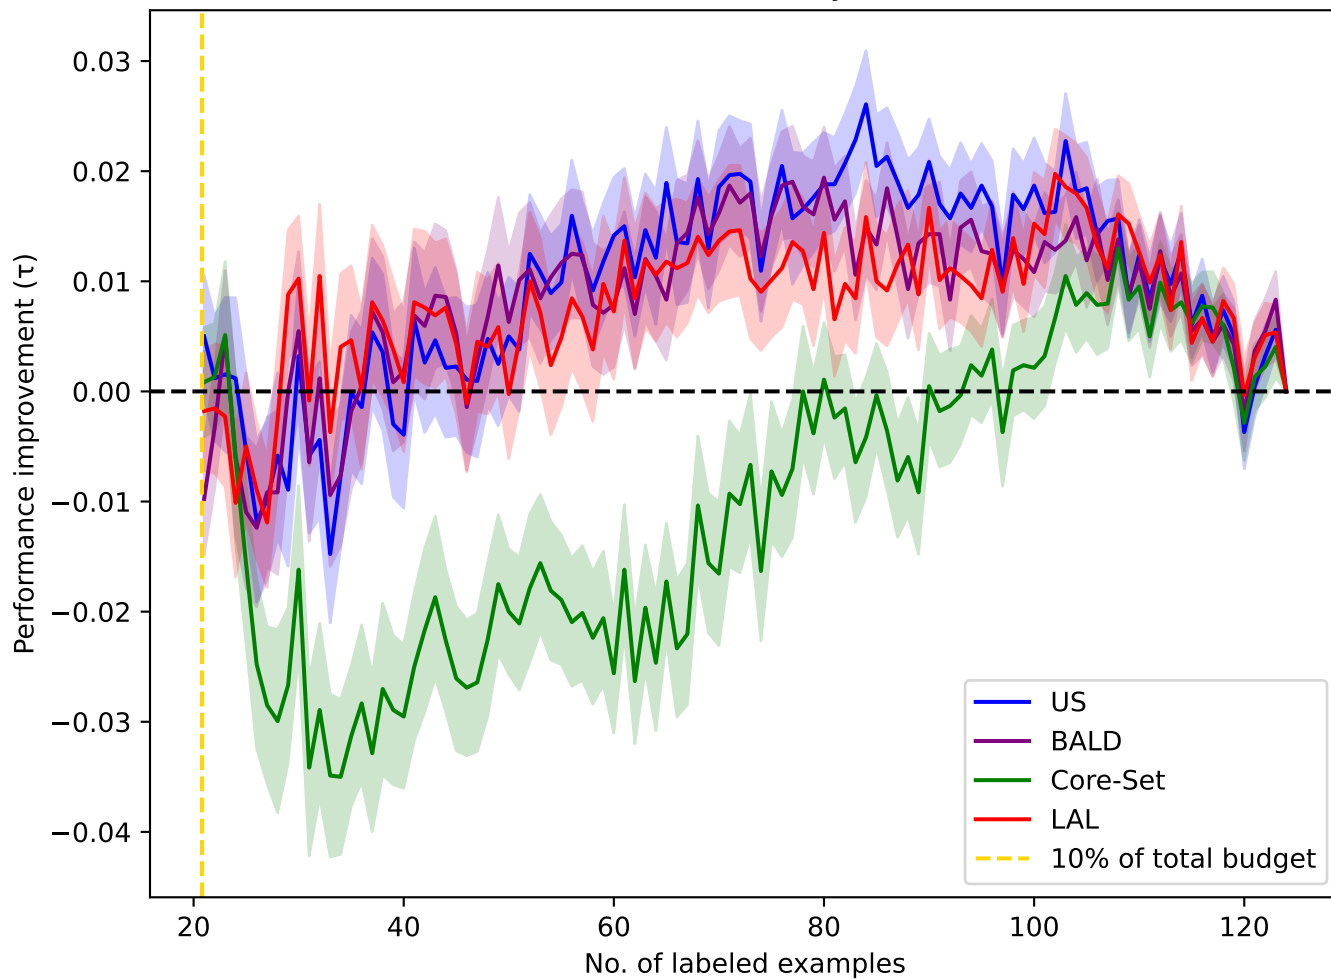

Supplement: supplementary_material [file attachment]

Learning curves on German

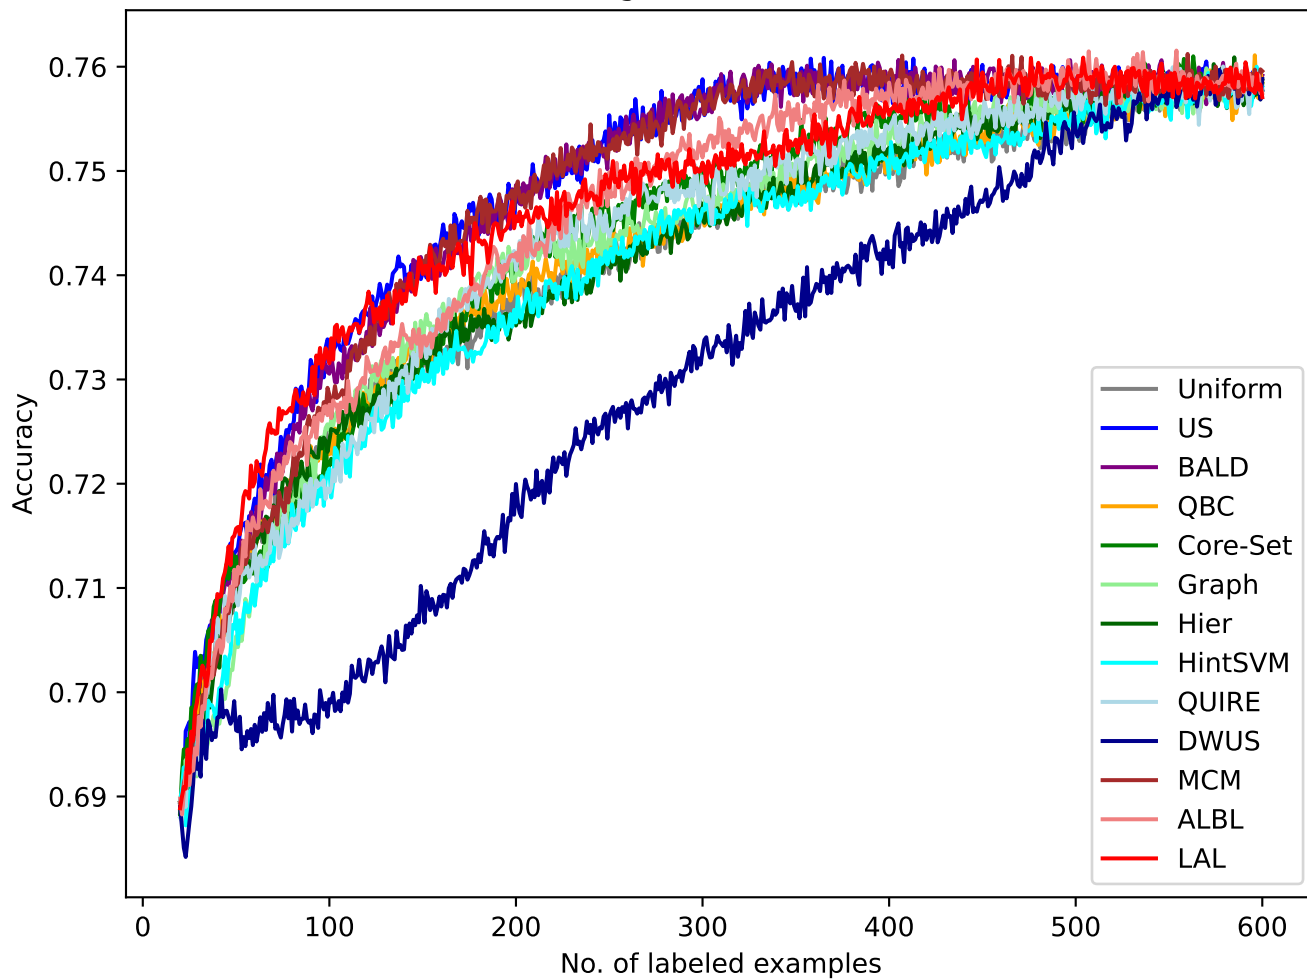

Supplement: supplementary_material [file attachment]

Learning curves on Coverttype

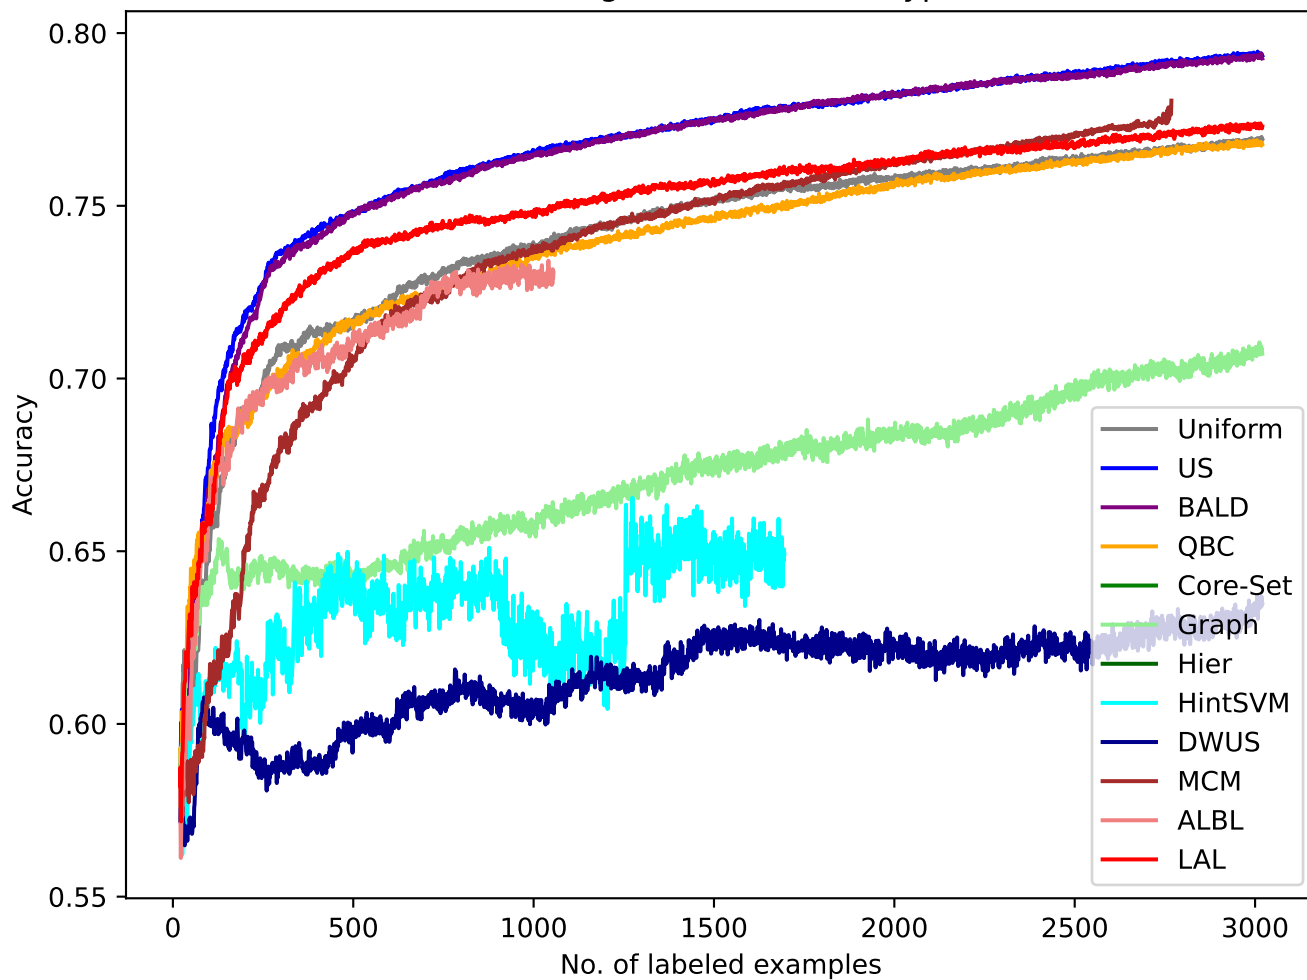

Supplement: supplementary_material [file attachment]

Difference of accuracy on Australian

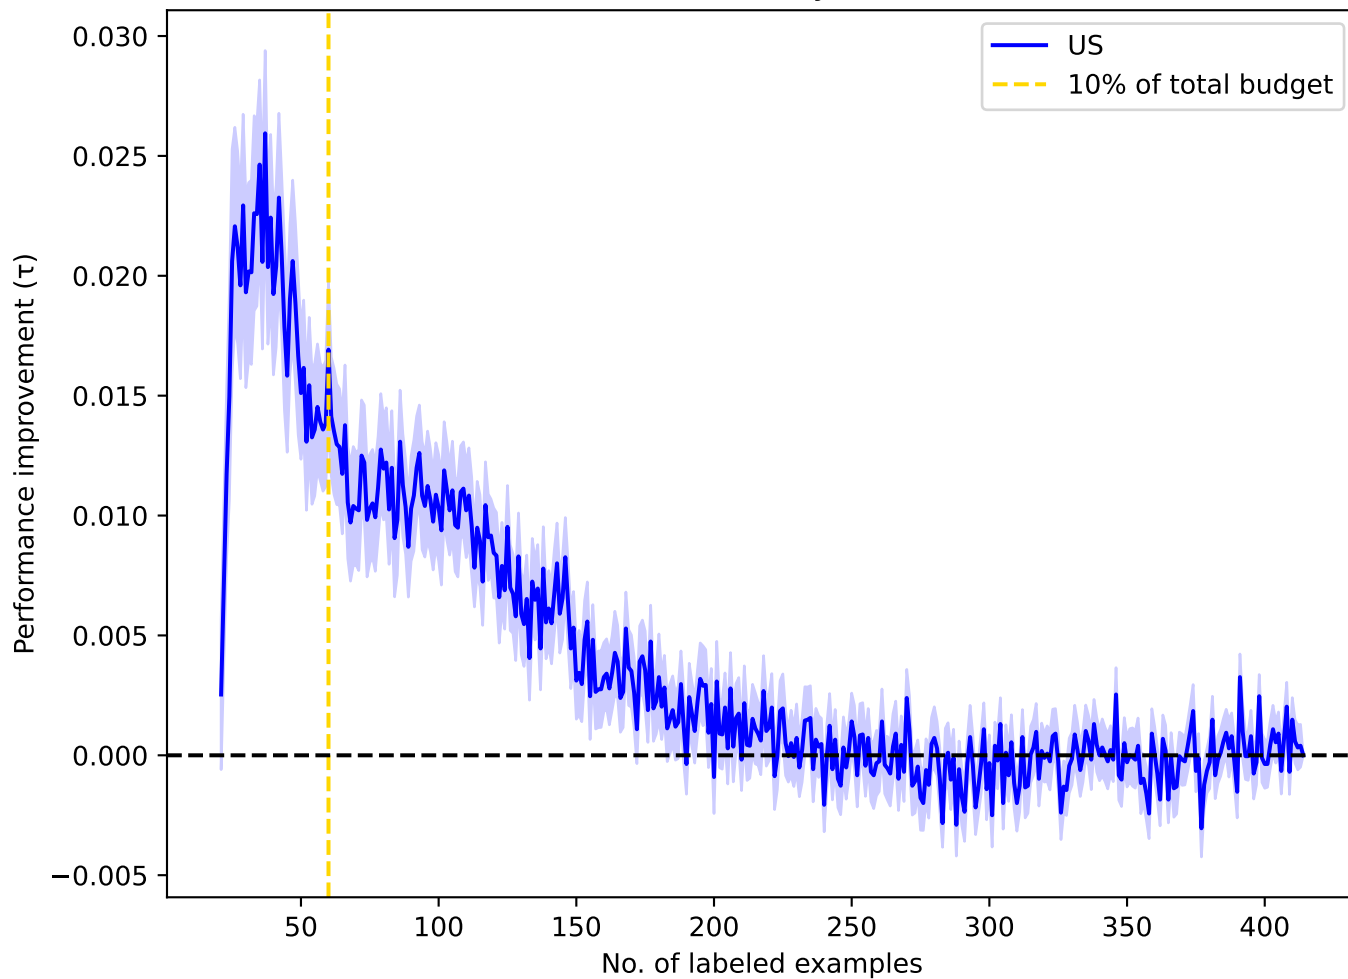

Supplement: supplementary_material [file attachment]

Difference of accuracy on Mammographic

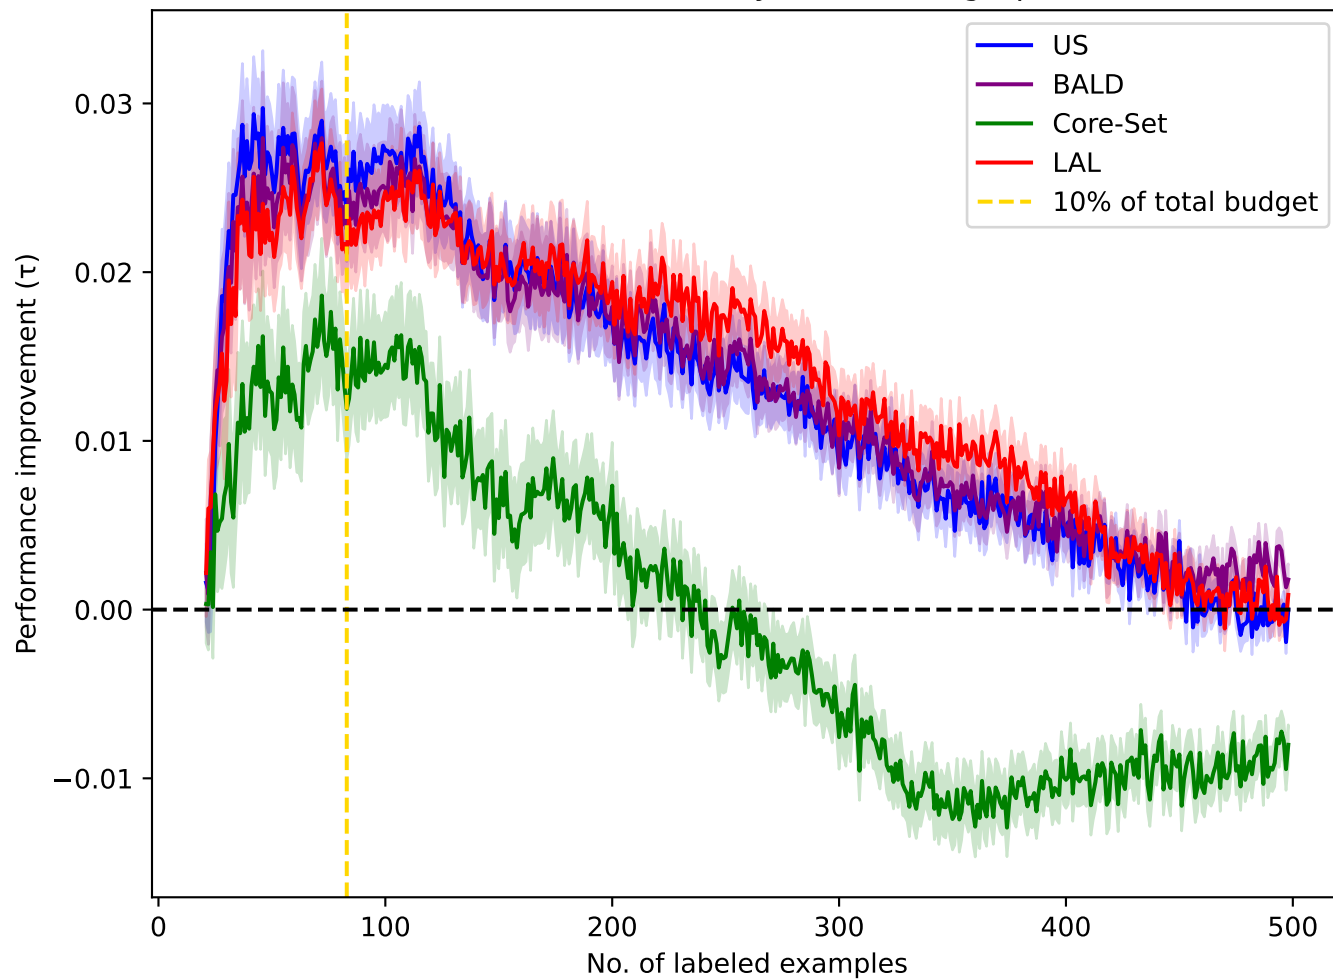

Supplement: supplementary_material [file attachment]

Learning curves on Gcloudb

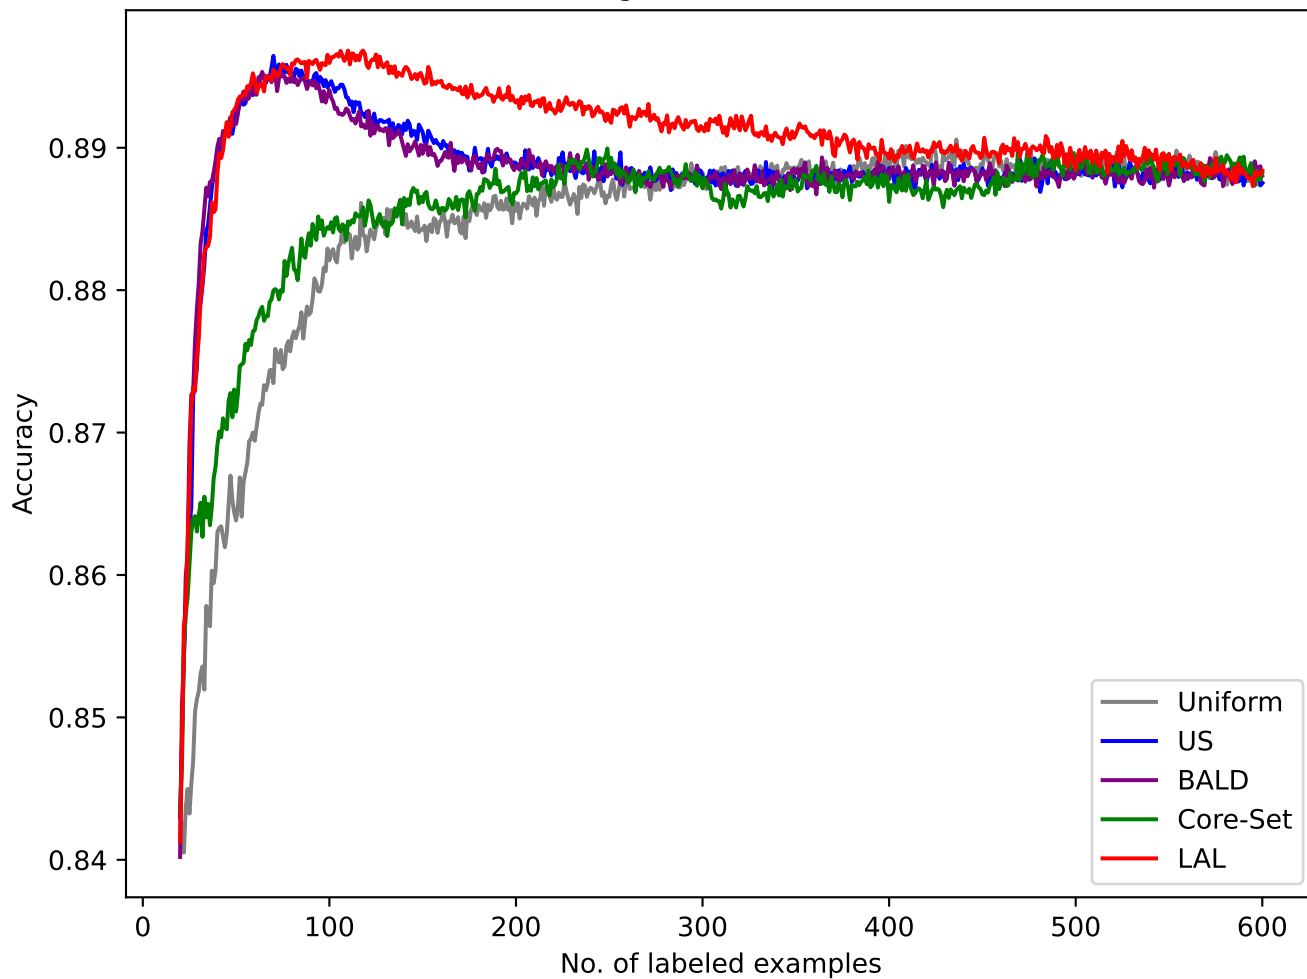

Supplement: supplementary_material [file attachment]

Difference of accuracy on Heart

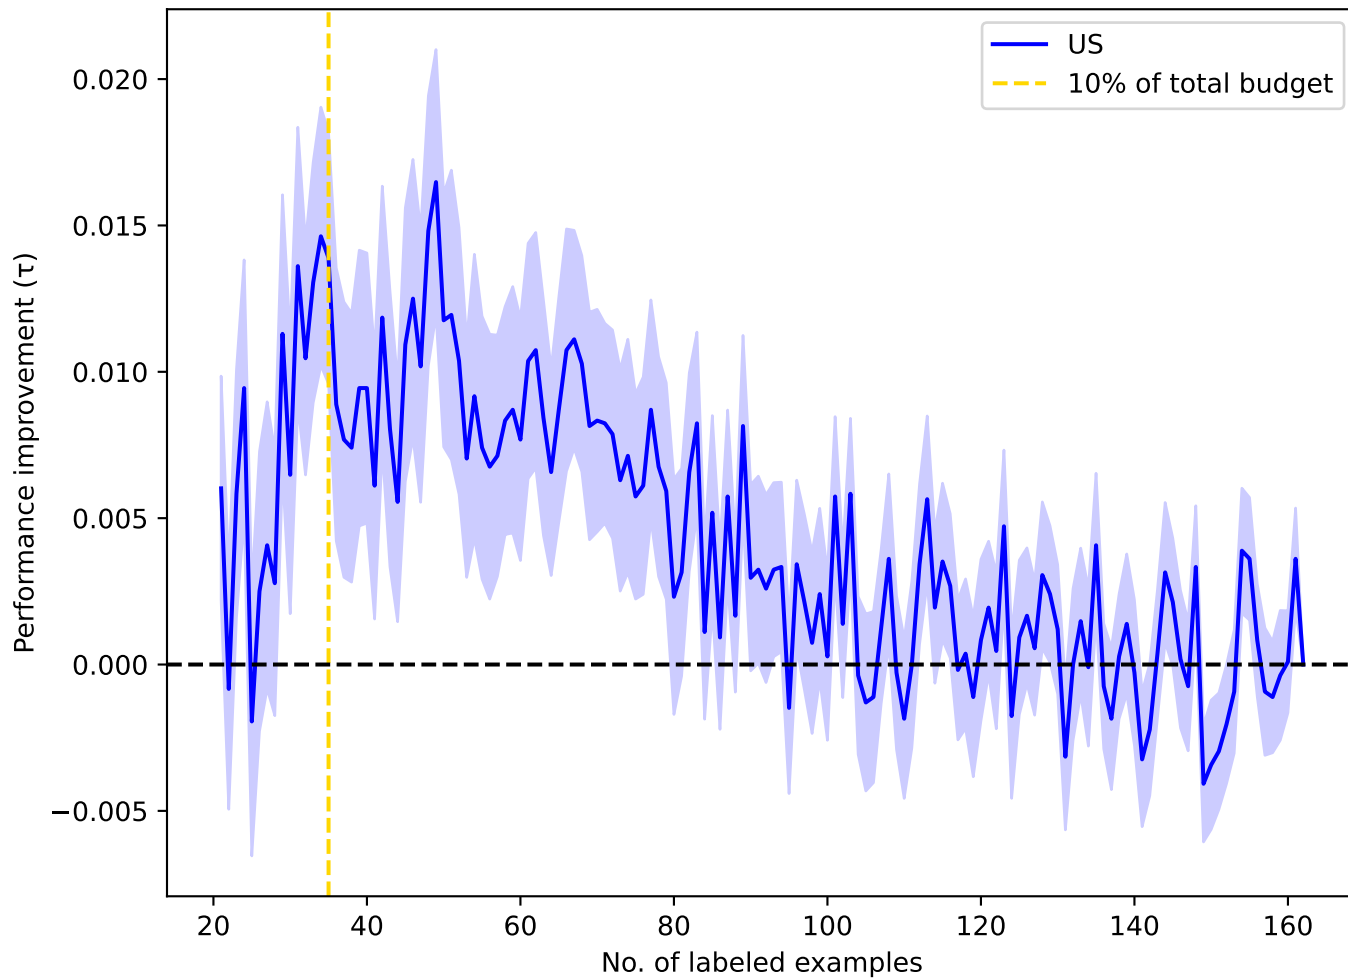

Supplement: supplementary_material [file attachment]

Learning curves on Clean1

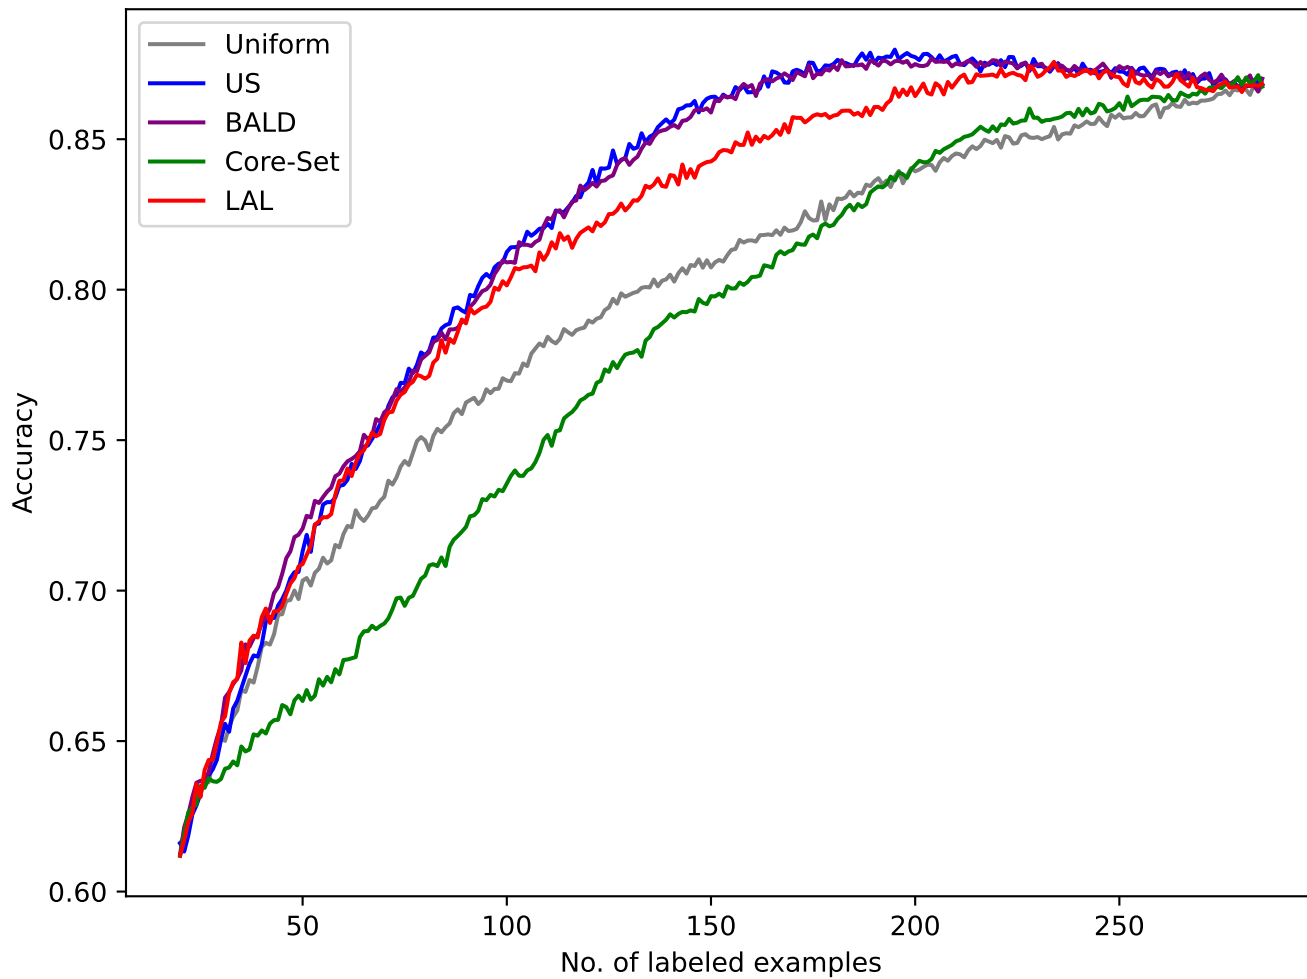

Supplement: supplementary_material [file attachment]

Learning curves on Pol

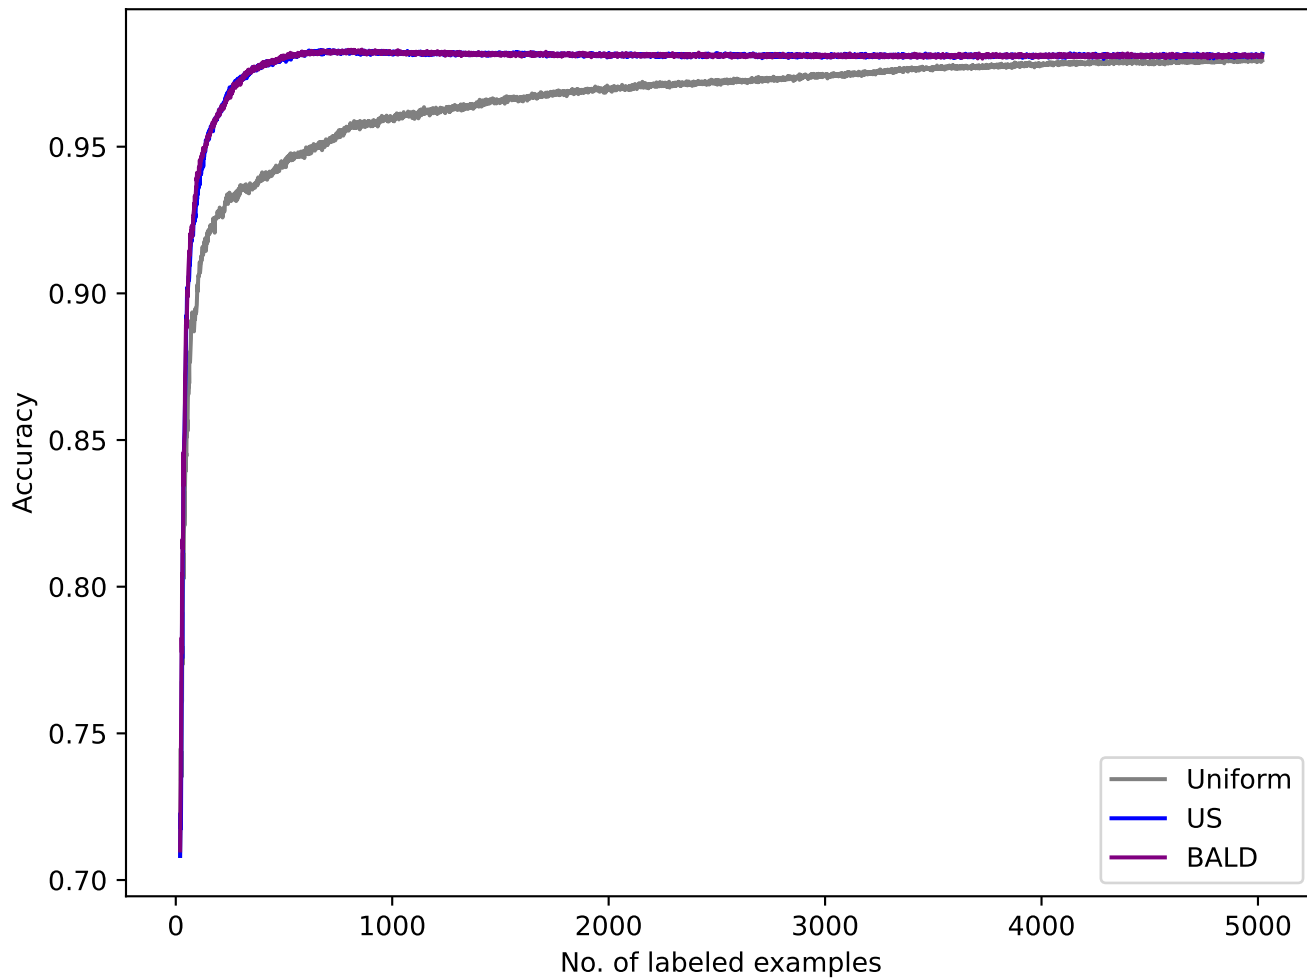

Supplement: supplementary_material [file attachment]

Learning curves with 95% C.I. on Phishing

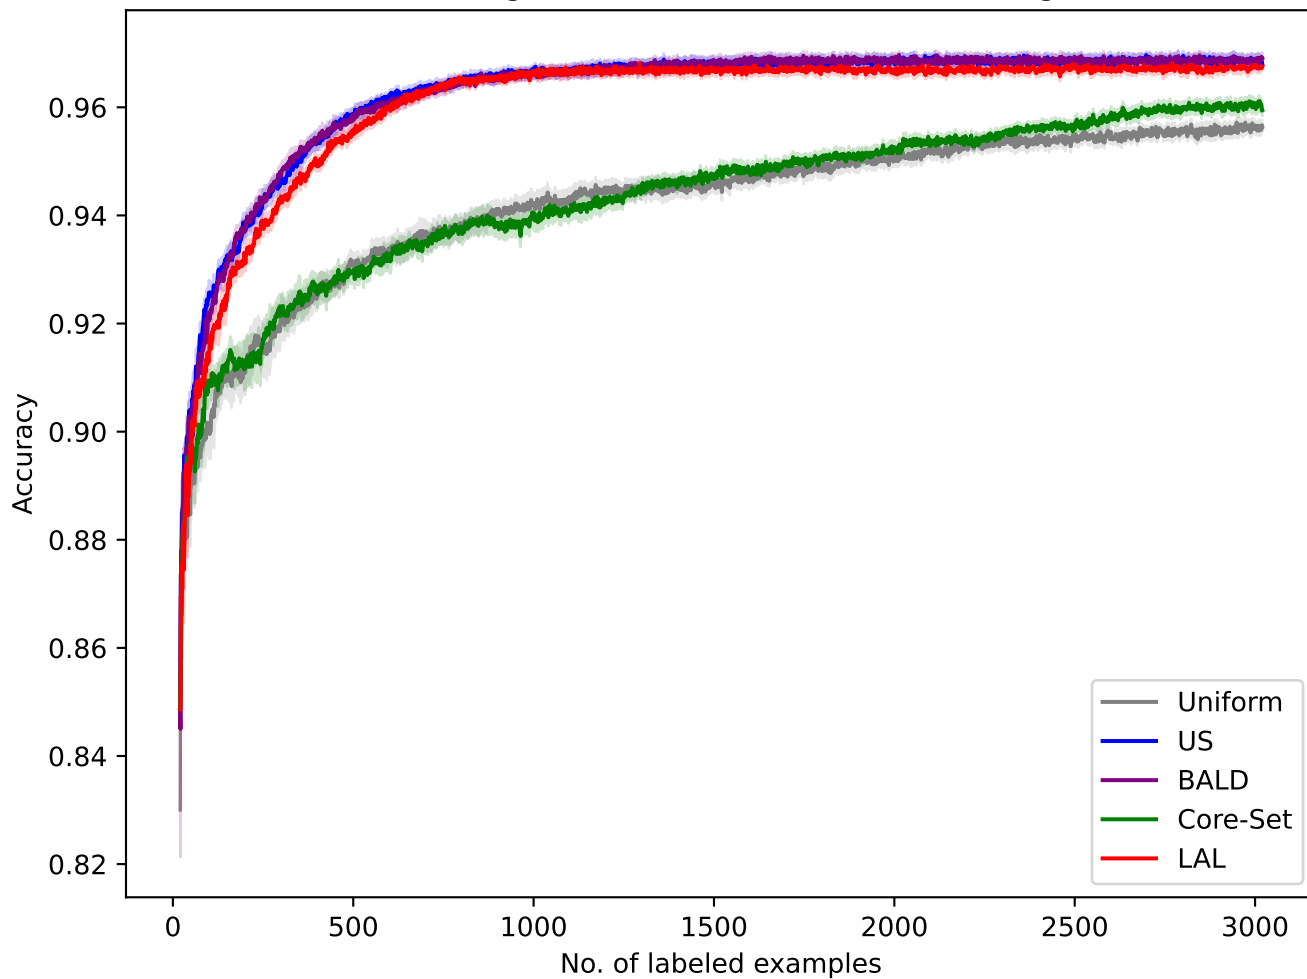

Supplement: supplementary_material [file attachment]

Learning curves on Splice

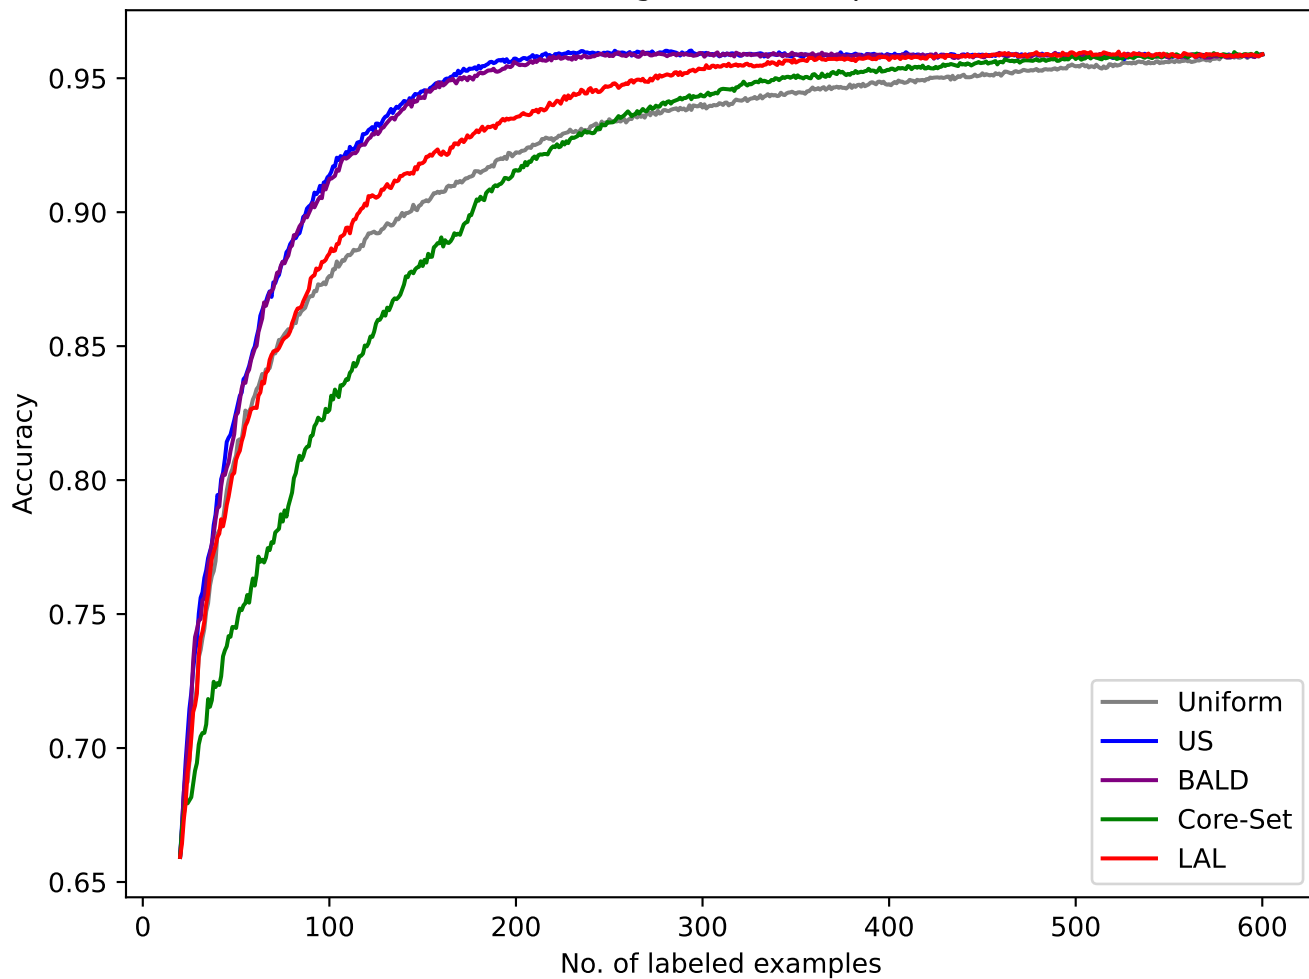

Supplement: supplementary_material [file attachment]

Learning curves with 95% C.I. on Ringnorm

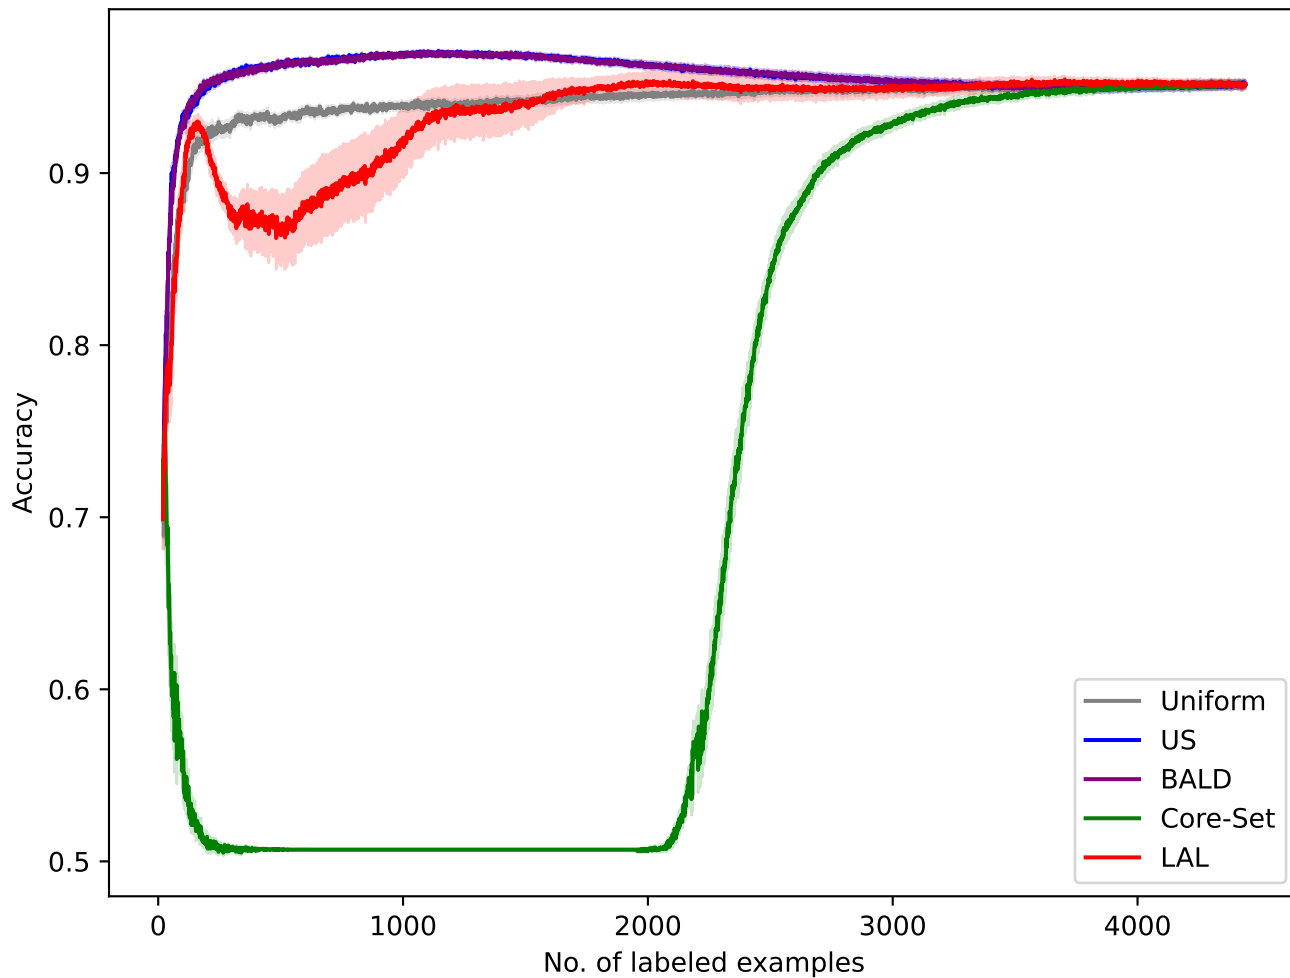

Supplement: supplementary_material [file attachment]

## Learning curves on Clean1

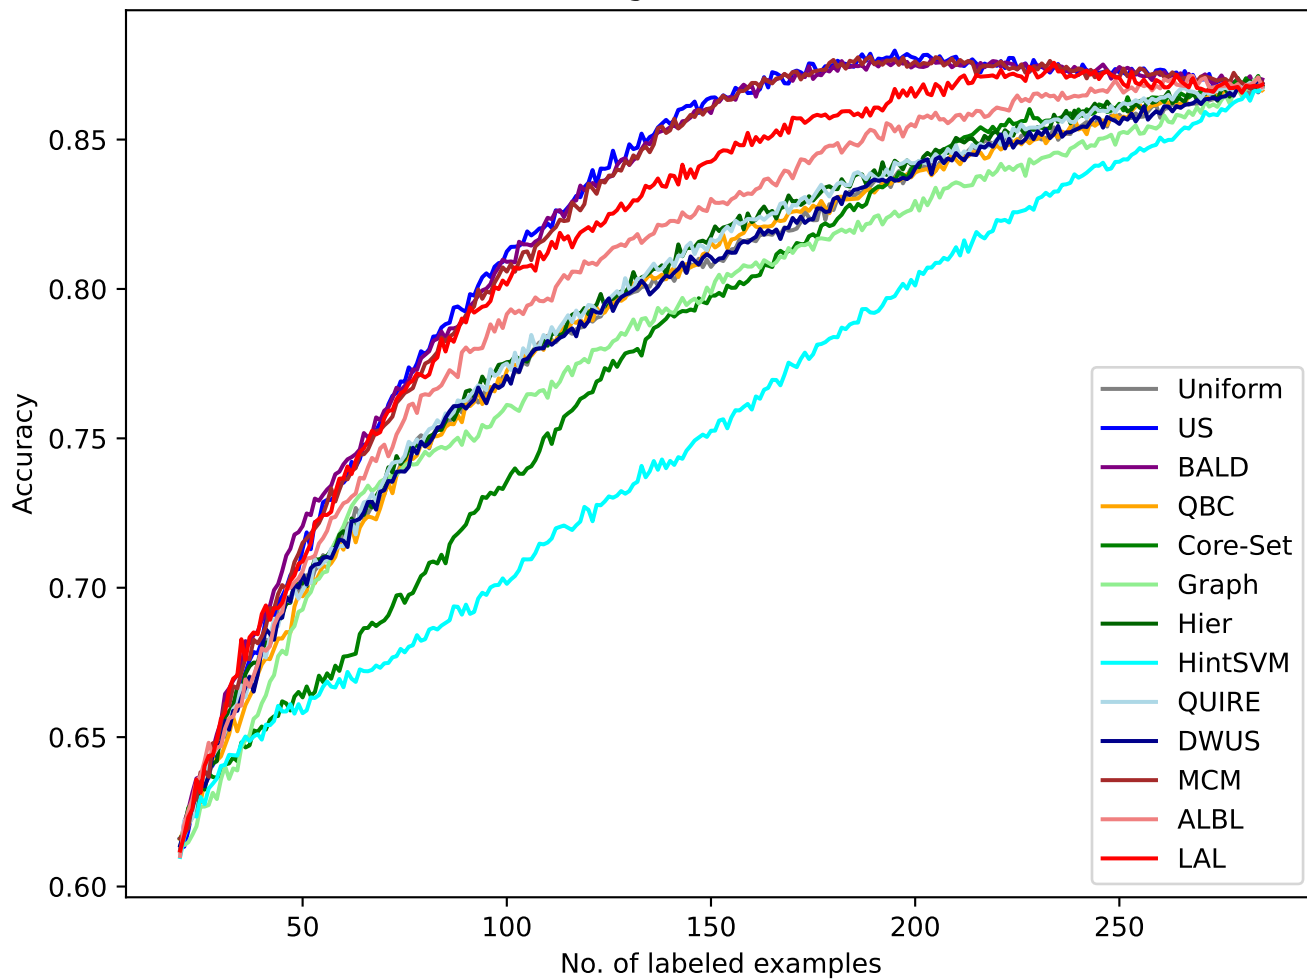

Supplement: supplementary_material [file attachment]

Learning curves with 95% C.I. on Ionosphere

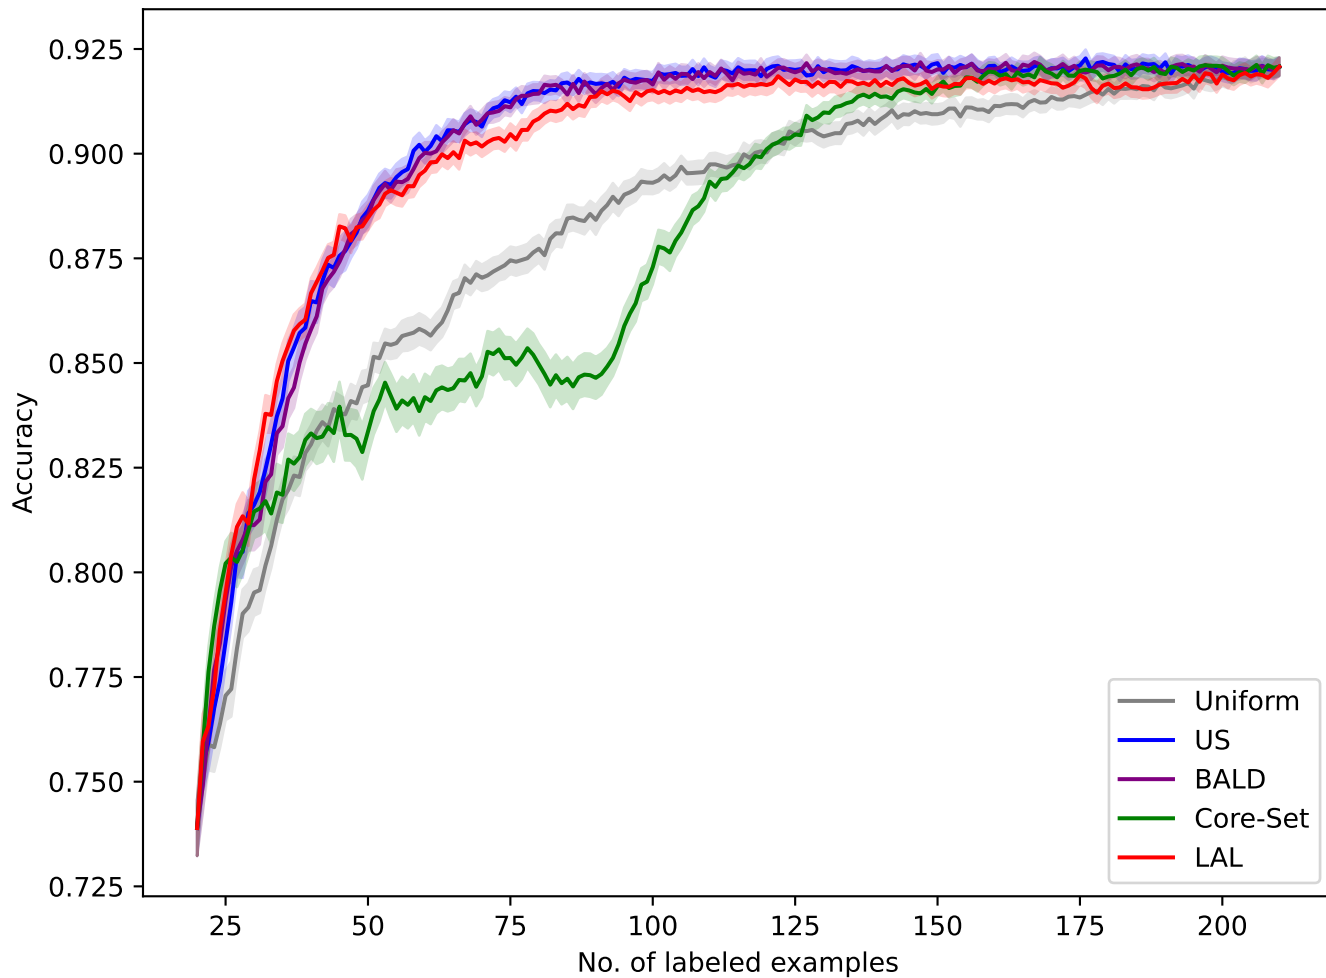

Supplement: supplementary_material [file attachment]

Learning curves with 95% C.I. on Phoneme

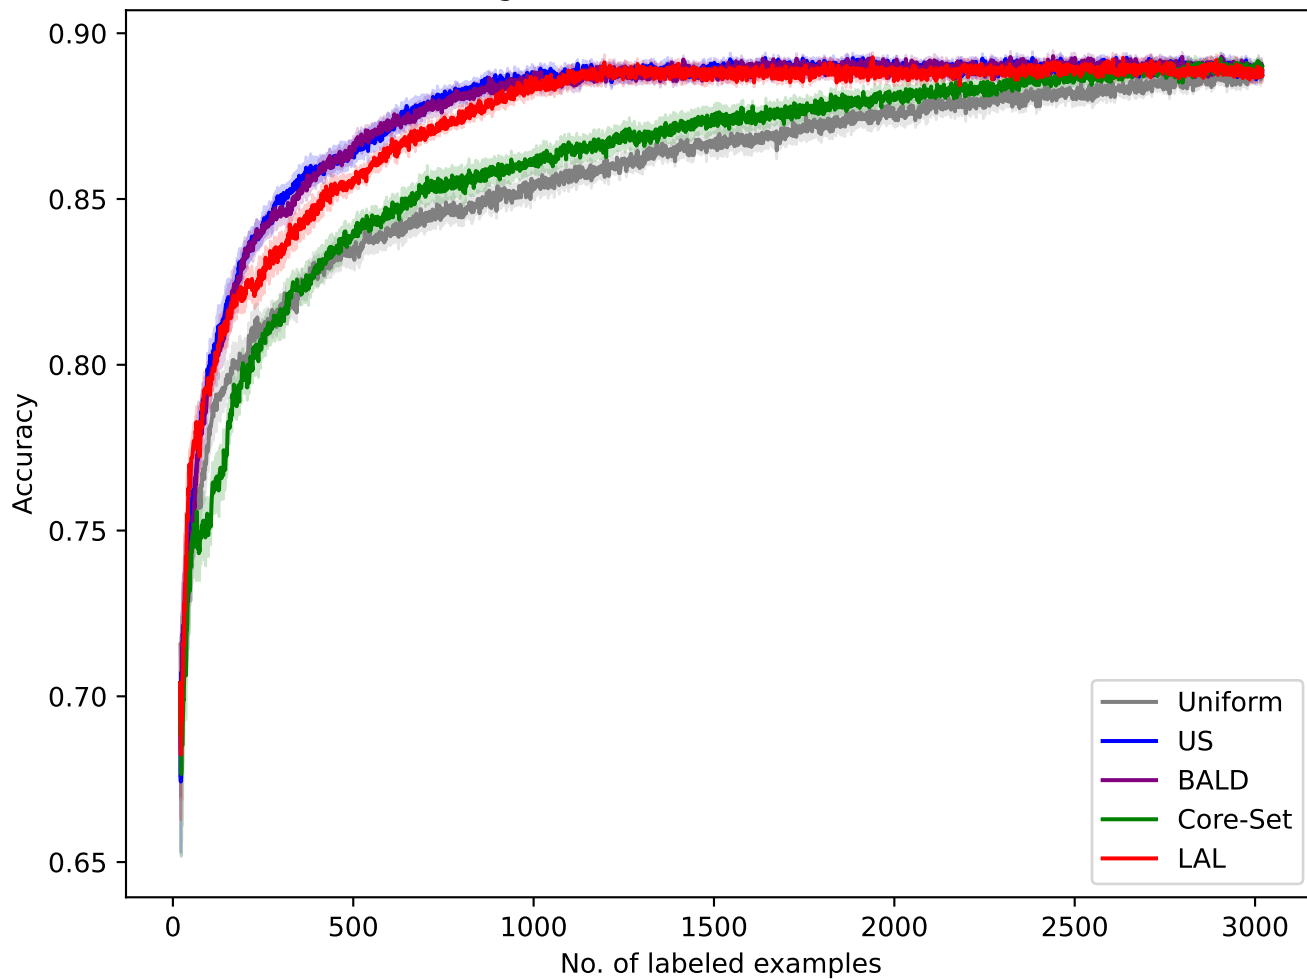

Supplement: supplementary_material [file attachment]

Difference of accuracy on Sonar

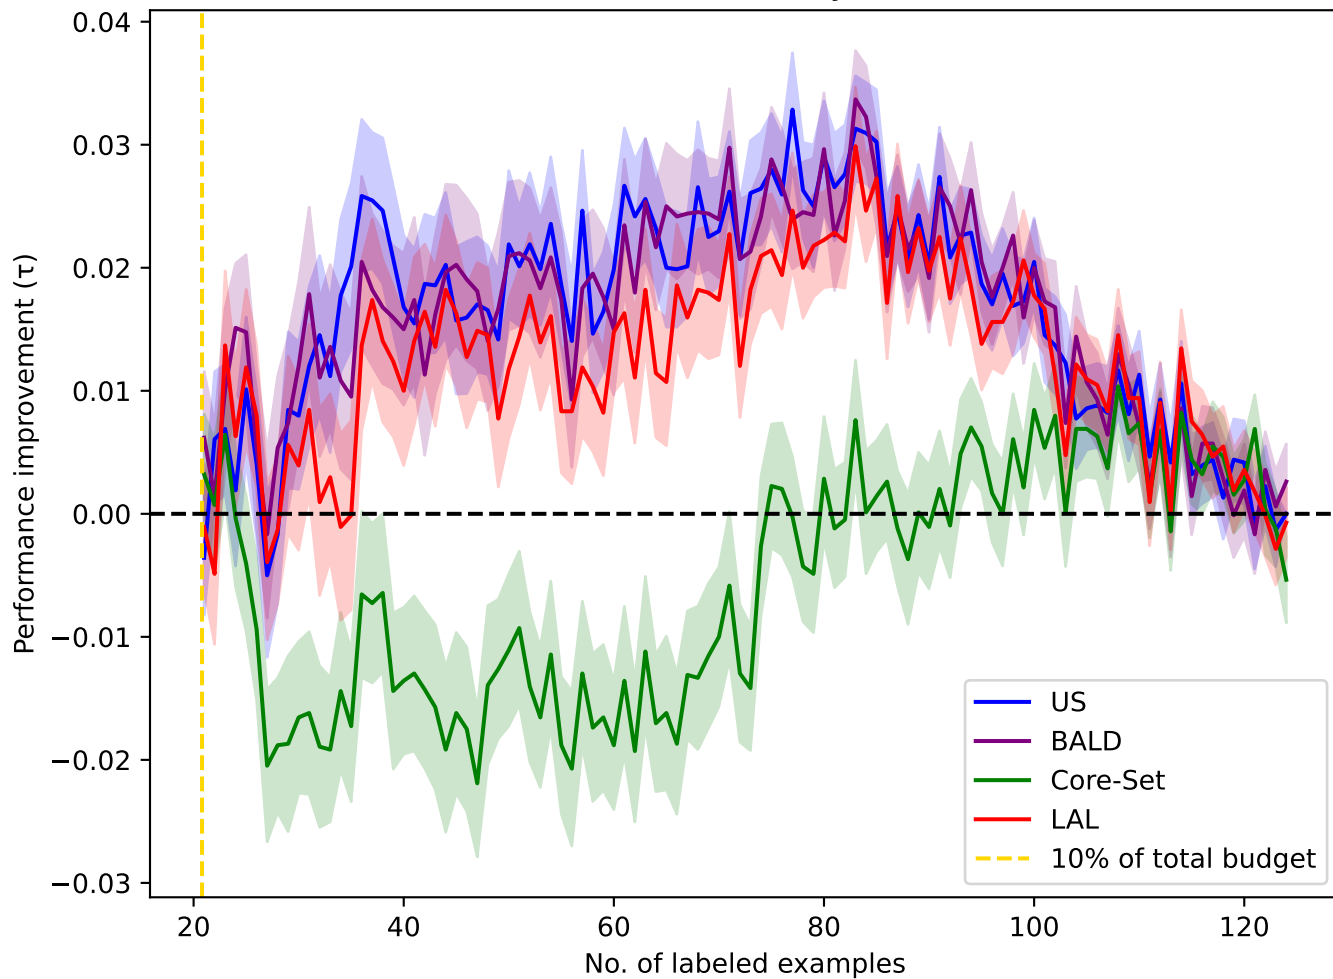

Supplement: supplementary_material [file attachment]

Learning curves on Ex8a

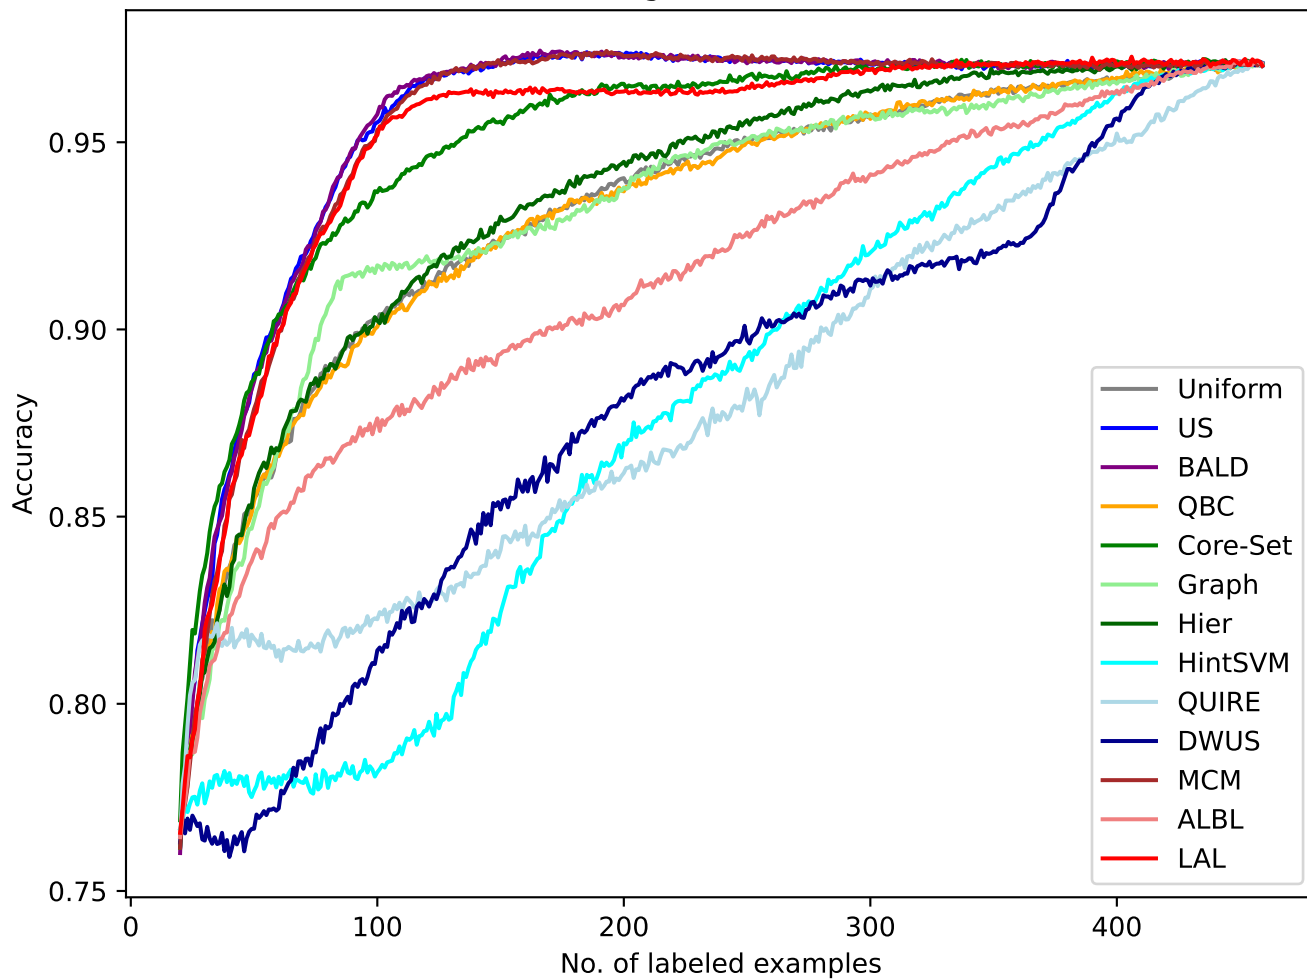

Supplement: supplementary_material [file attachment]

Learning curves on Diabetes

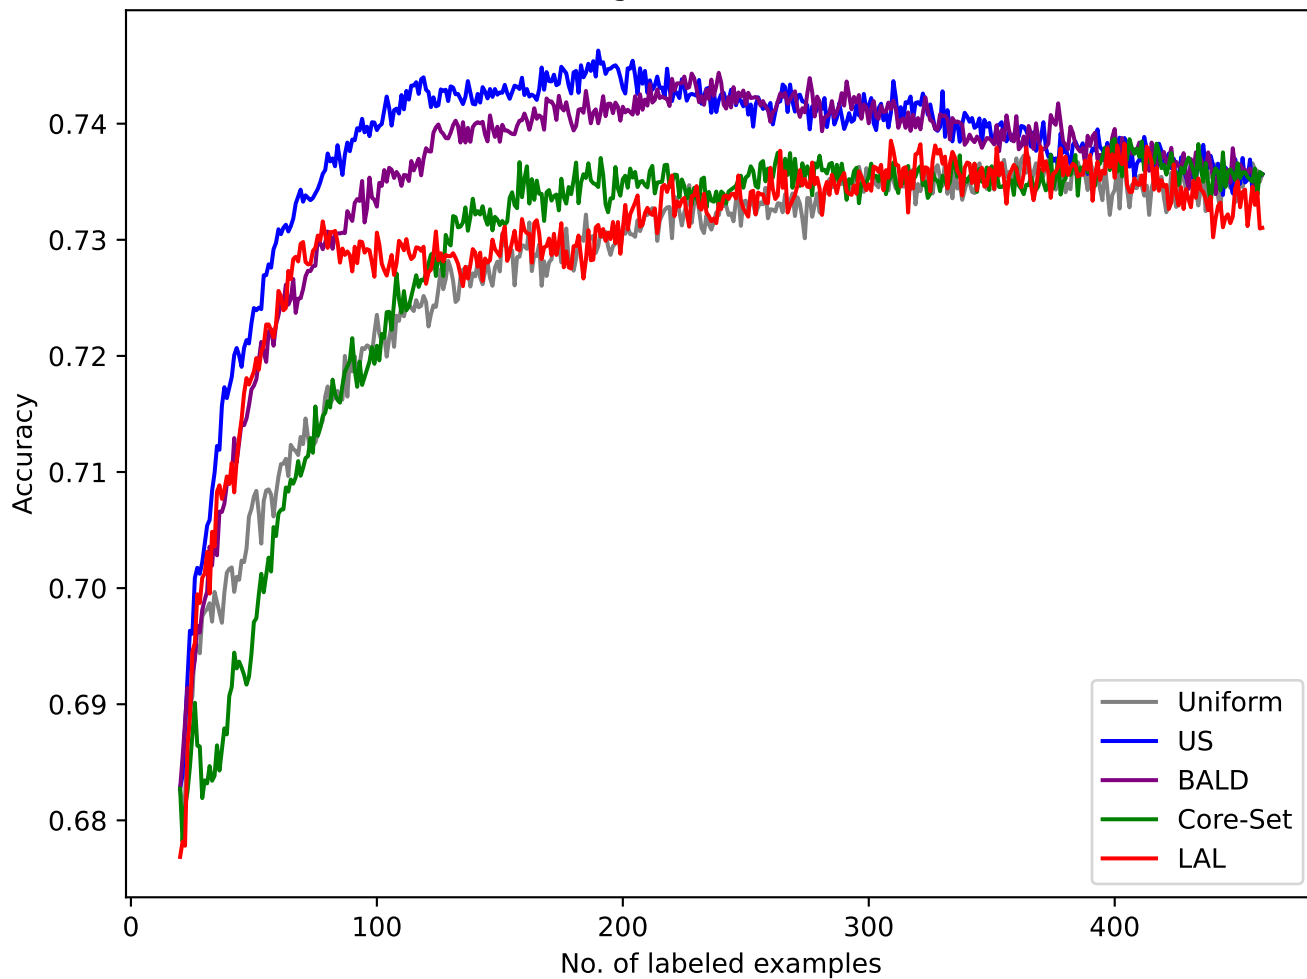

Supplement: supplementary_material [file attachment]

Learning curves on Gcloudub

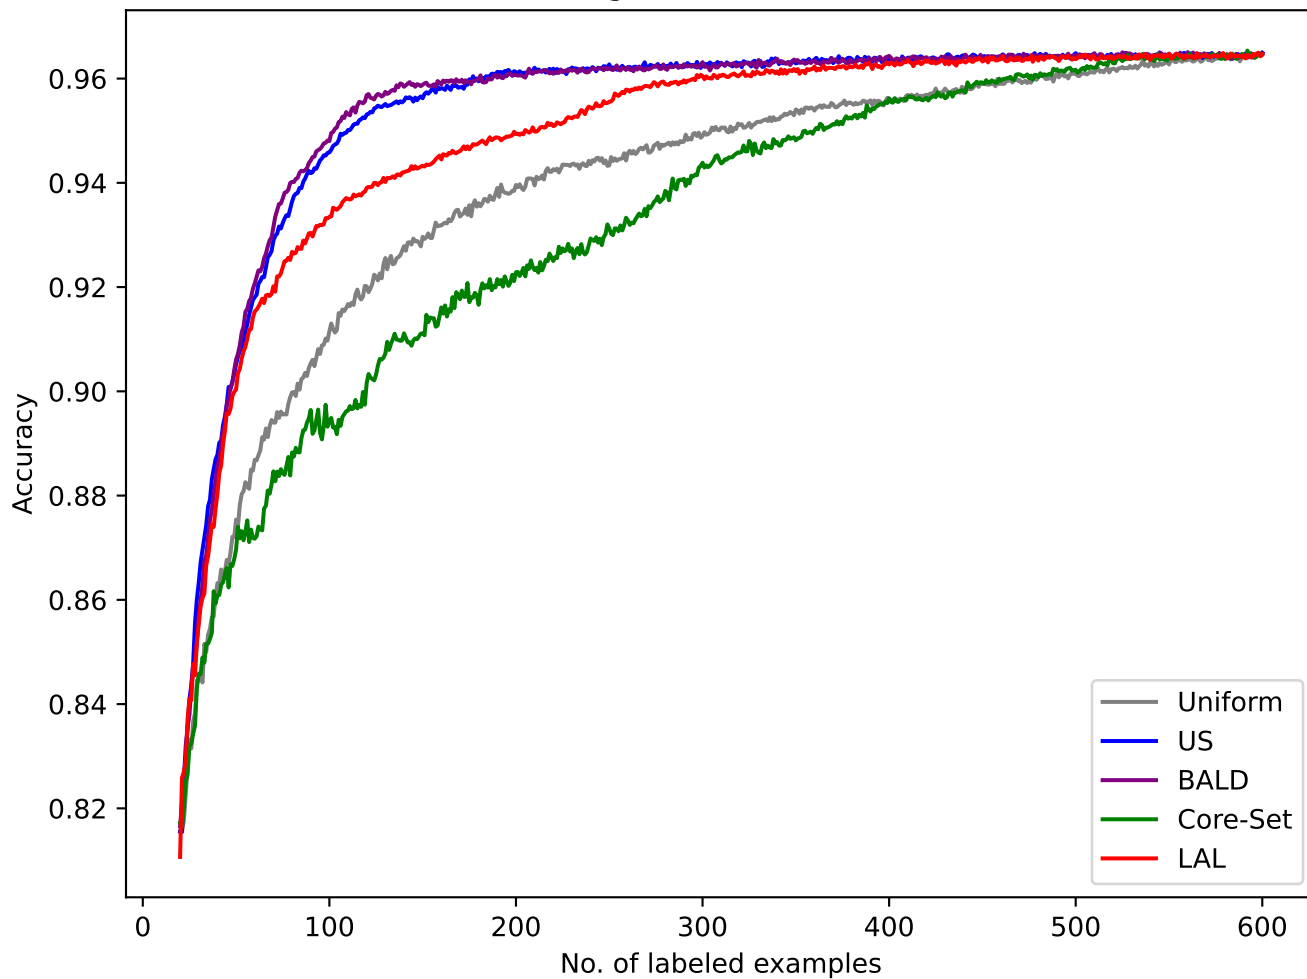

Supplement: supplementary_material [file attachment]

Learning curves on Banana

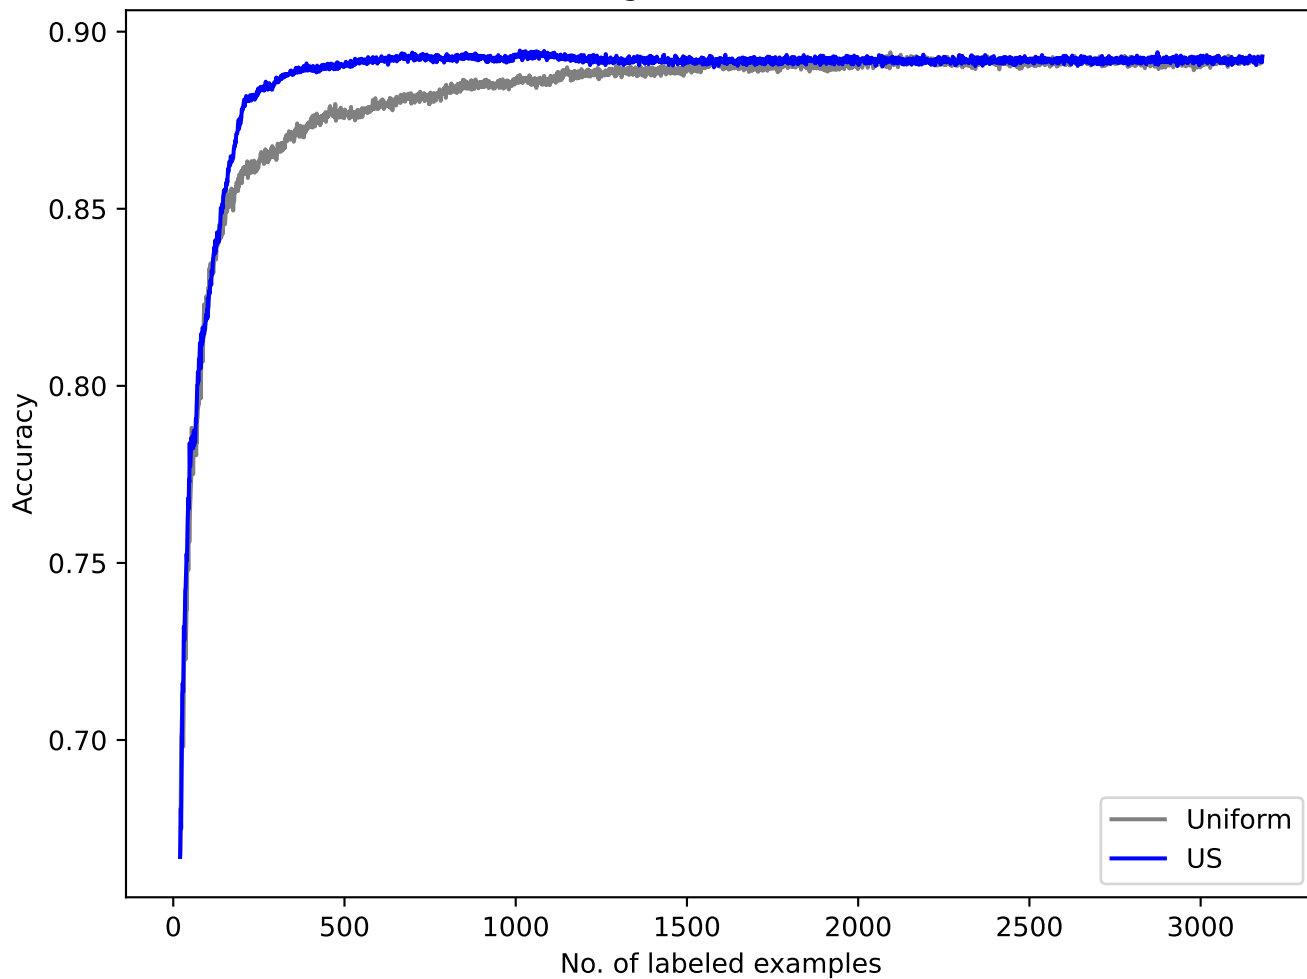

Supplement: supplementary_material [file attachment]

Learning curves on Bioresponse

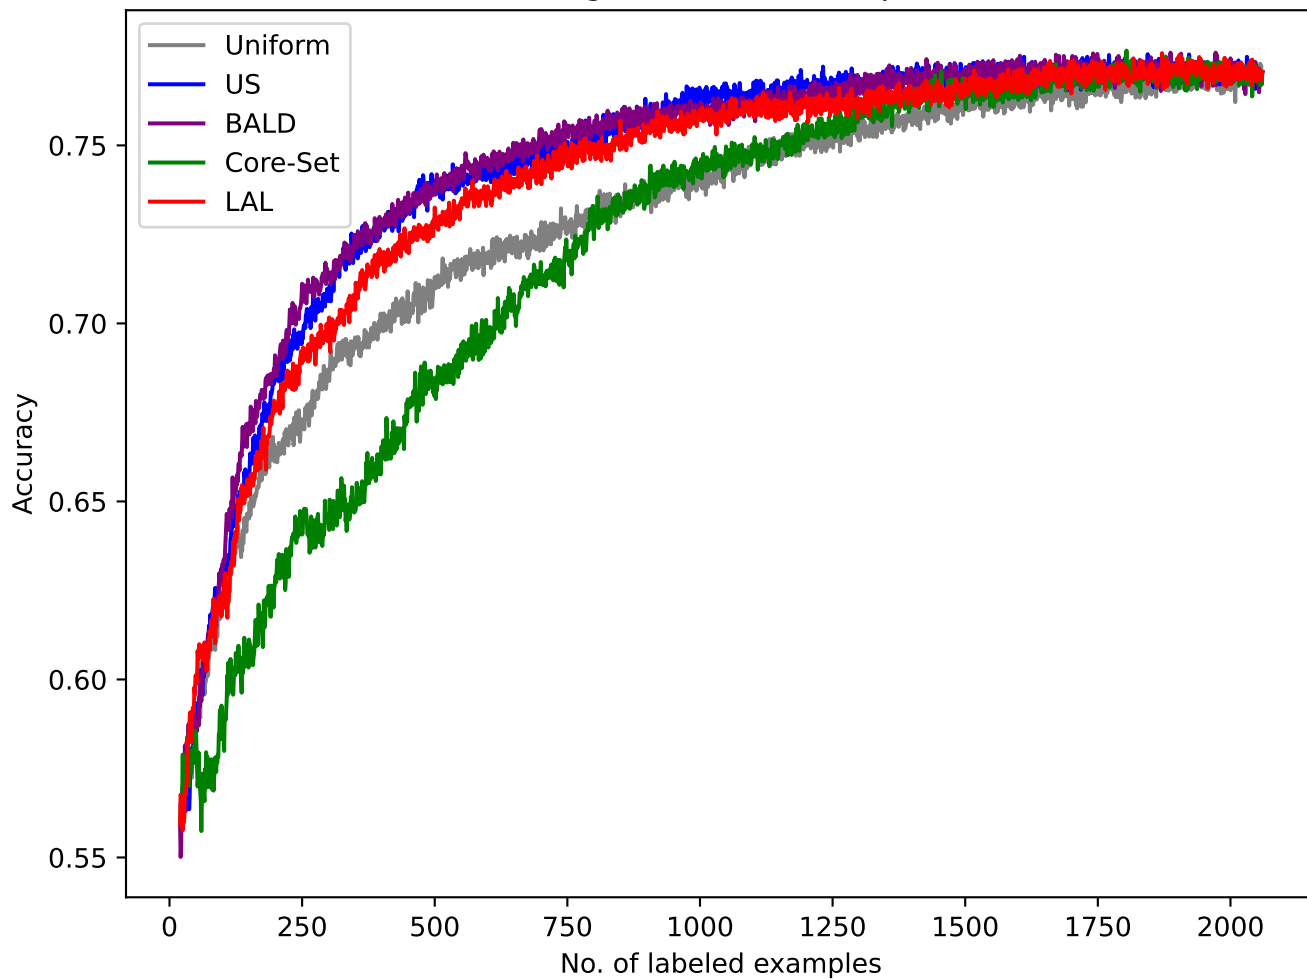

Supplement: supplementary_material [file attachment]

Difference of accuracy on Phoneme

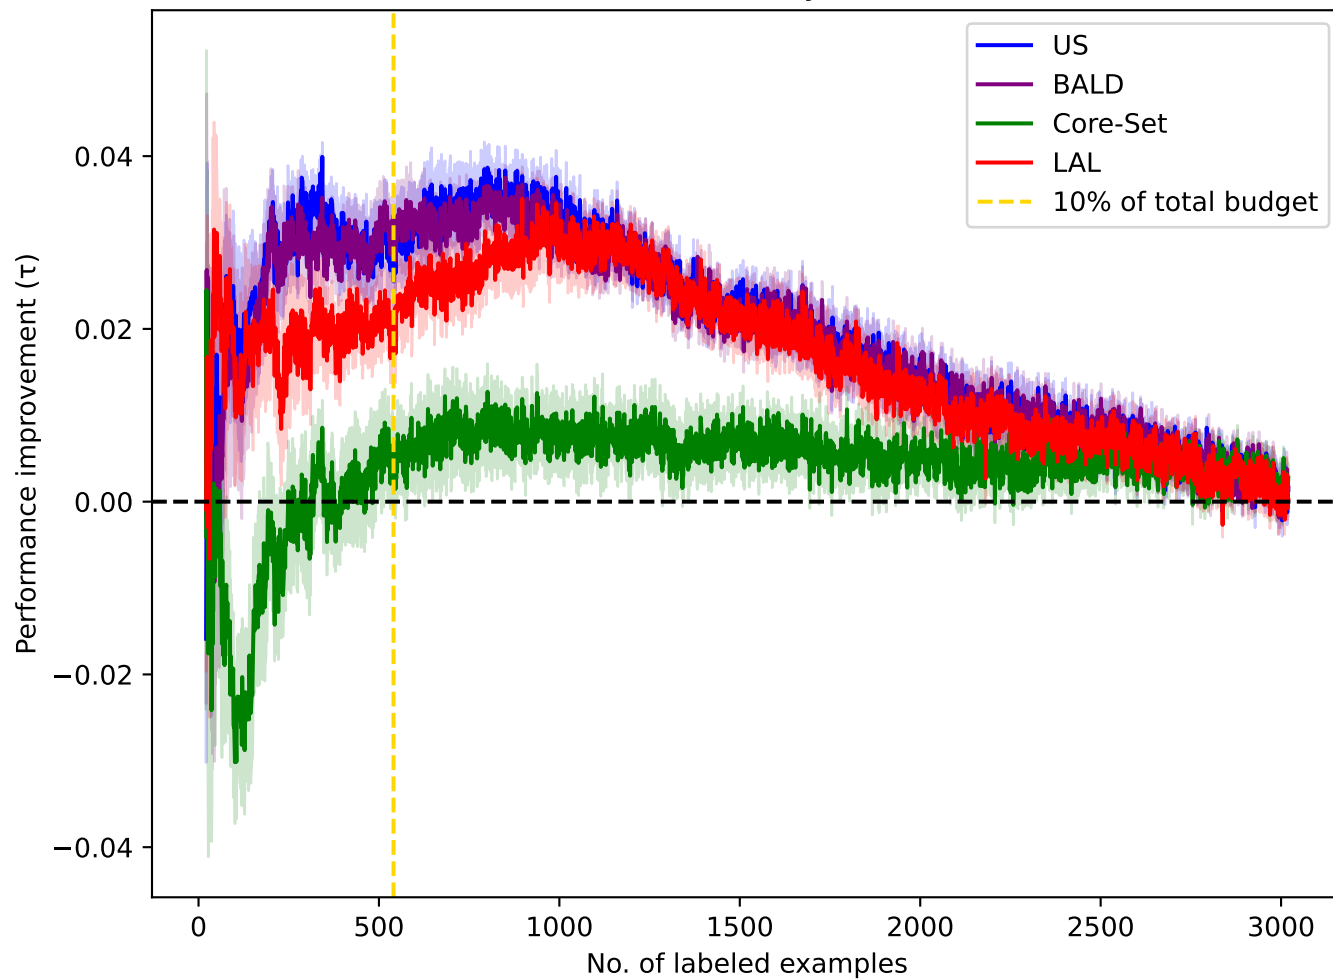

Supplement: supplementary_material [file attachment]

Learning curves on Splice

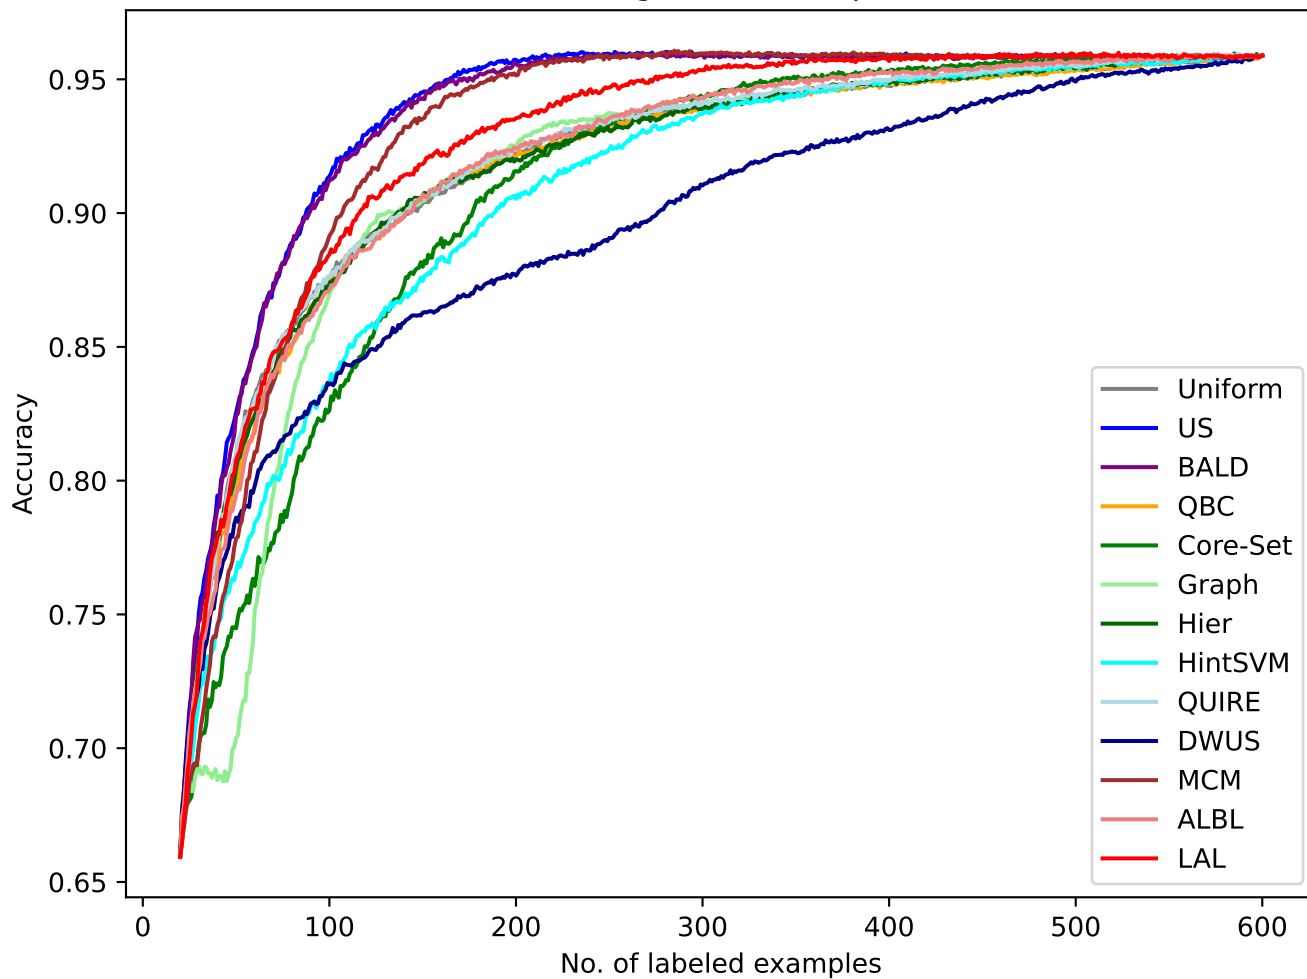

Supplement: supplementary_material [file attachment]

Difference of accuracy on Appendicitis

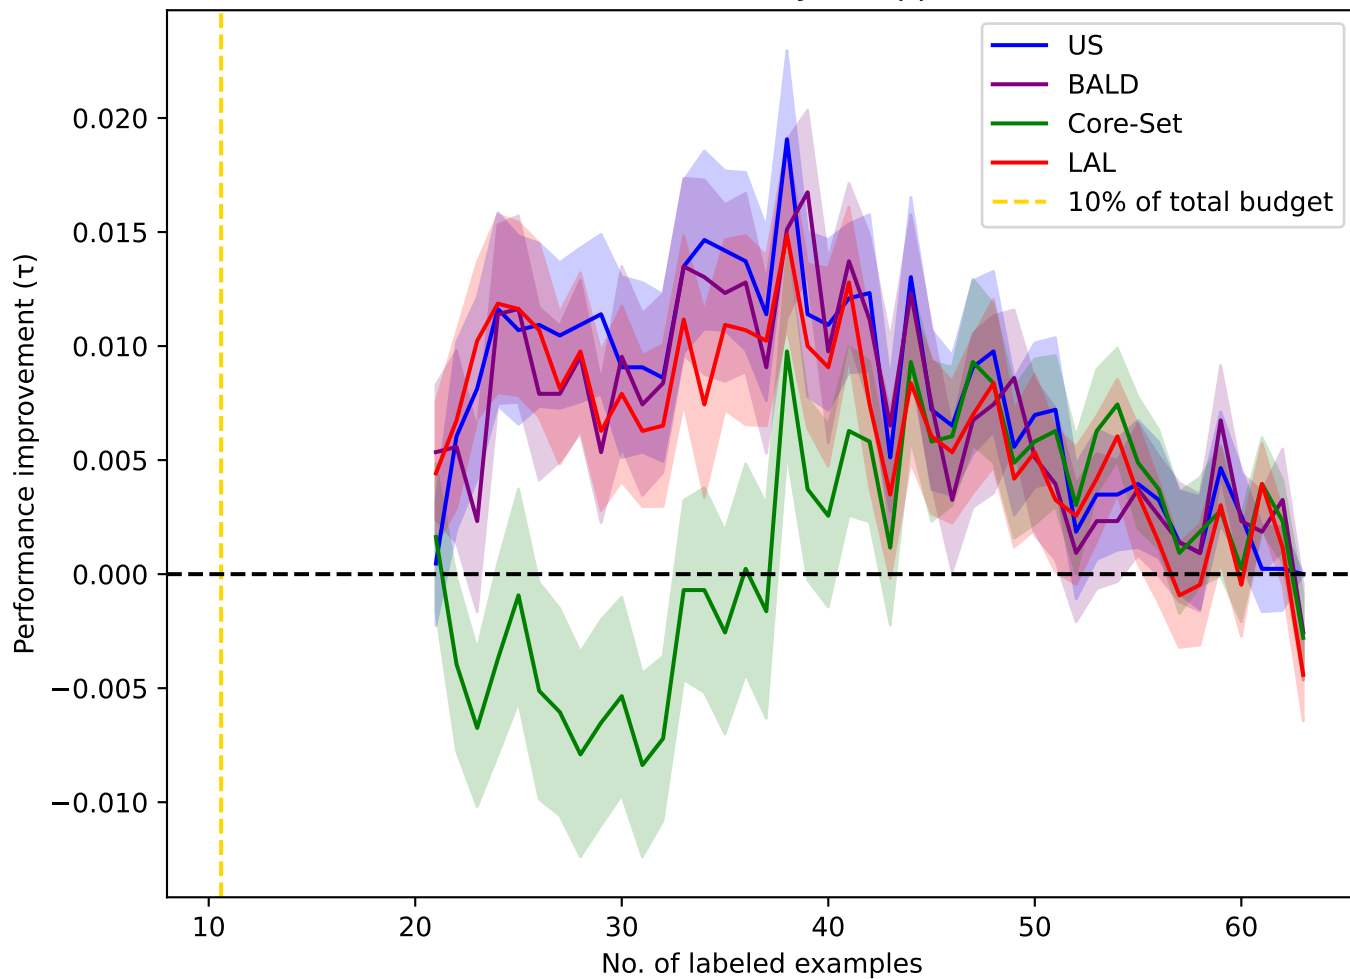

Supplement: supplementary_material [file attachment]

Difference of accuracy on Ionosphere

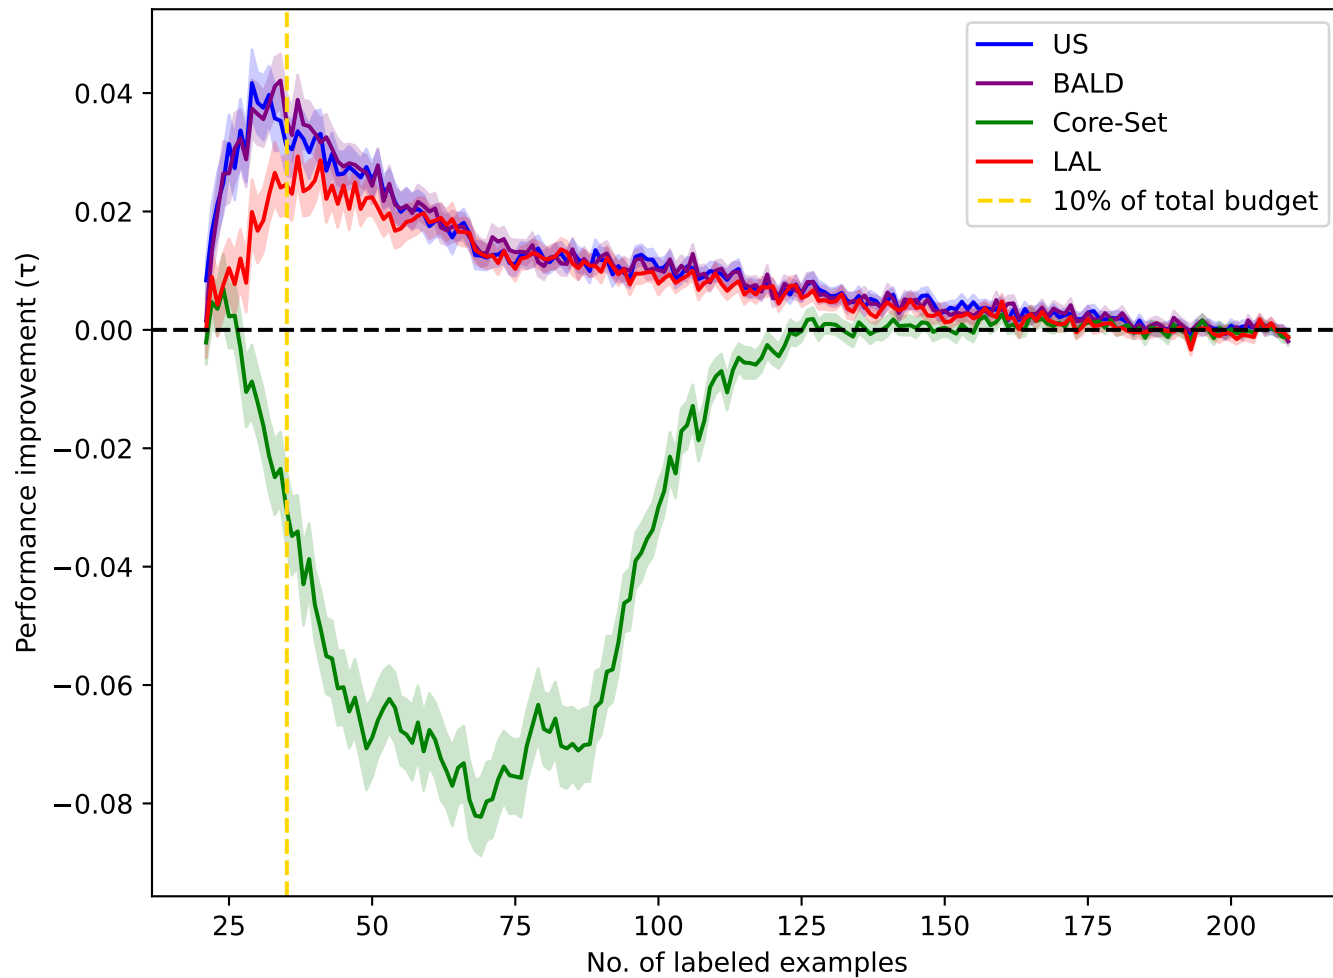

Supplement: supplementary_material [file attachment]

Difference of accuracy on Parkinsons

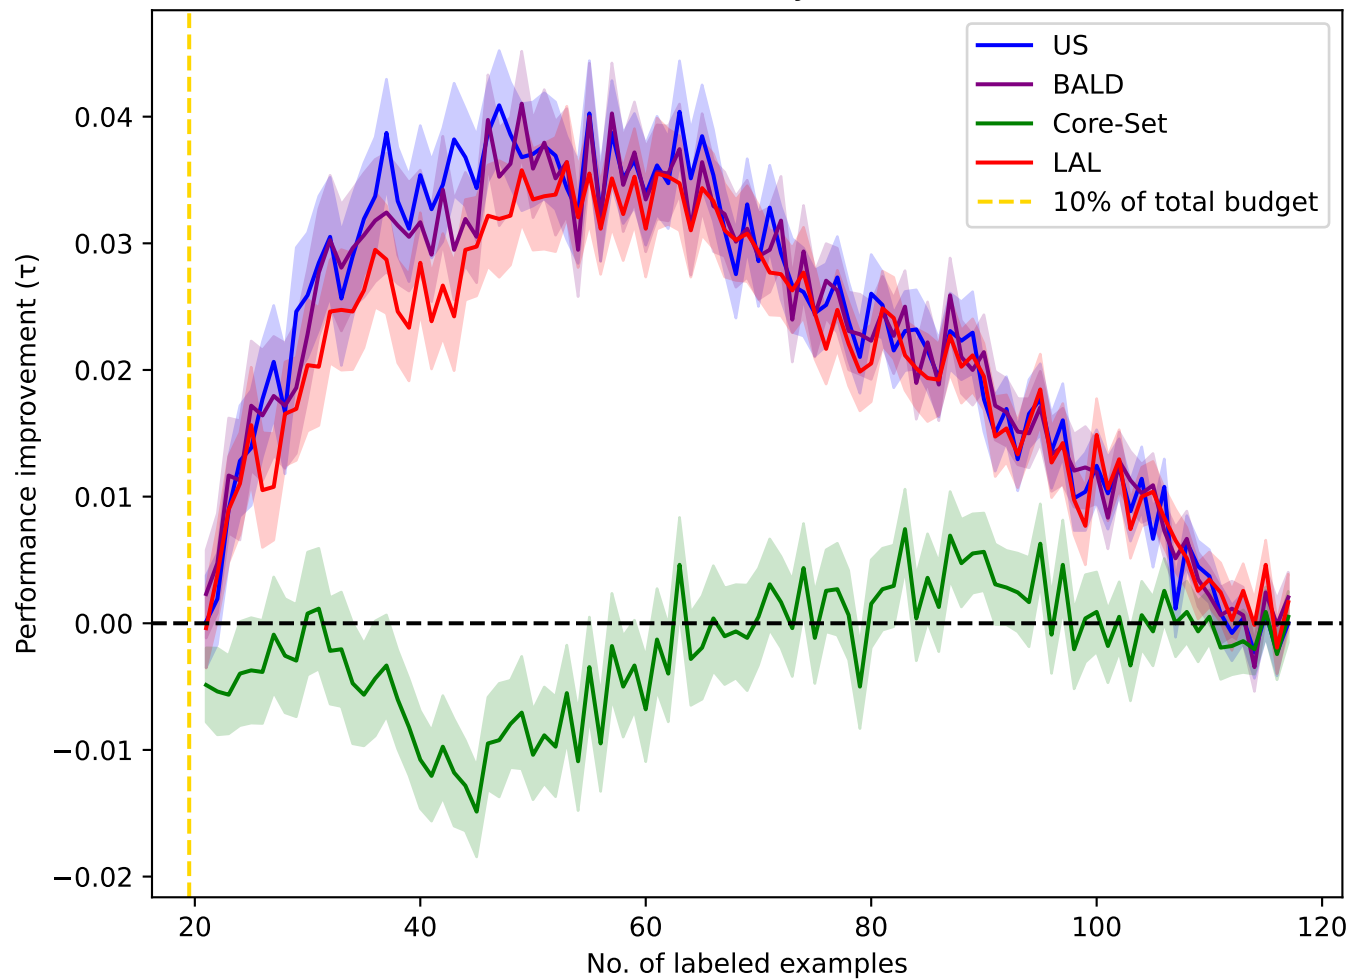

Supplement: supplementary_material [file attachment]

Learning curves on Heart

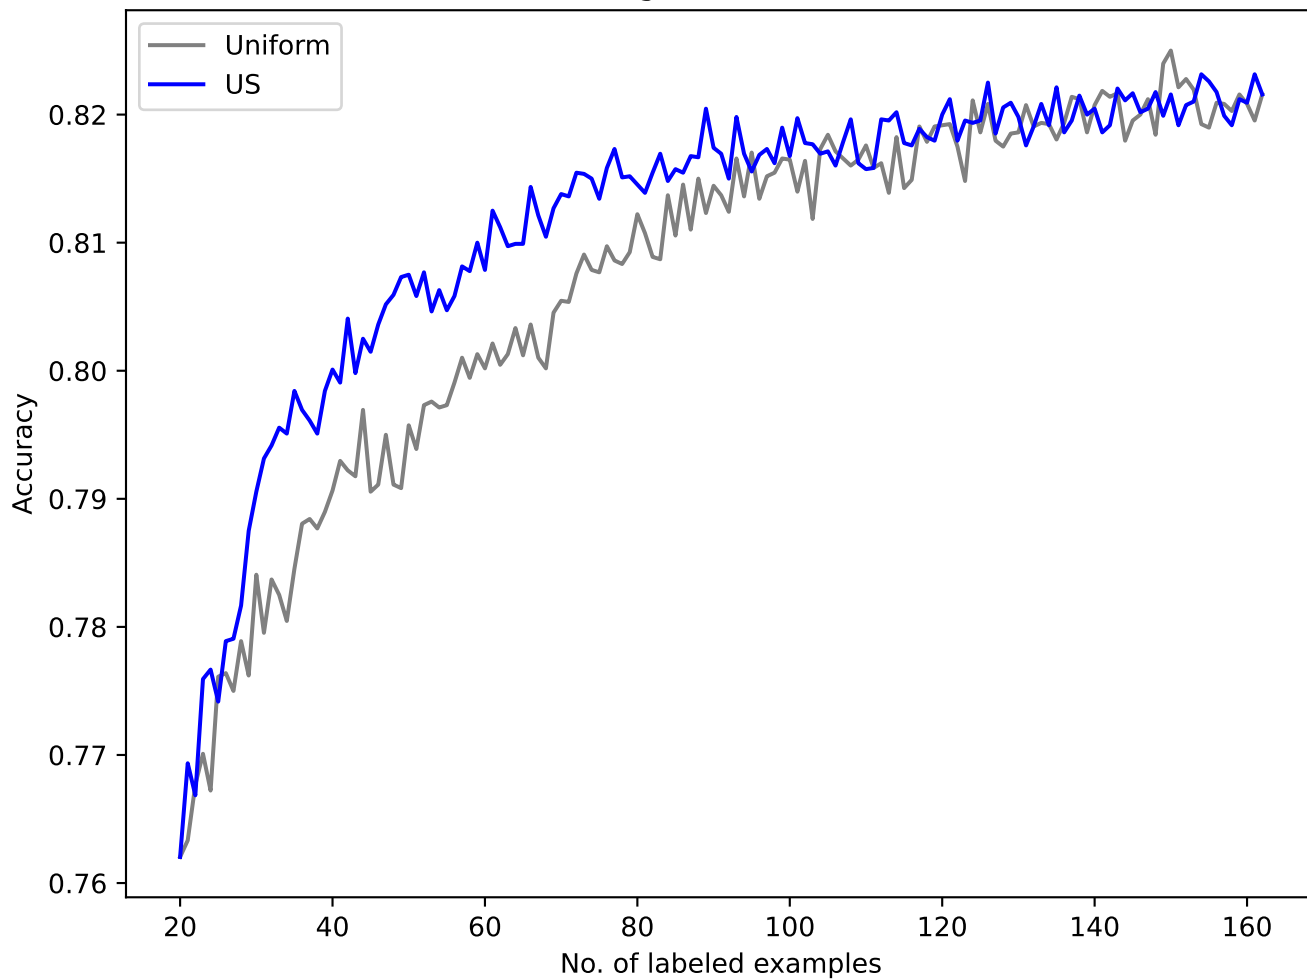

Supplement: supplementary_material [file attachment]

Learning curves with 95% C.I. on Parkinsons

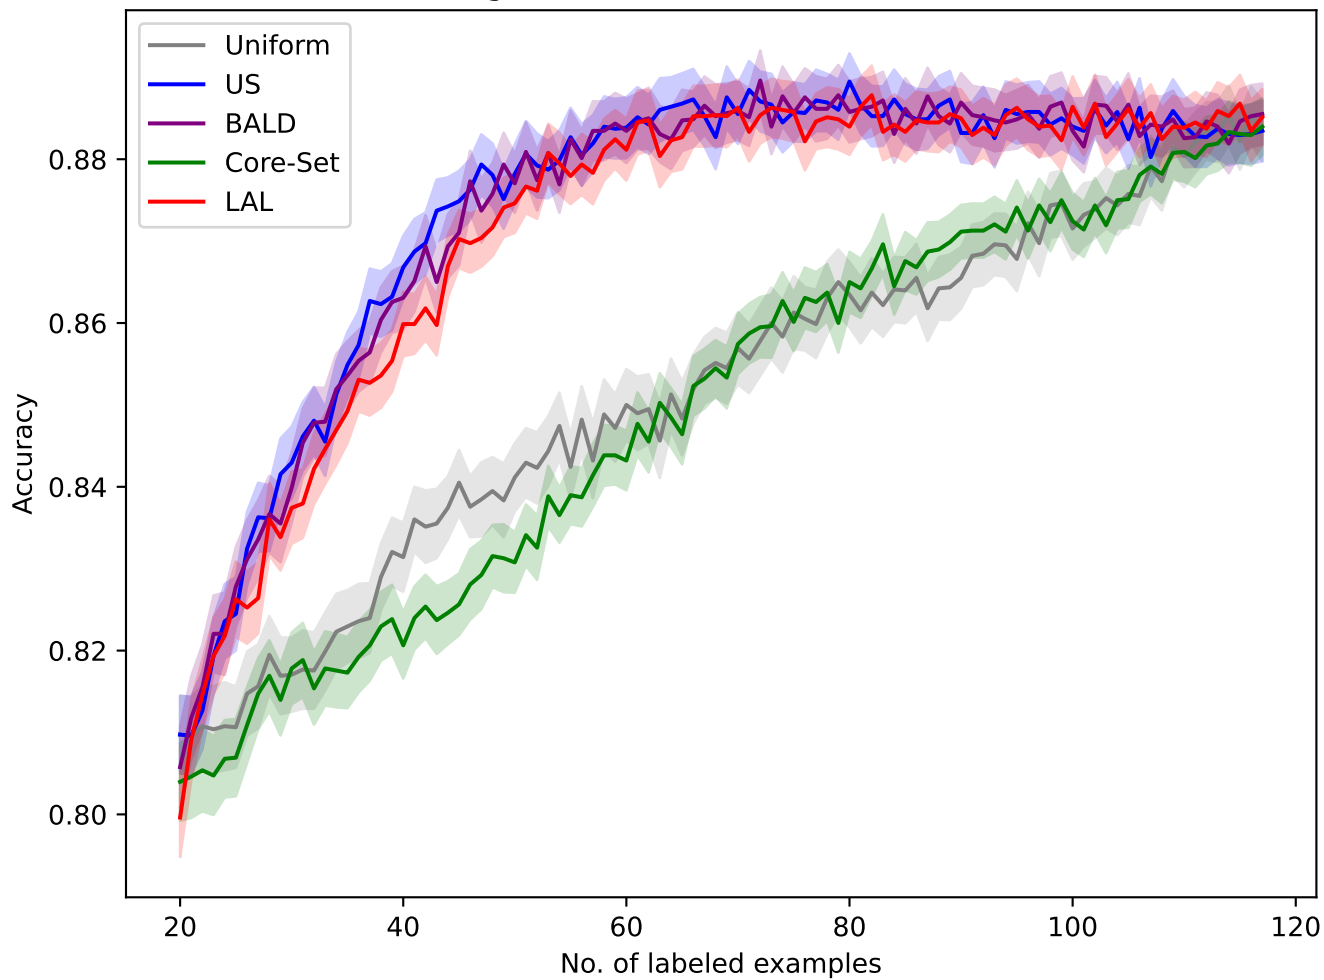

Supplement: supplementary_material [file attachment]

Learning curves on Phoneme

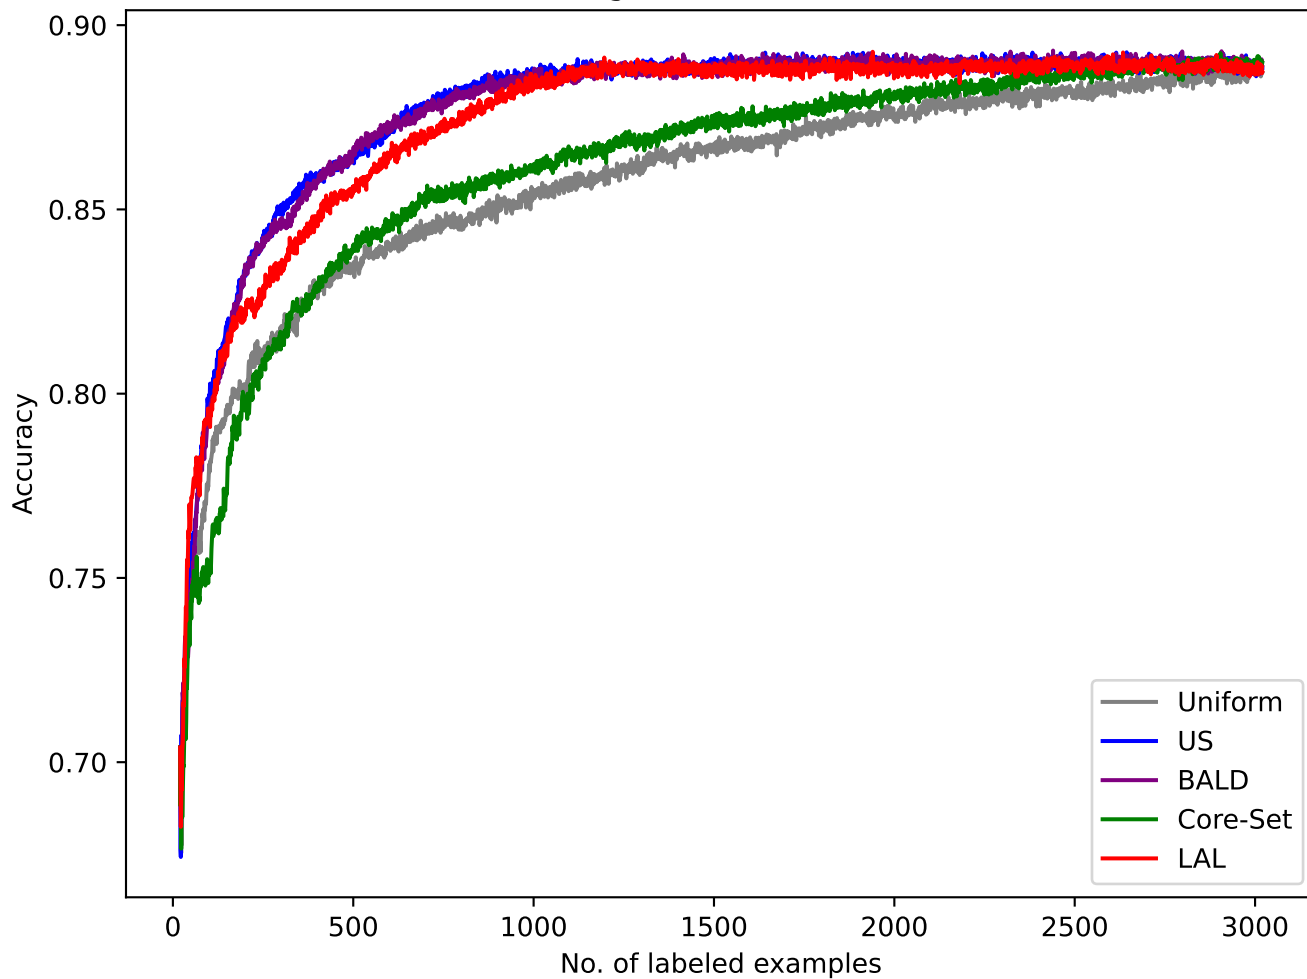

Supplement: supplementary_material [file attachment]

Learning curves with 95% C.I. on Gcloudub

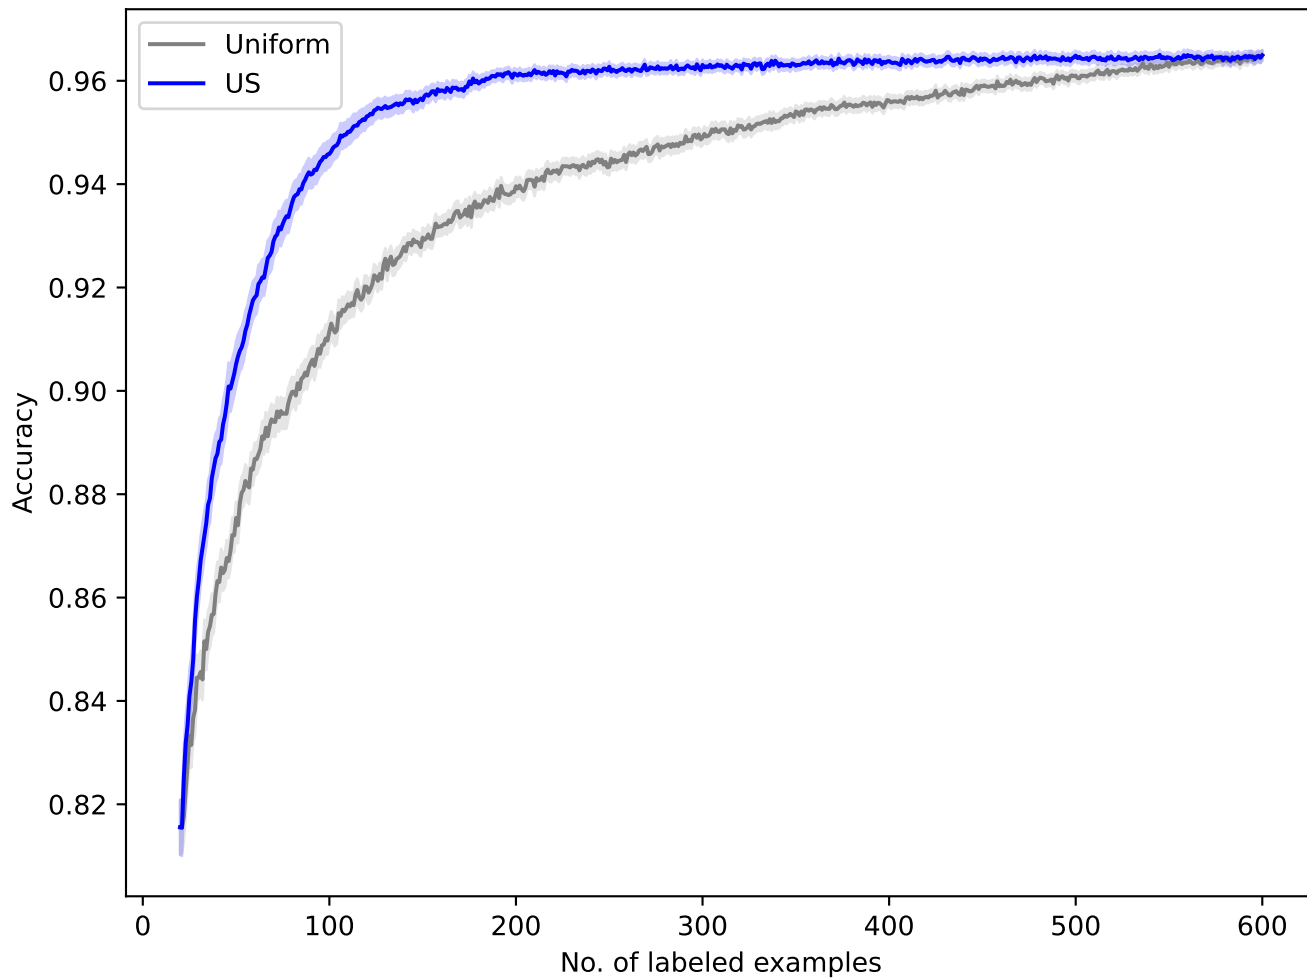

Supplement: supplementary_material [file attachment]

Difference of accuracy on Pol

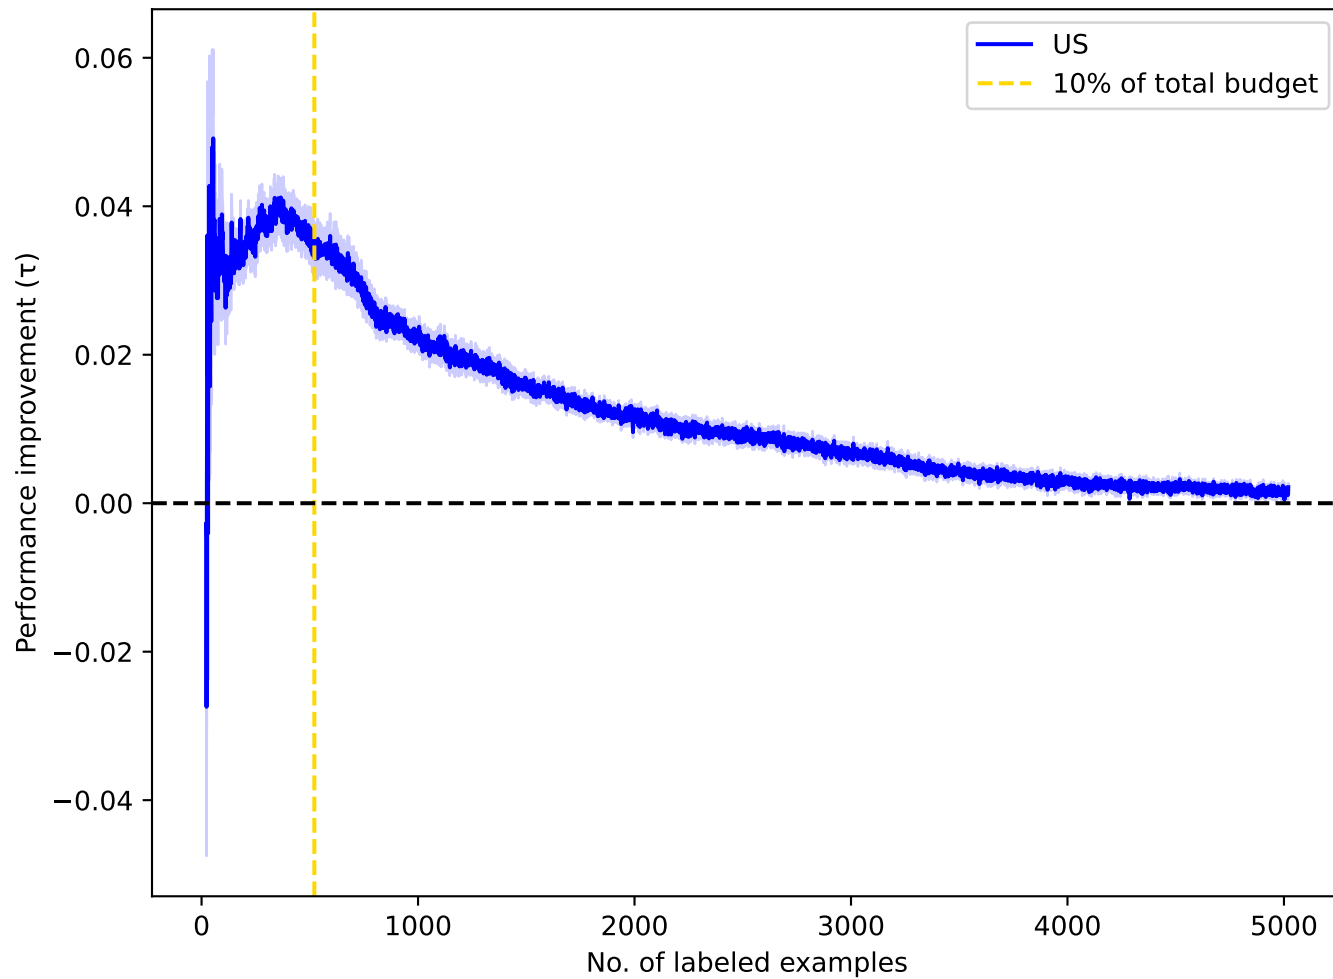

Supplement: supplementary_material [file attachment]

Learning curves with 95% C.I. on Heart

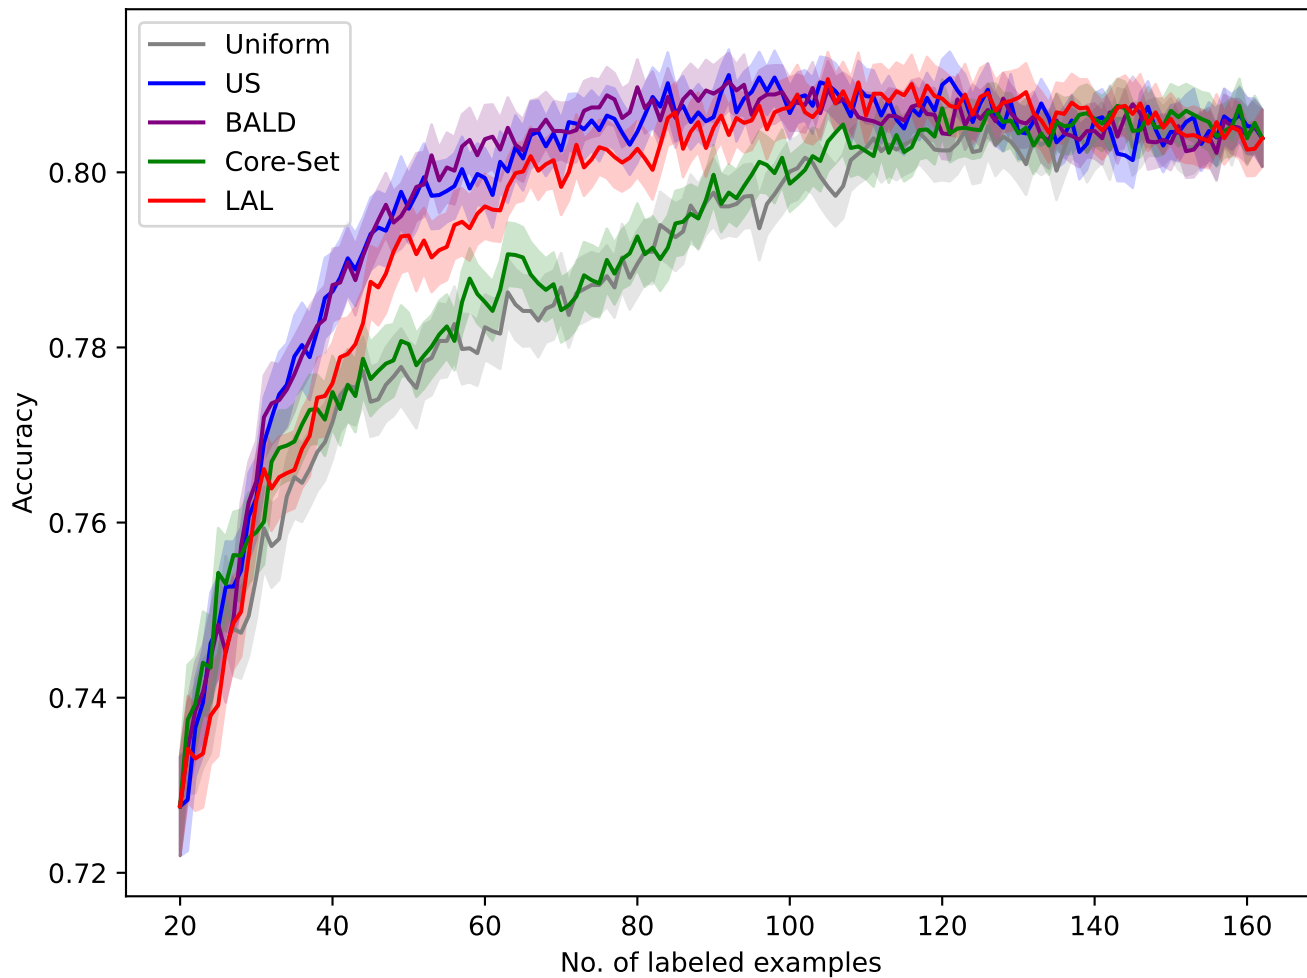

Supplement: supplementary_material [file attachment]

Learning curves on Phishing

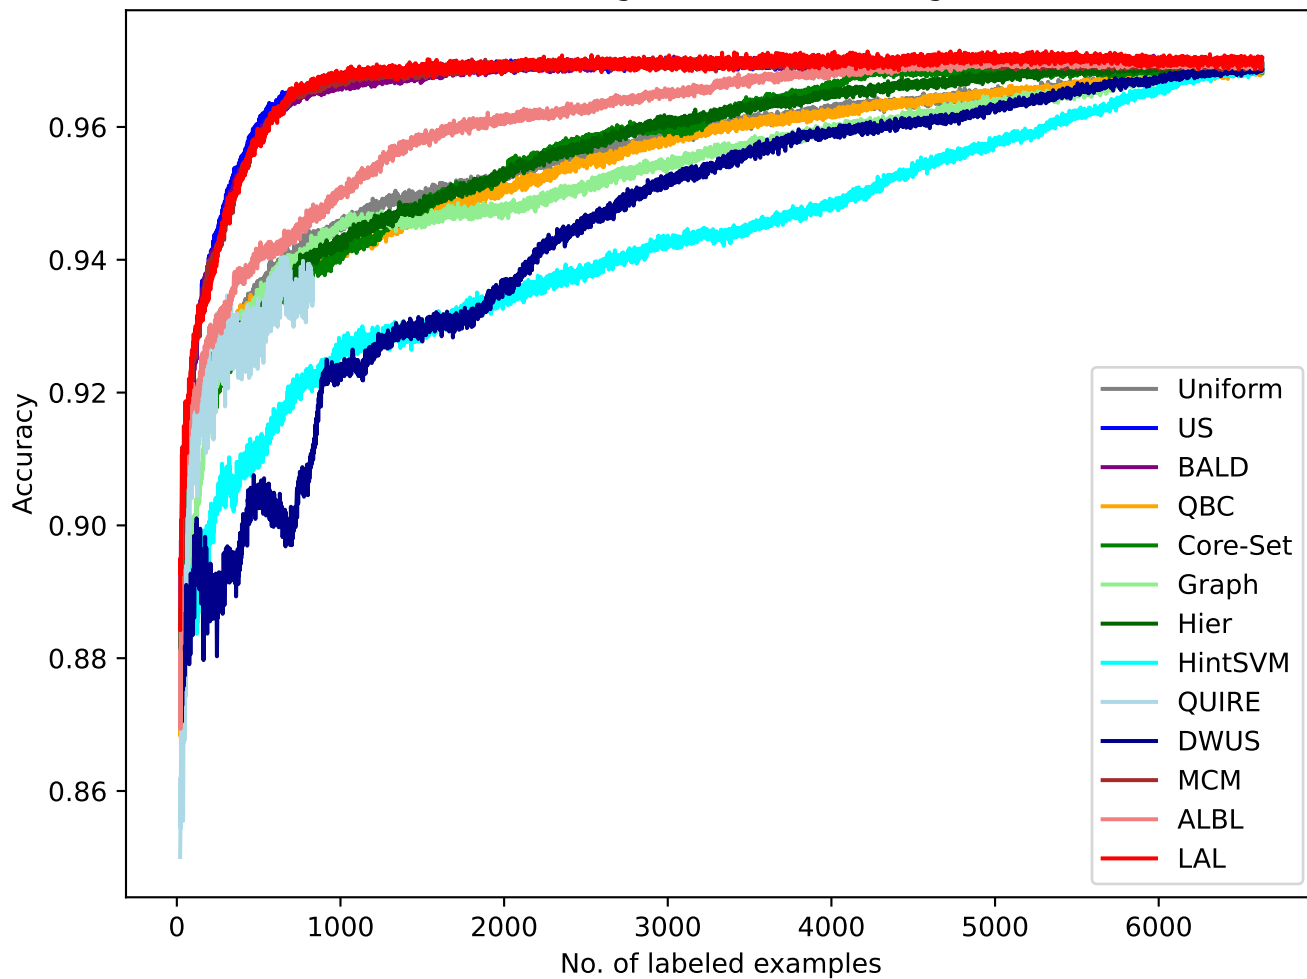

Supplement: supplementary_material [file attachment]

Learning curves on Covertypes

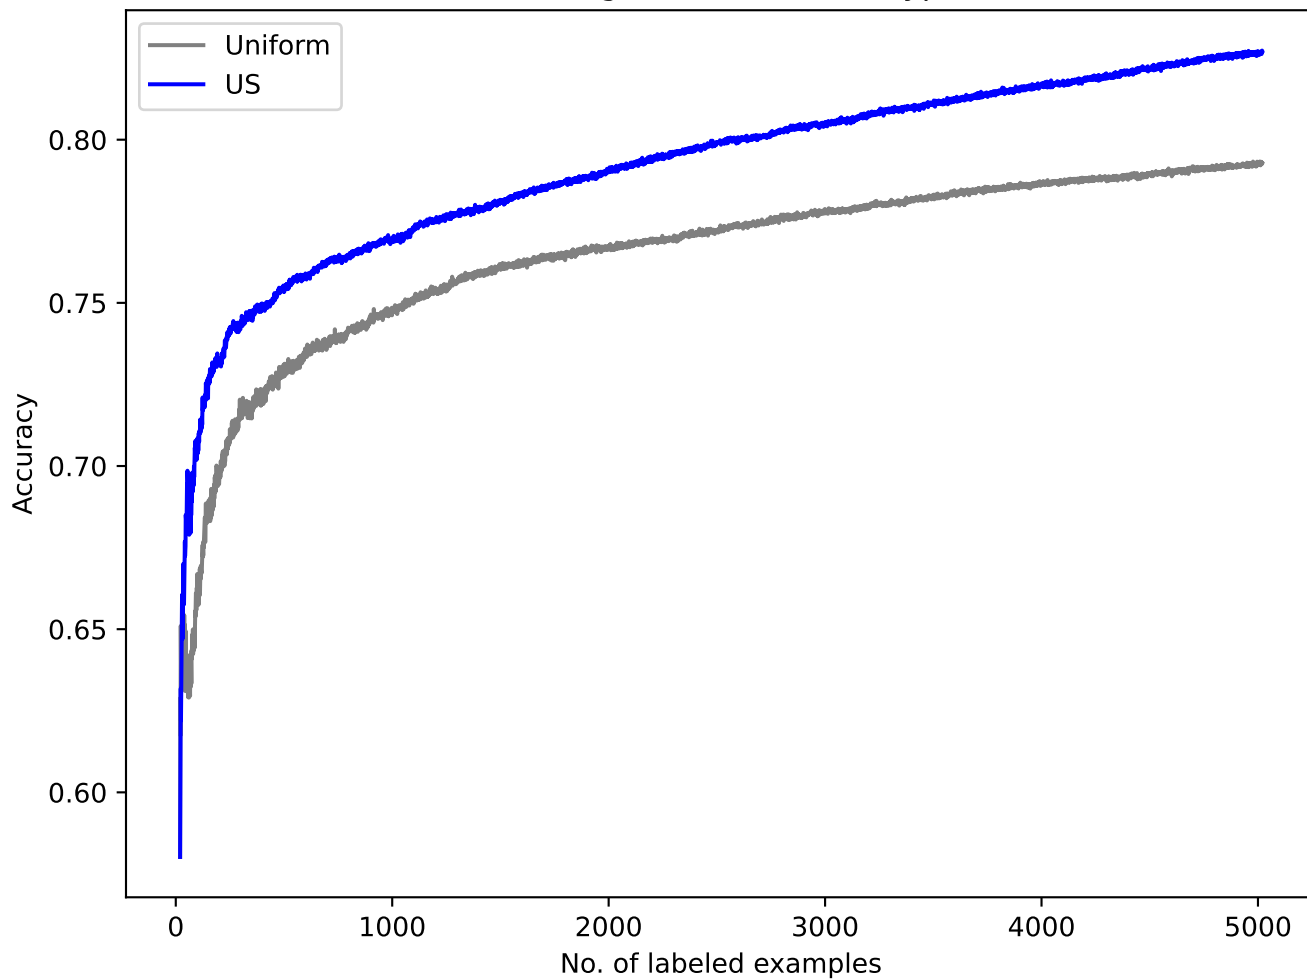

Supplement: supplementary_material [file attachment]

Difference of accuracy on Tic

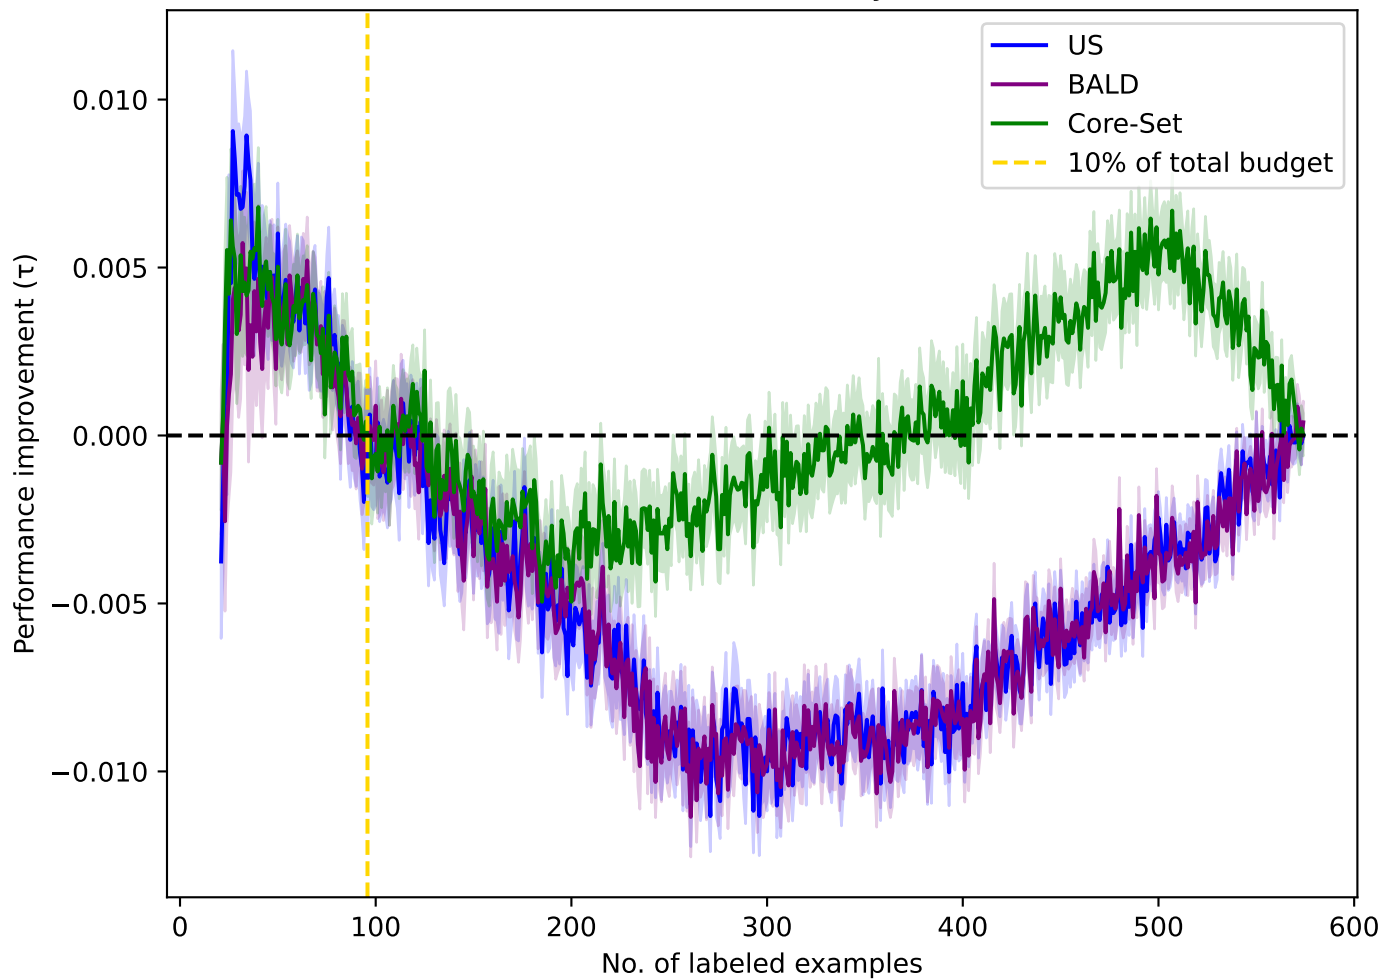

Supplement: supplementary_material [file attachment]

Learning curves on Tic

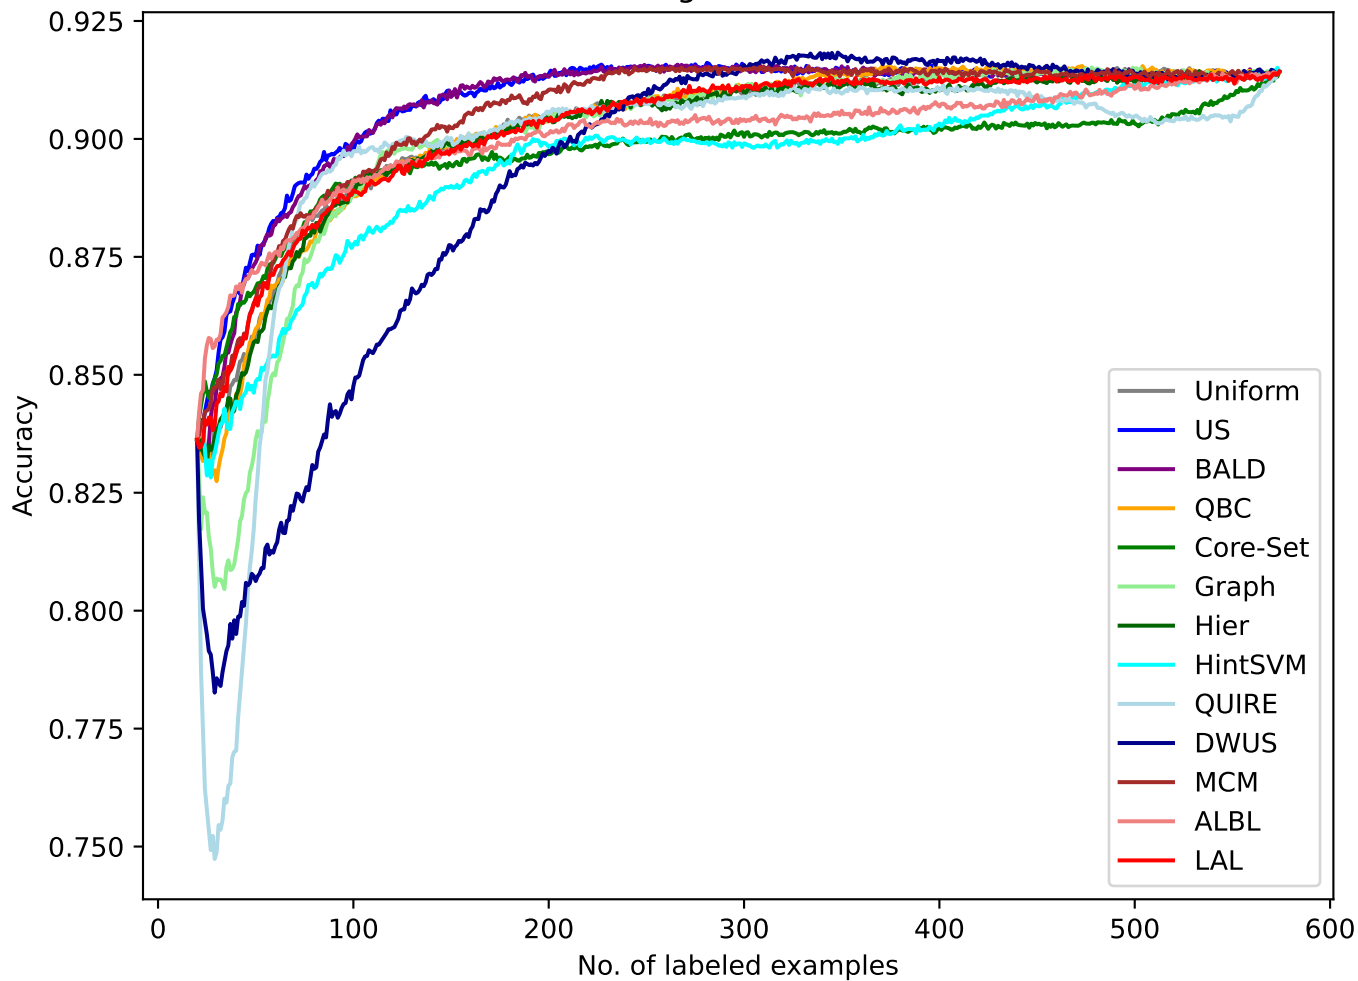

Supplement: supplementary_material [file attachment]

Learning curves with 95% C.I. on Appendicitis

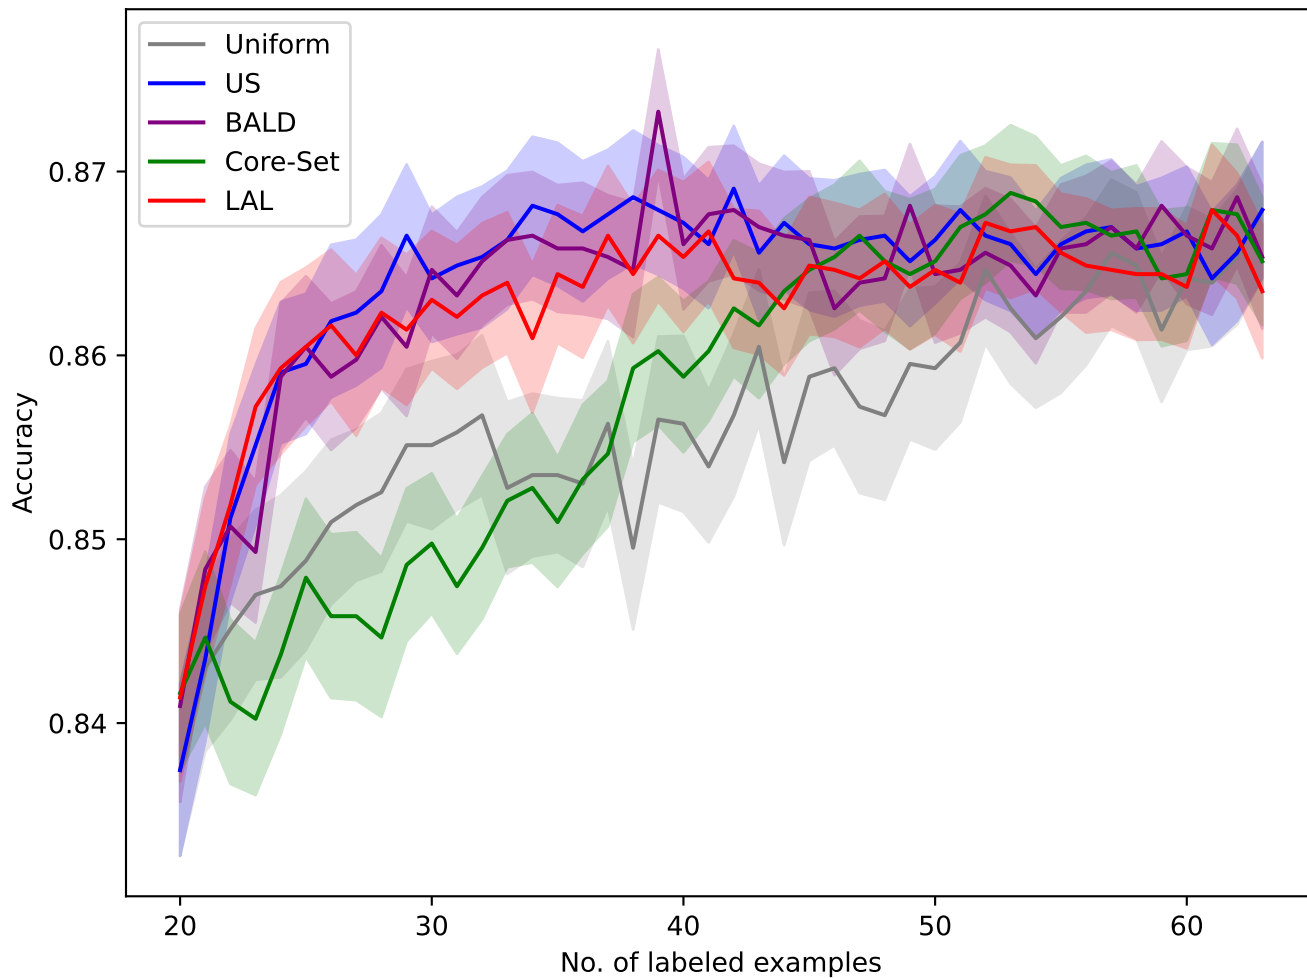

Supplement: supplementary_material [file attachment]

Learning curves with 95% C.I. on Ringnorm

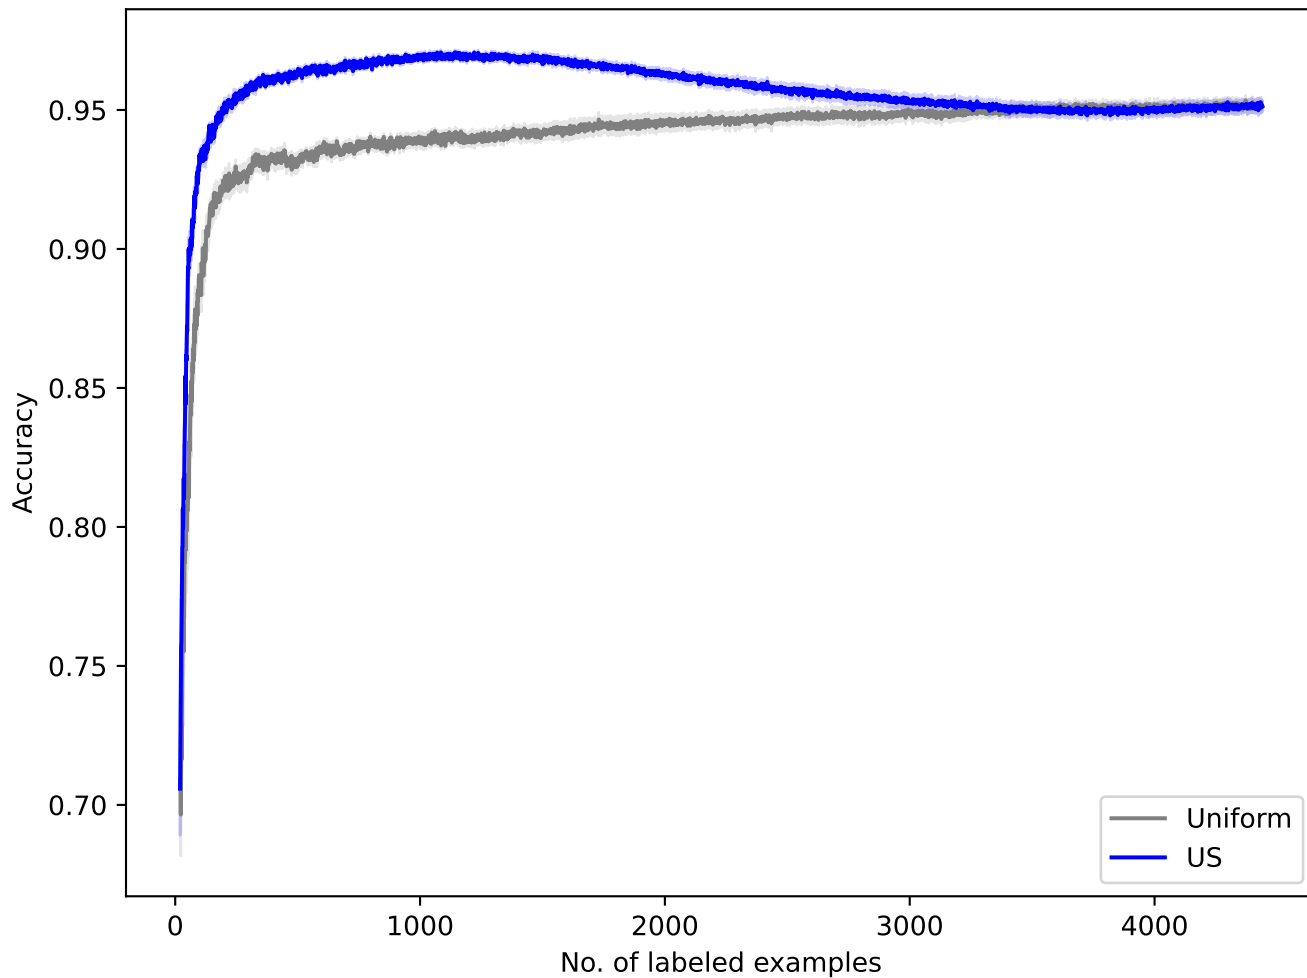

Supplement: supplementary_material [file attachment]

Learning curves with 95% C.I. on Ionosphere

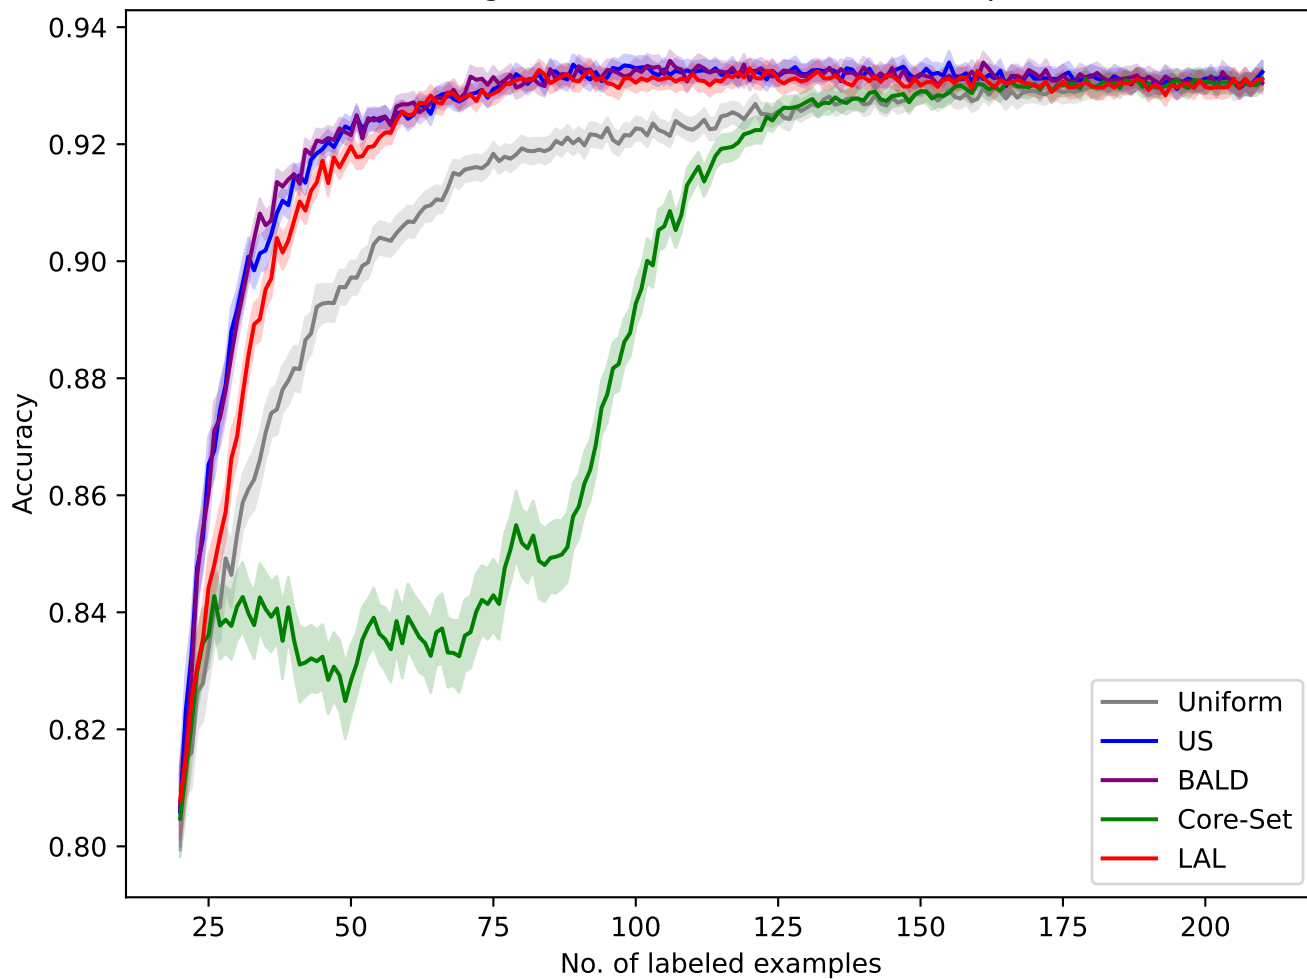

Supplement: supplementary_material [file attachment]

Learning curves on Parkinsons

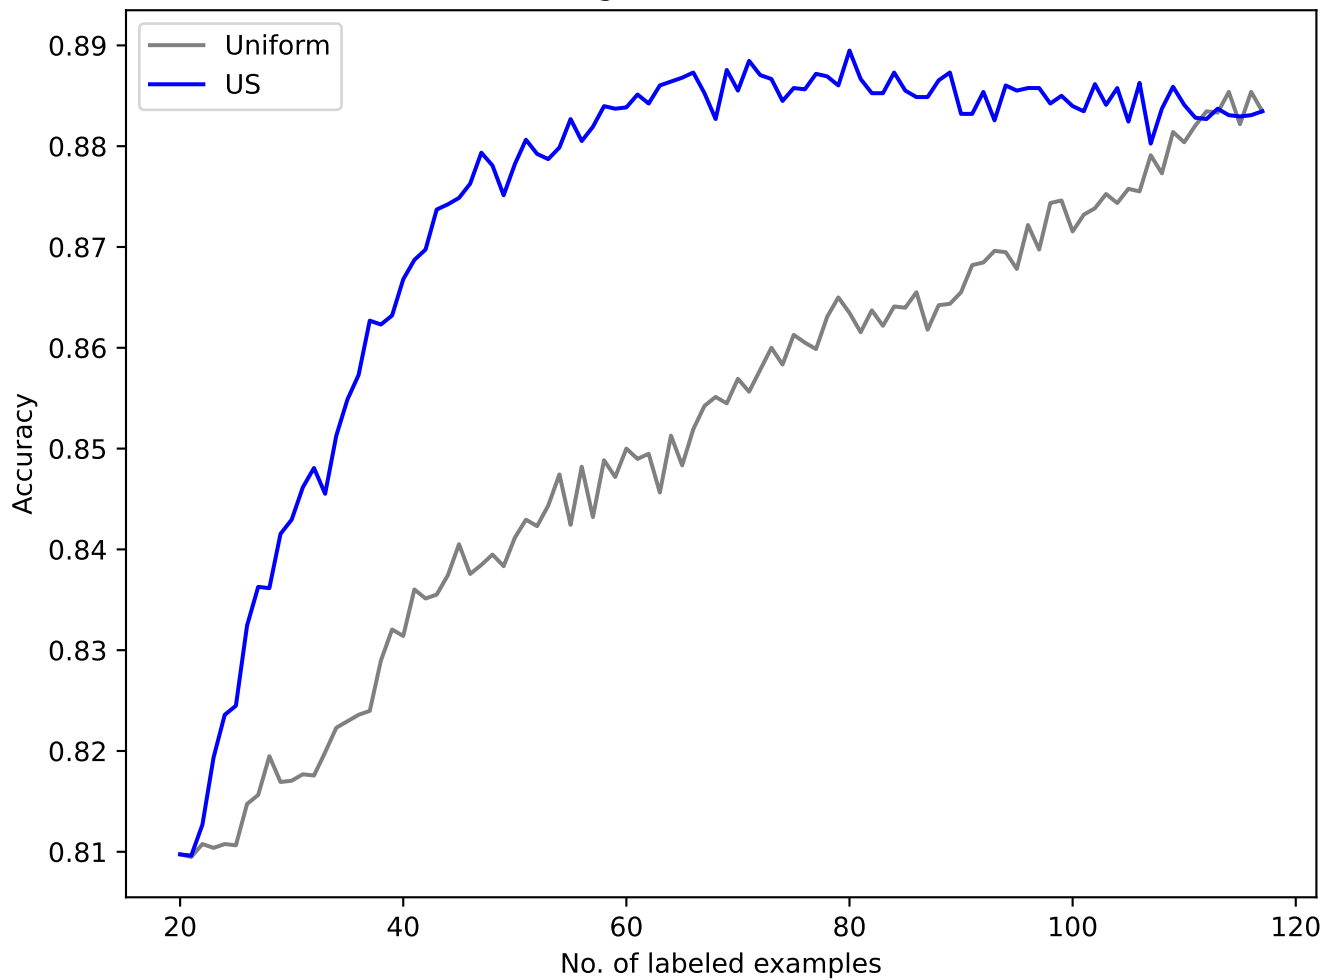

Supplement: supplementary_material [file attachment]

Difference of accuracy on Tic

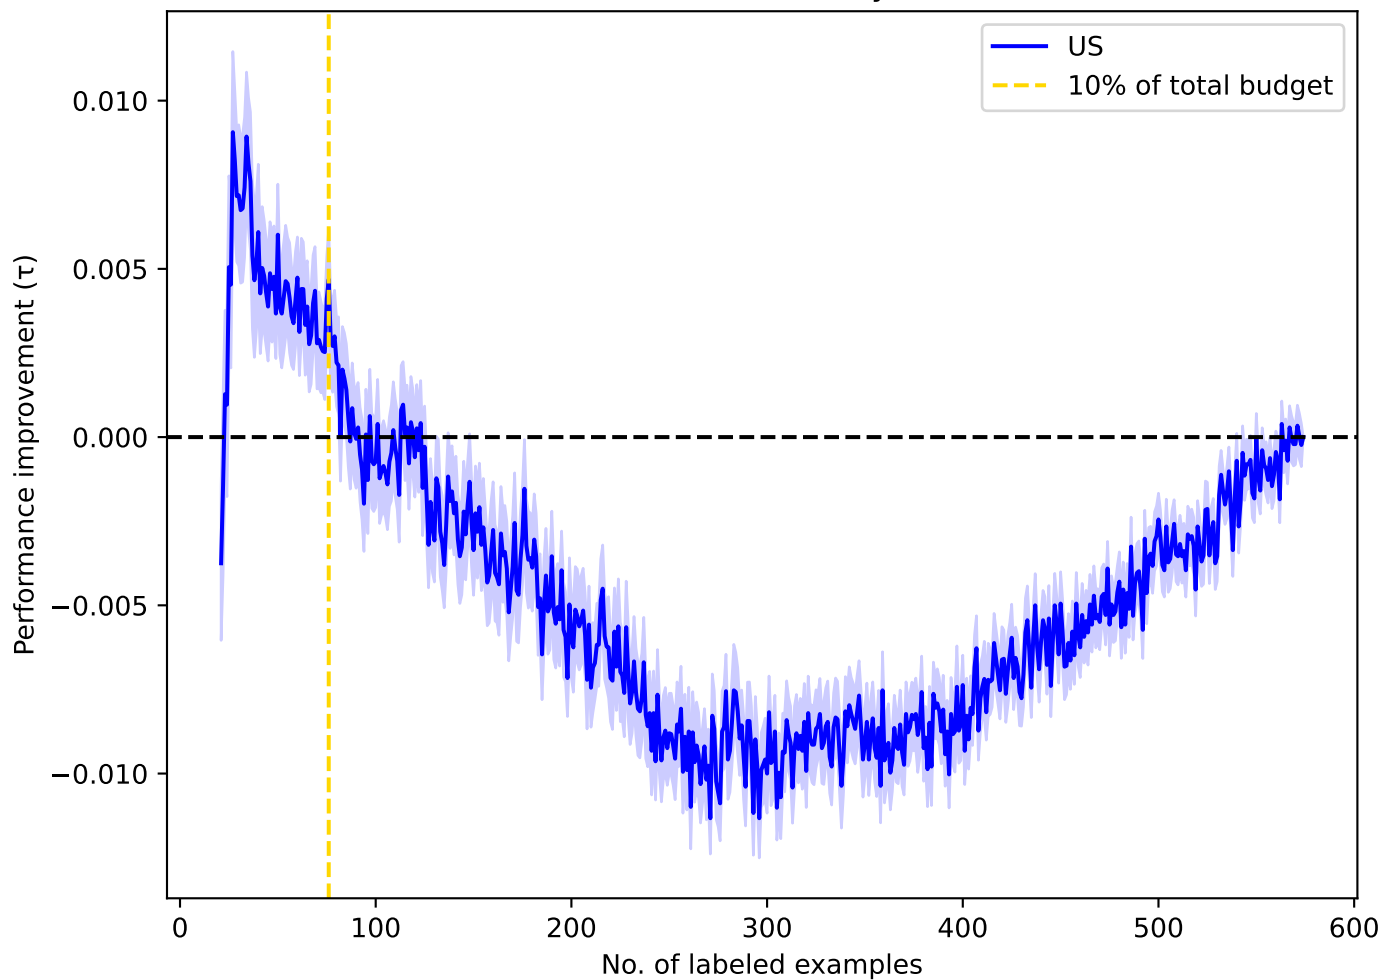

Supplement: supplementary_material [file attachment]

Learning curves on Breast

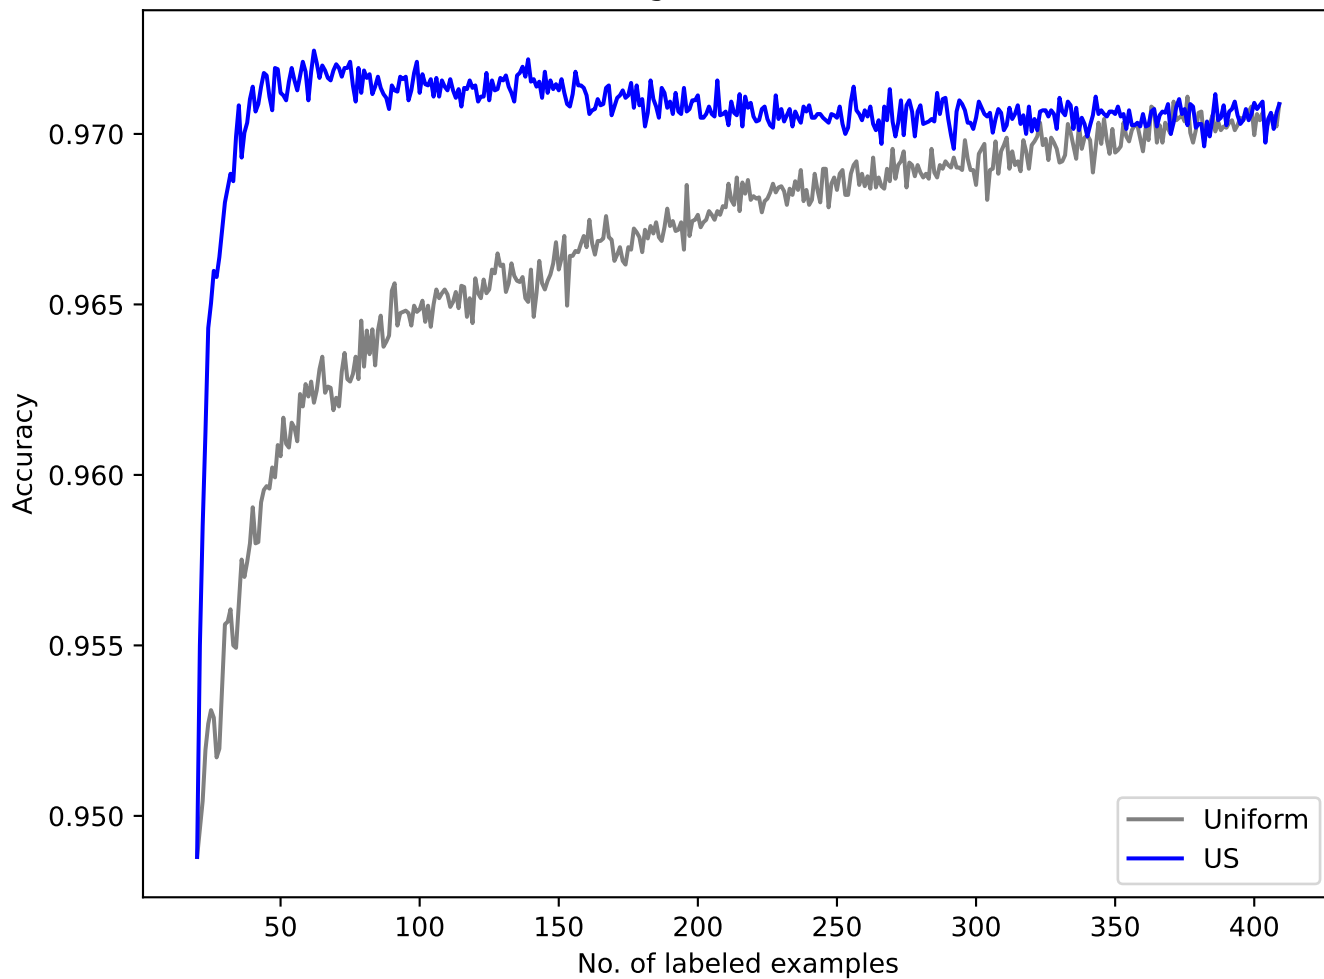

Supplement: supplementary_material [file attachment]

Learning curves with 95% C.I. on Australian

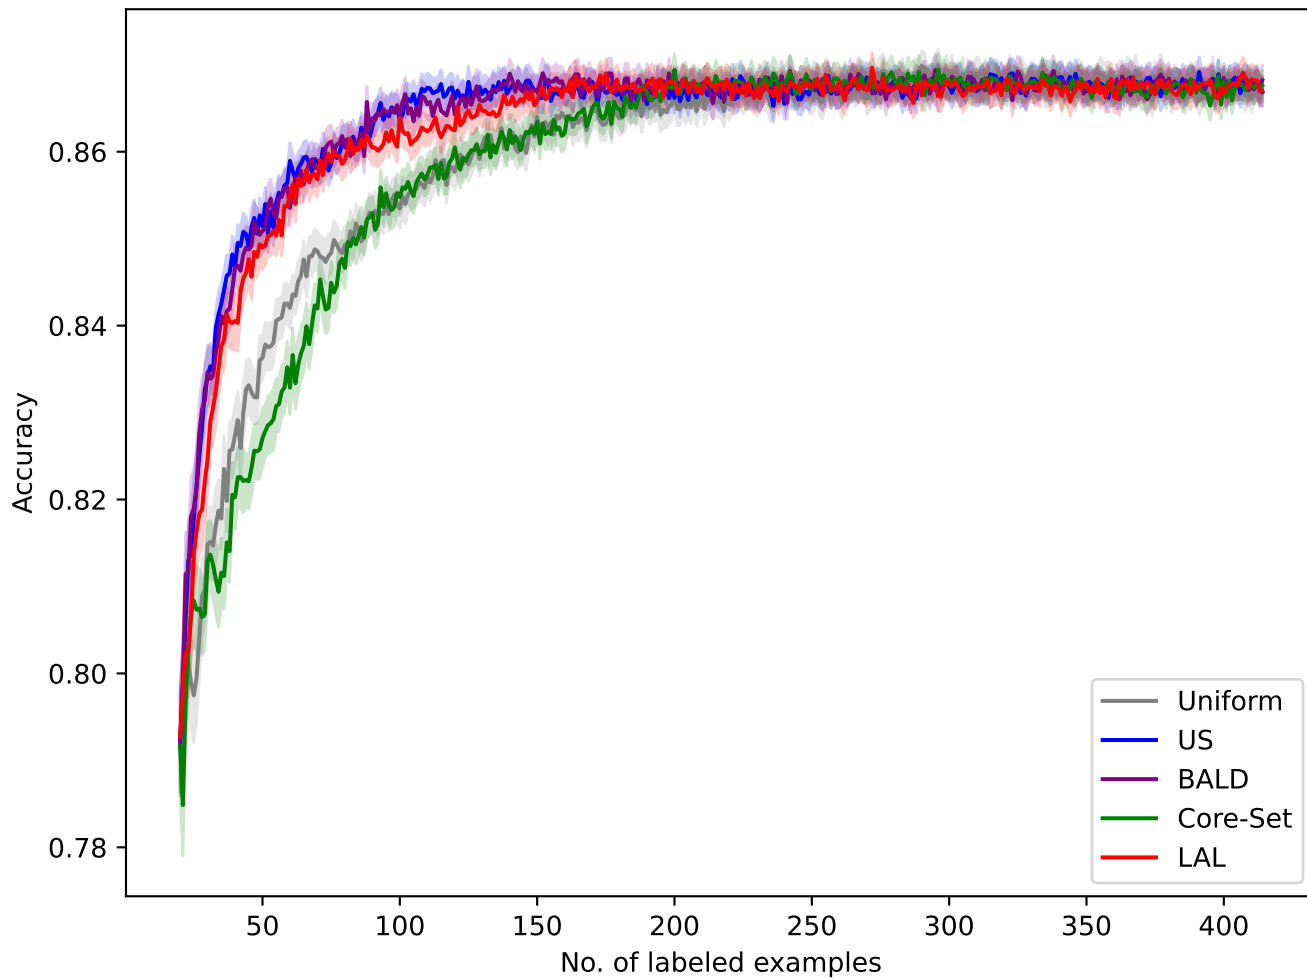

Supplement: supplementary_material [file attachment]

Learning curves on Pol

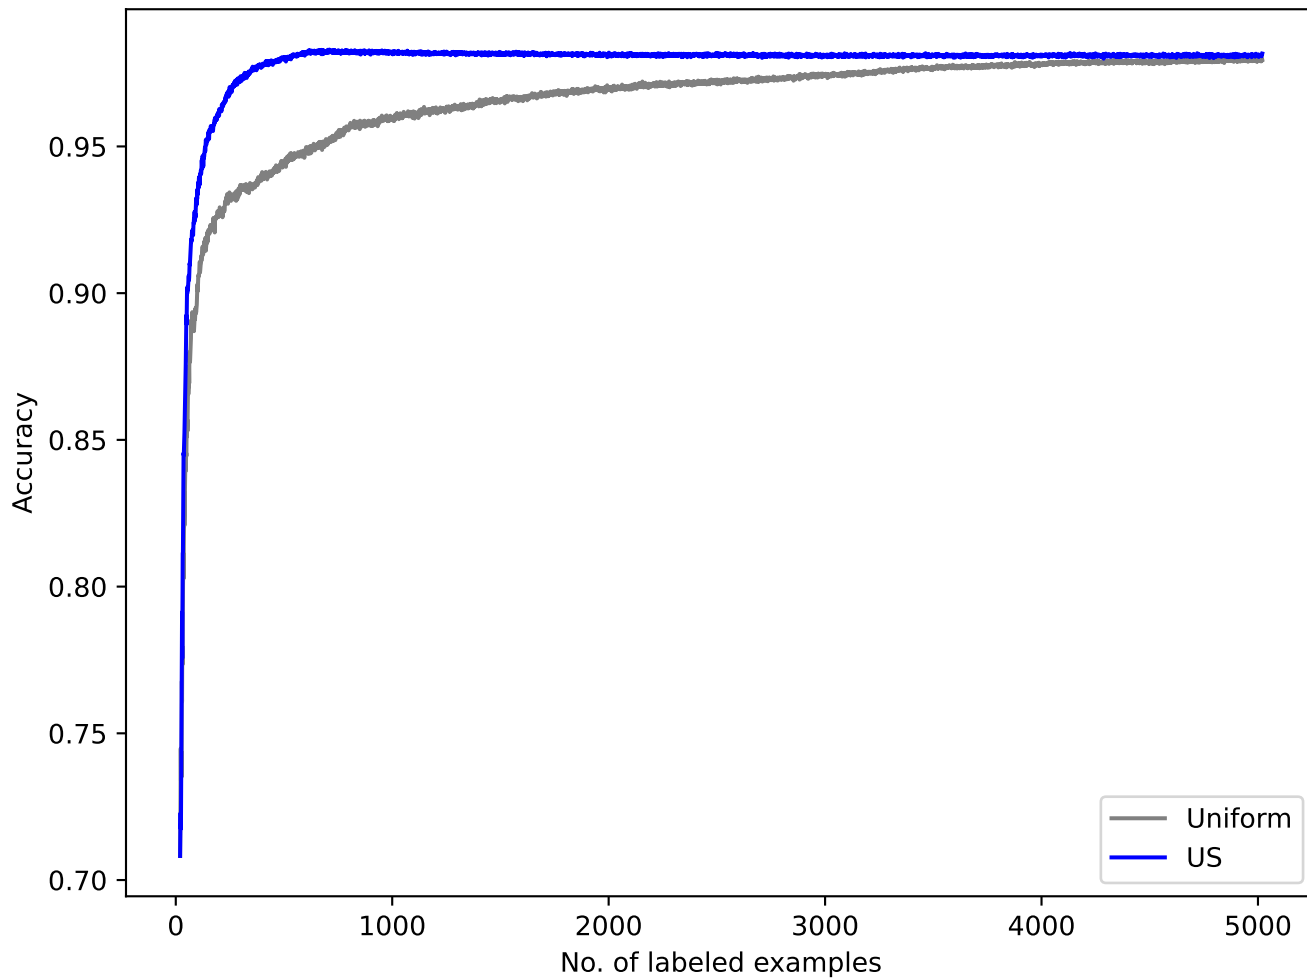

Supplement: supplementary_material [file attachment]

Learning curves on German

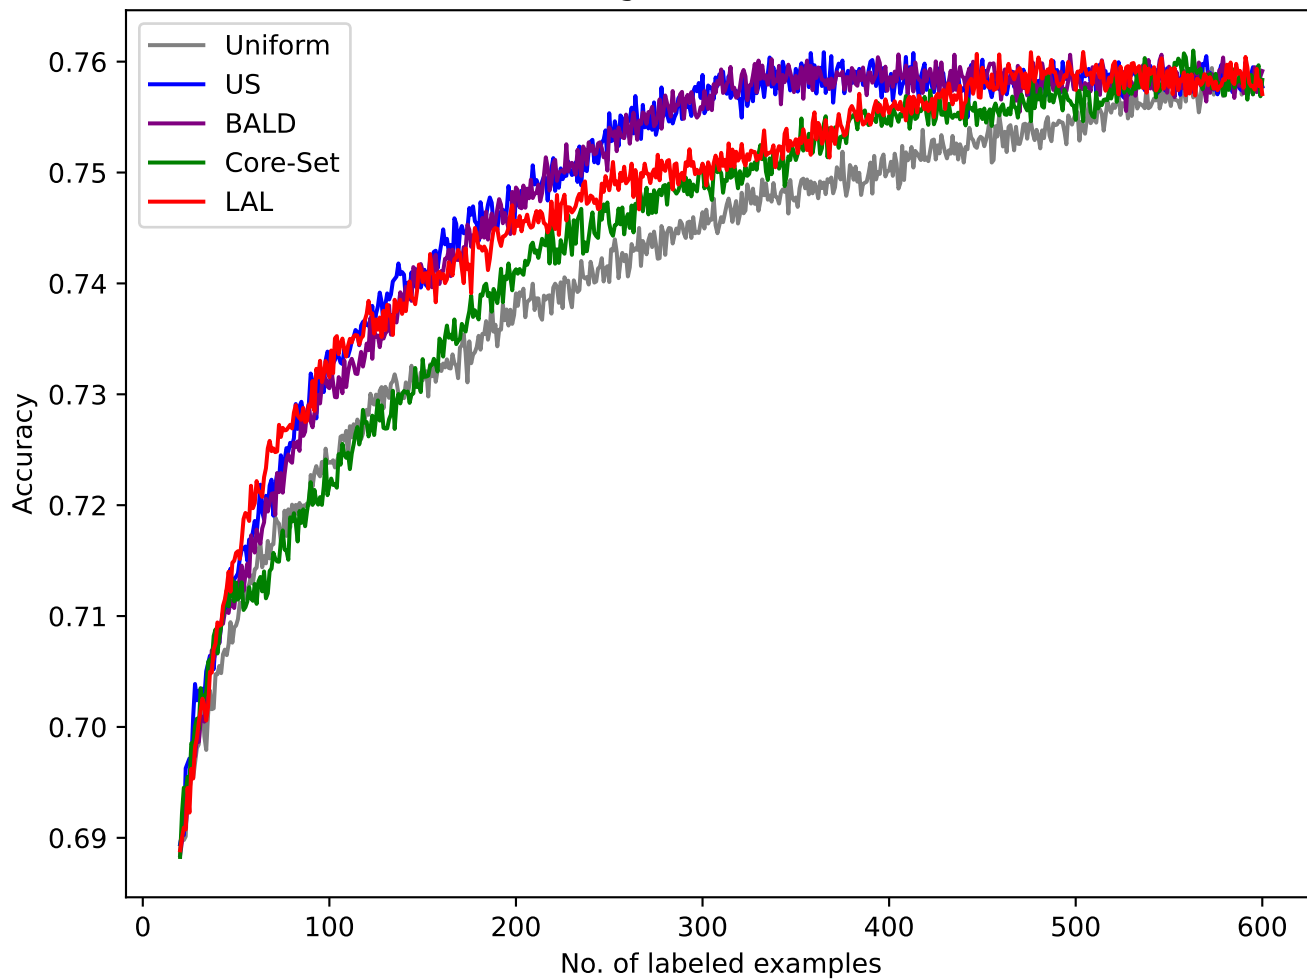

Supplement: supplementary_material [file attachment]

Learning curves on Twonorm

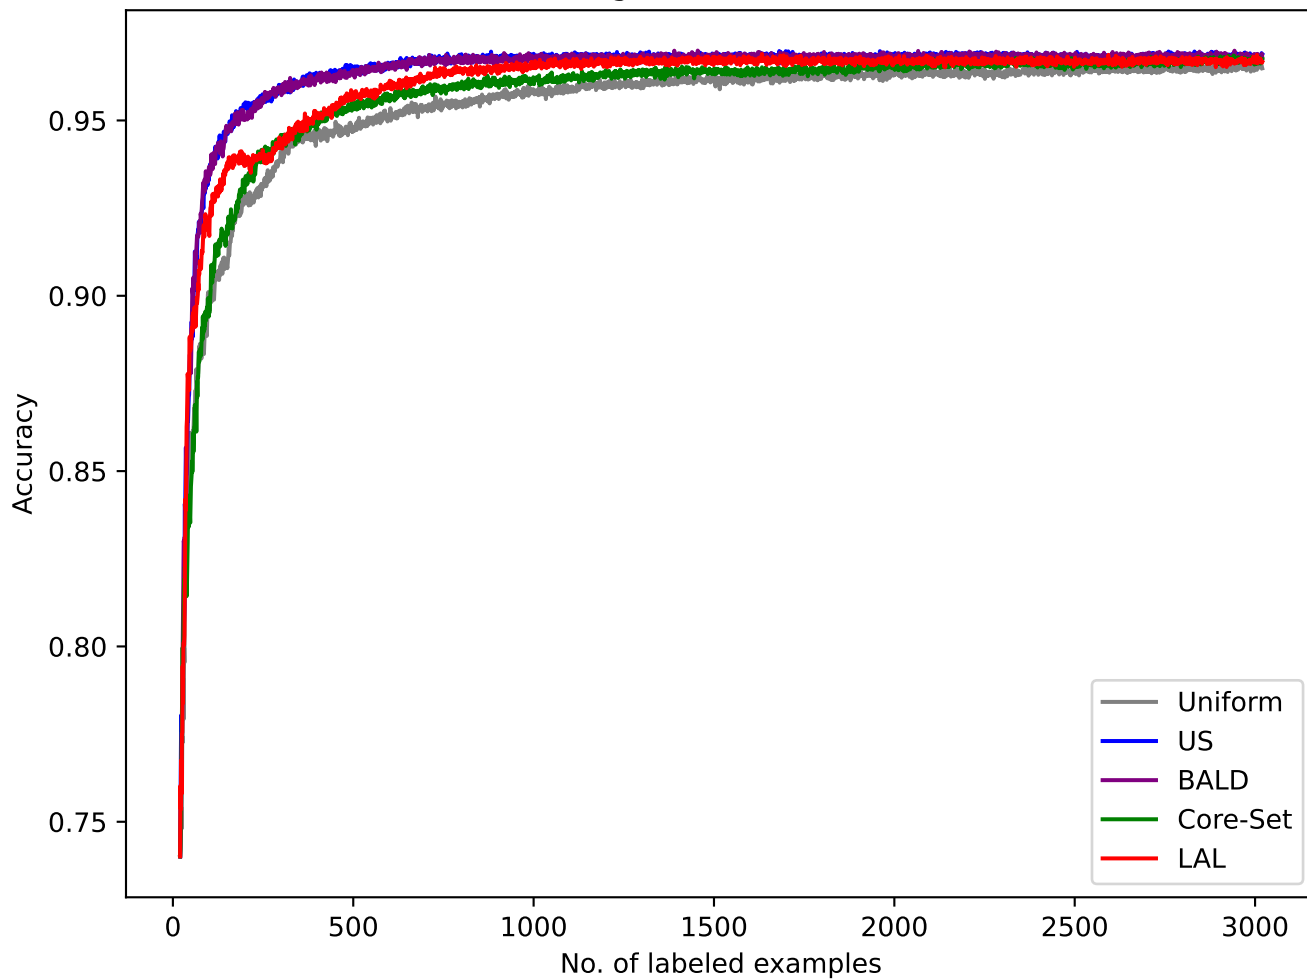

Supplement: supplementary_material [file attachment]

Learning curves with 95% C.I. on Breast

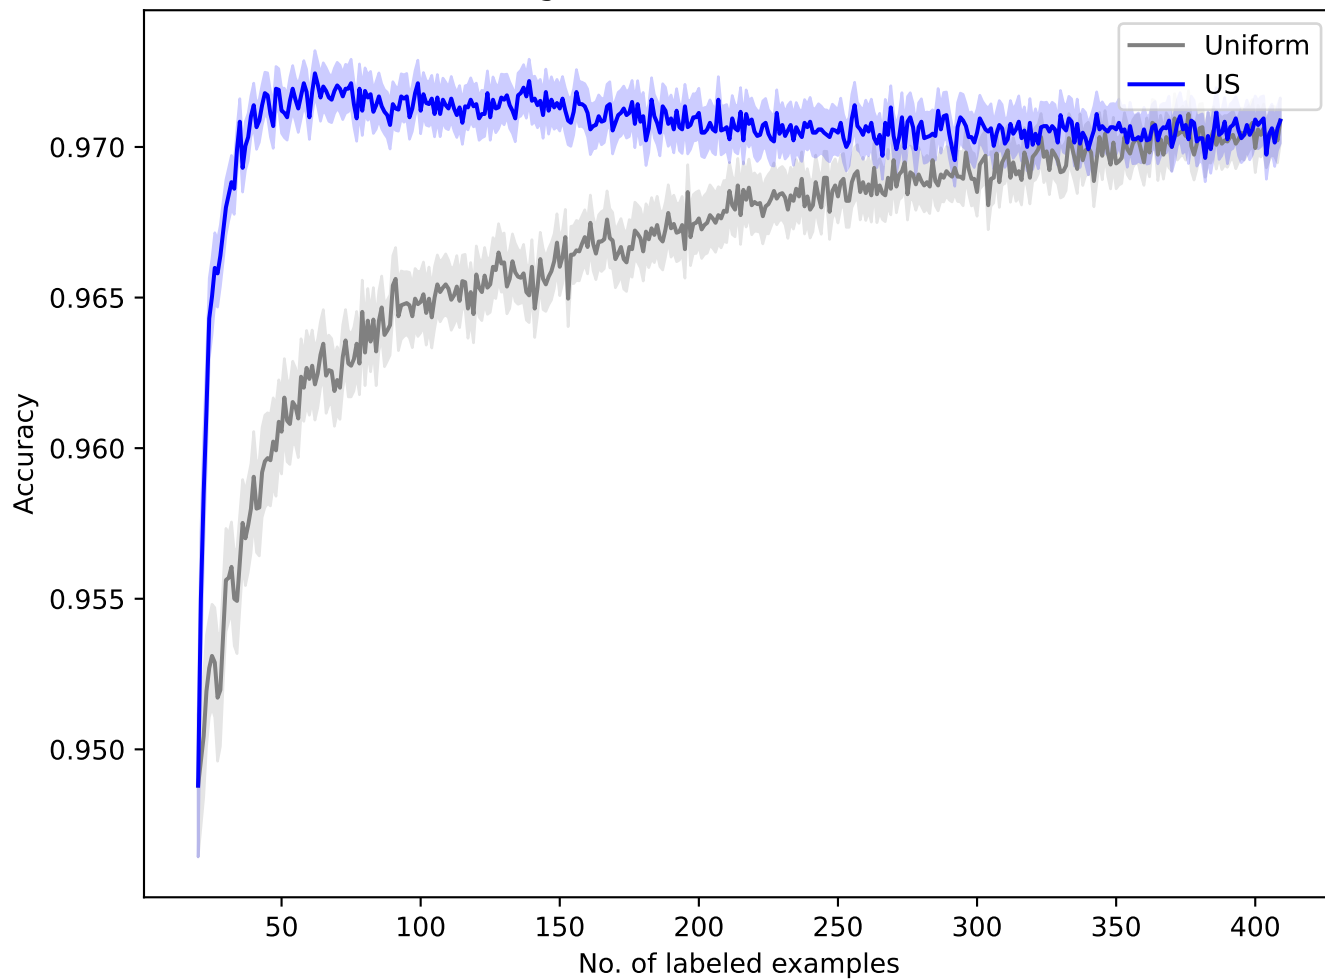

Supplement: supplementary_material [file attachment]

Learning curves on Gcloudub

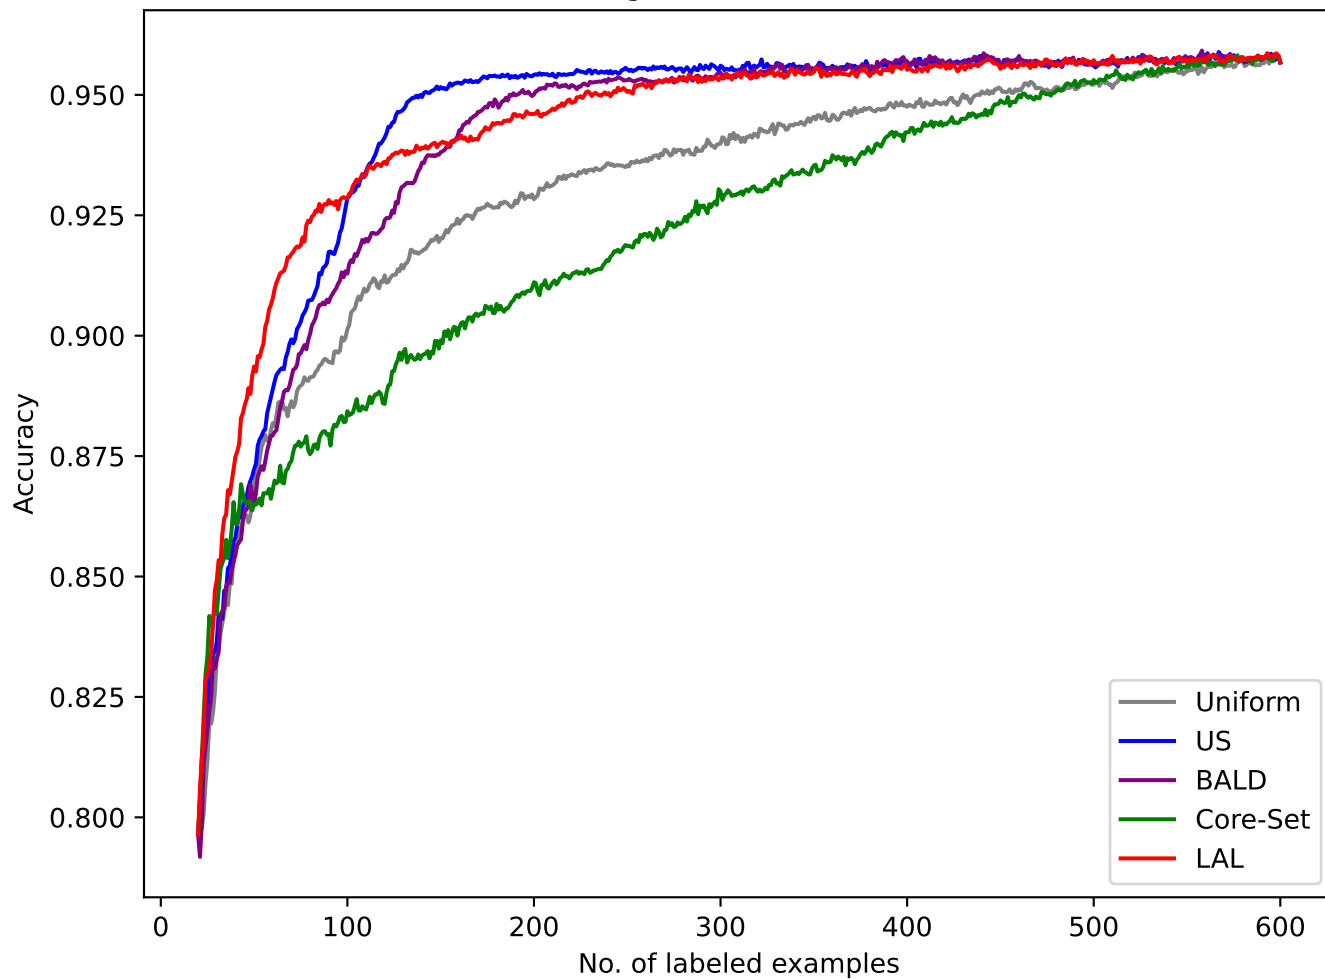

Supplement: supplementary_material [file attachment]

Learning curves on Phishing

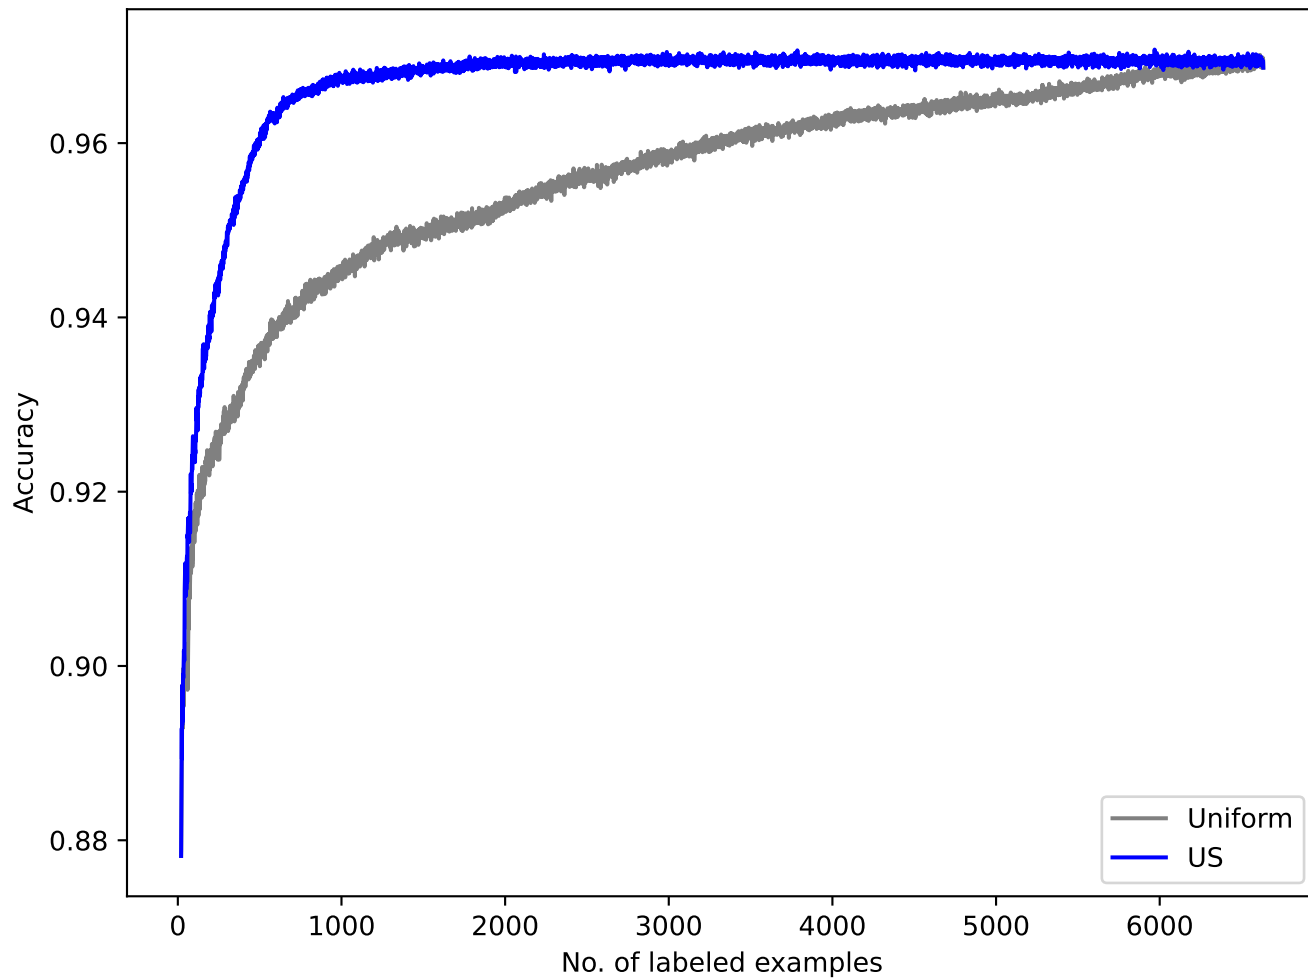

Supplement: supplementary_material [file attachment]
