# Supplementary material (part 4 of 4)
Source: ML conference proceedings conference paper supplement (https://openreview.net/forum?id=855yo1Ubt2)

Learning curves on Spambase

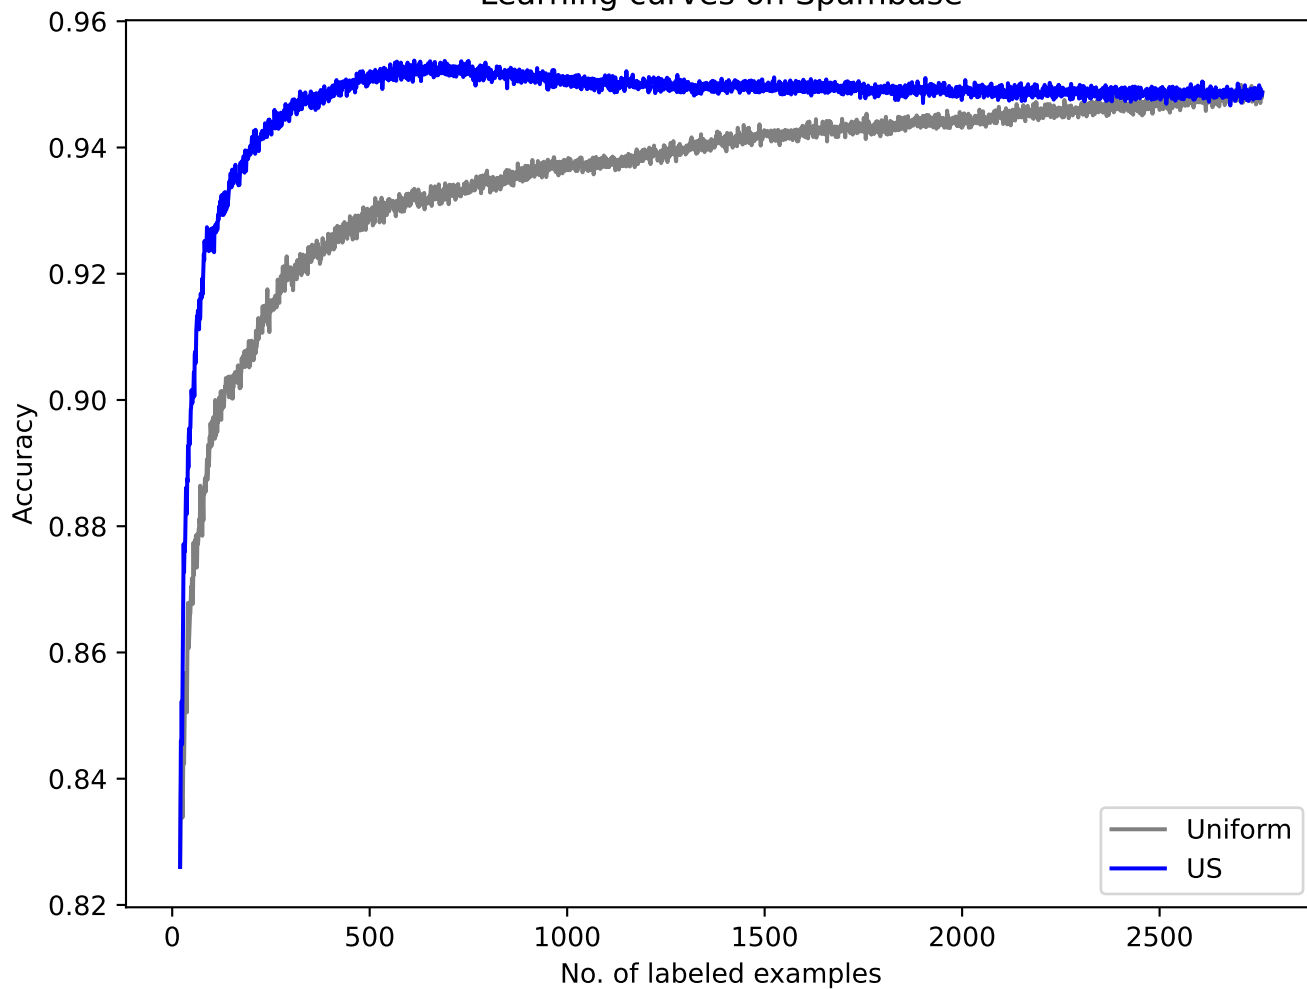

Supplement: supplementary_material [file attachment]

Difference of accuracy on Phoneme

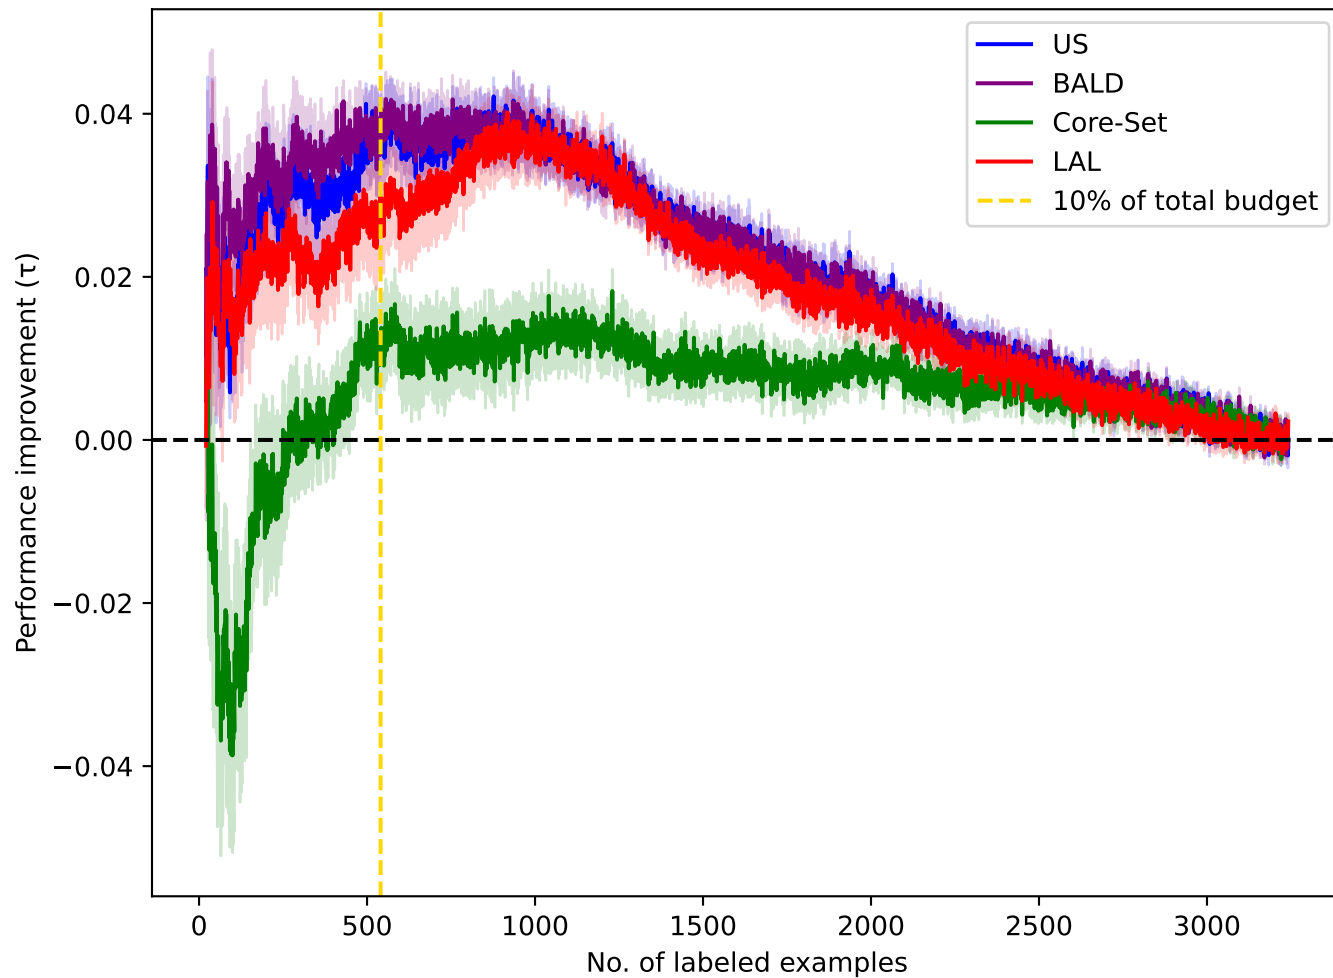

Supplement: supplementary_material [file attachment]

Learning curves on Clean1

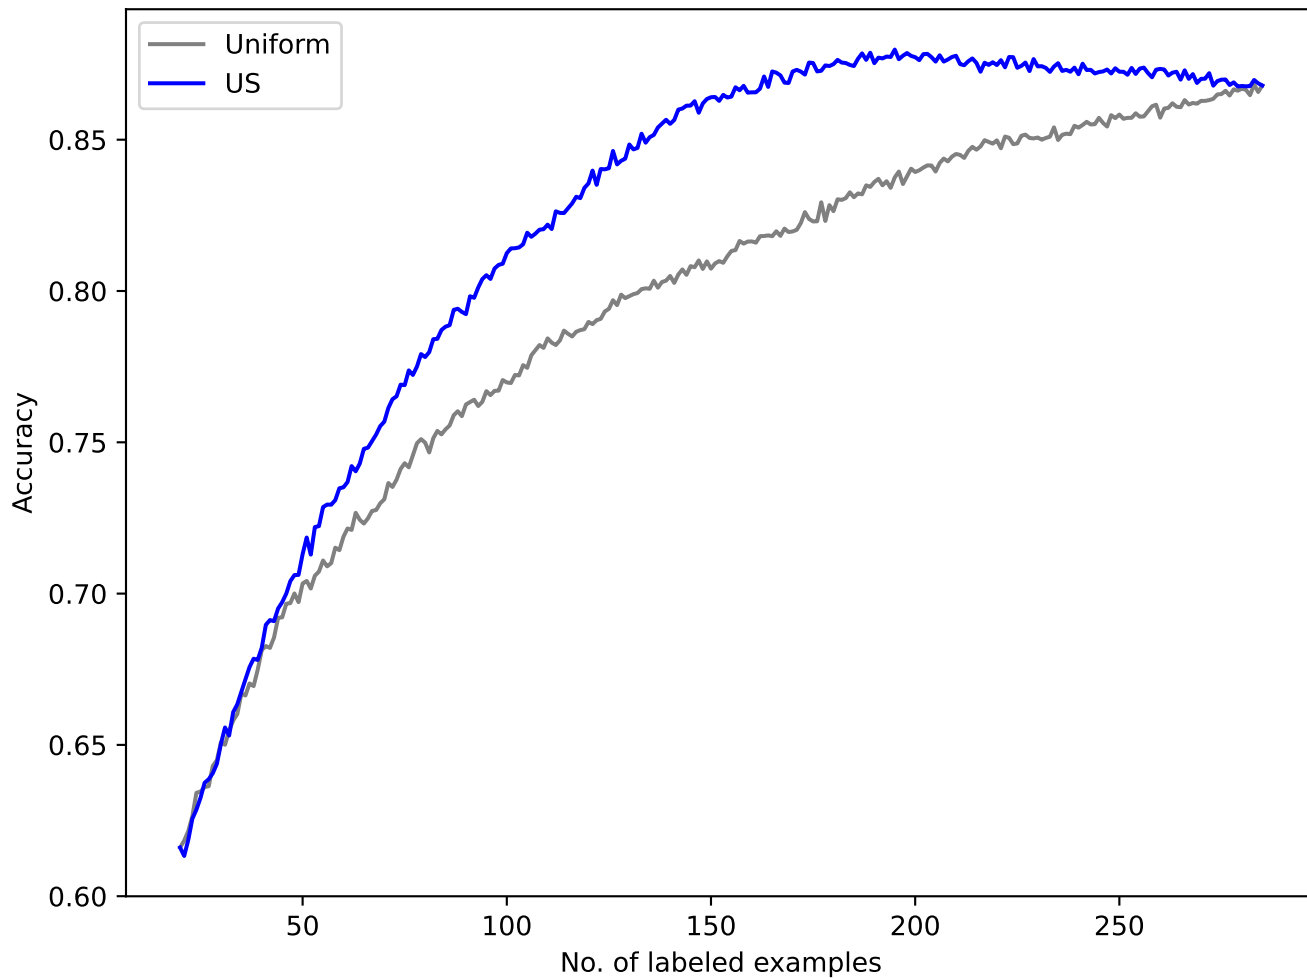

Supplement: supplementary_material [file attachment]

Learning curves on Australian

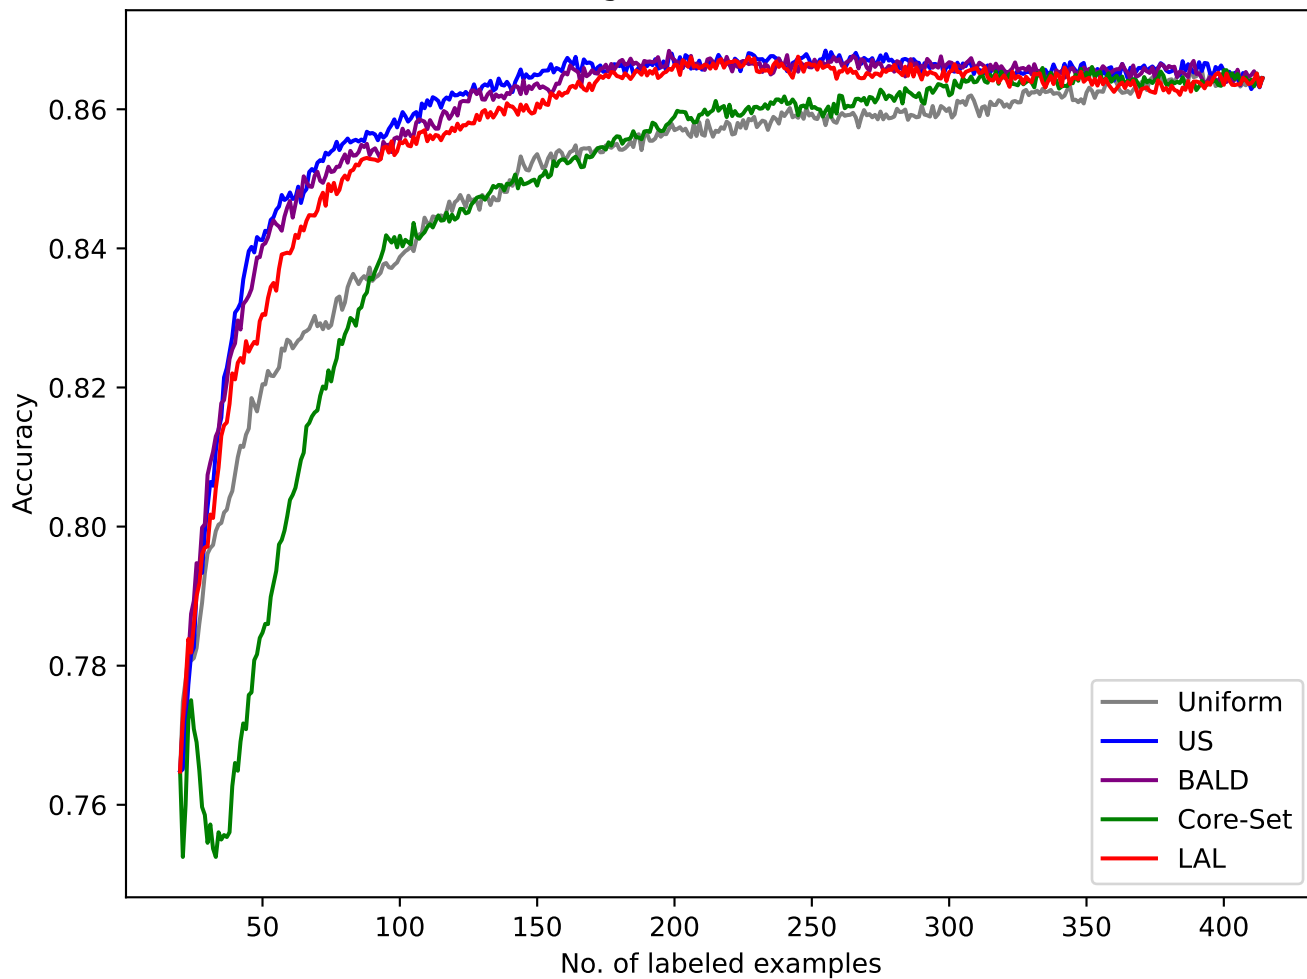

Supplement: supplementary_material [file attachment]

Learning curves on Parkinsons

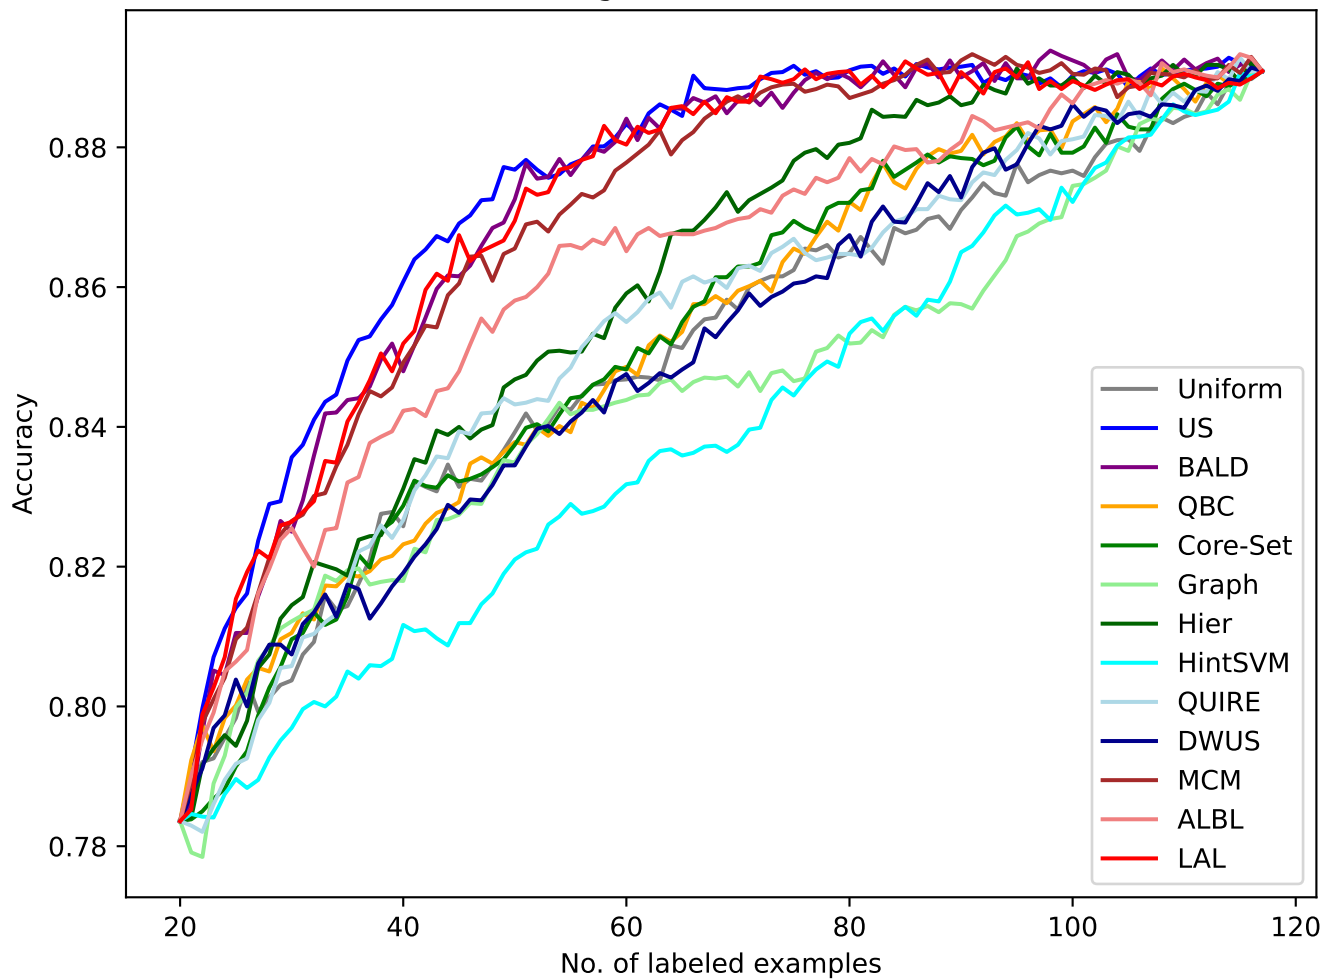

Supplement: supplementary_material [file attachment]

Difference of accuracy on Breast

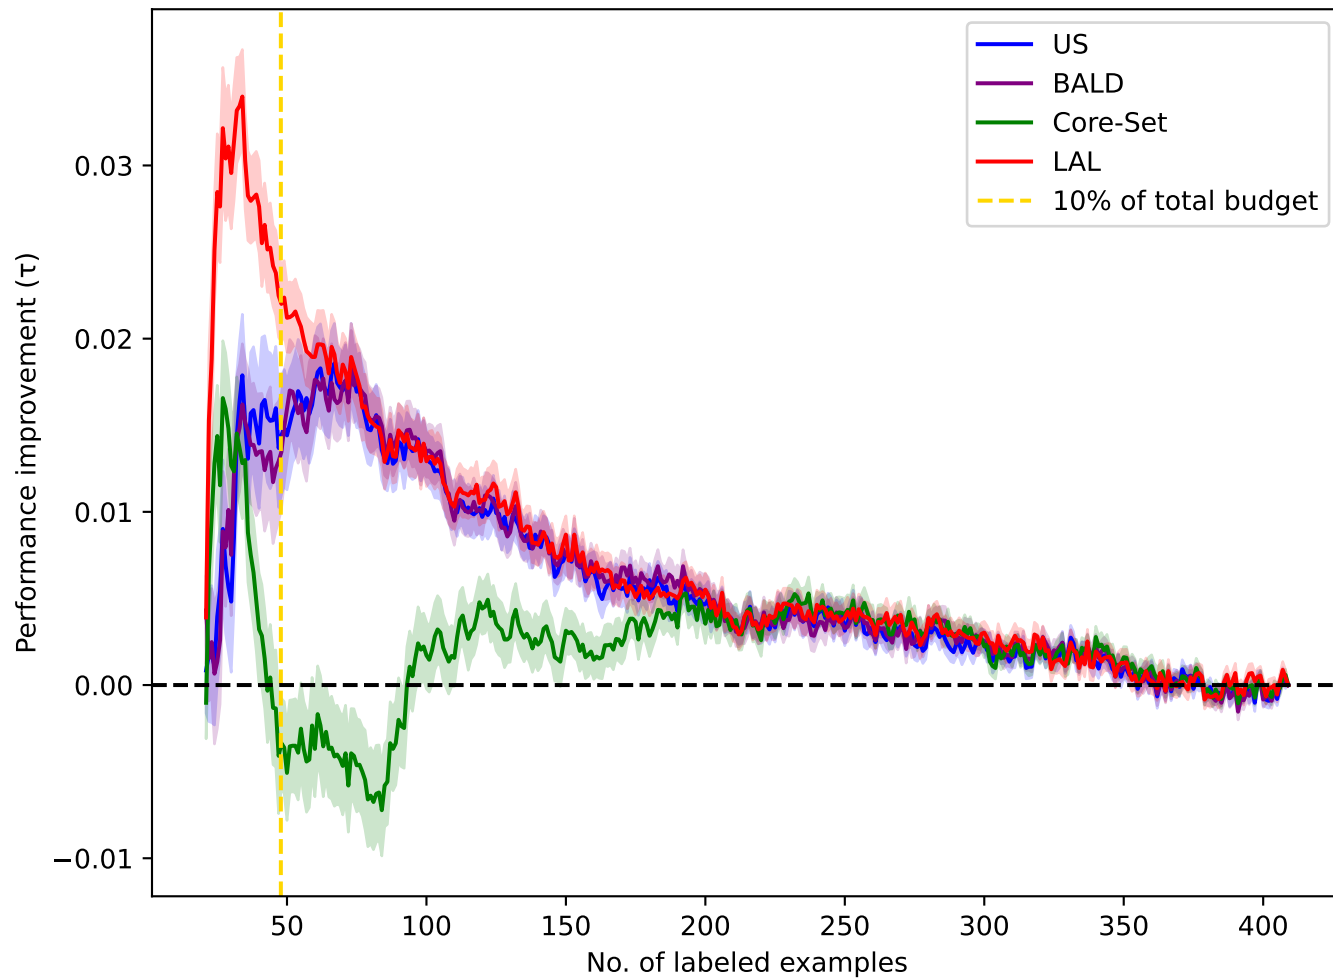

Supplement: supplementary_material [file attachment]

Difference of accuracy on Diabetes

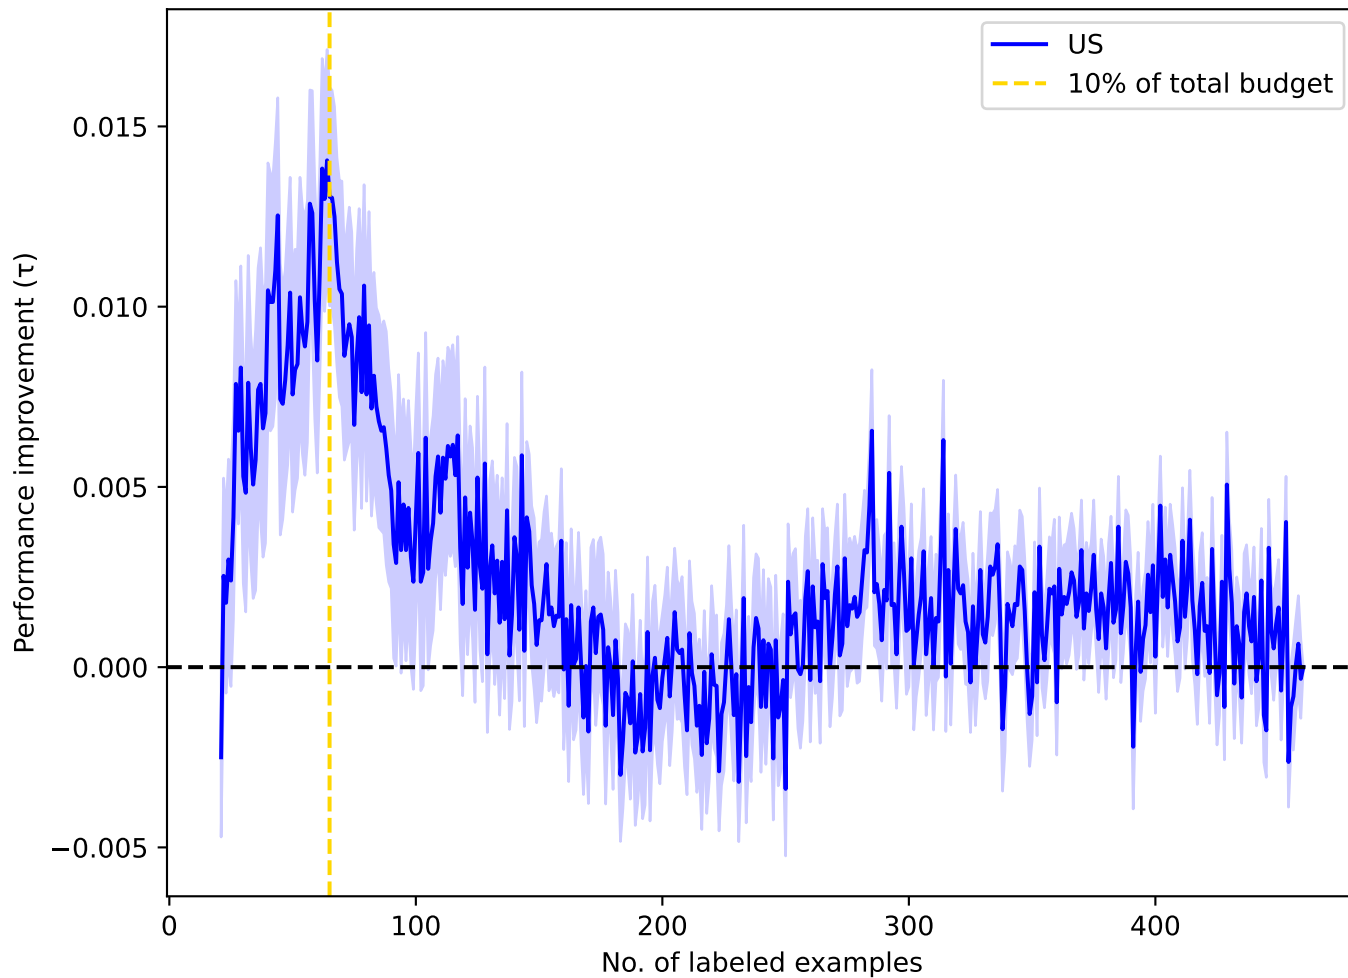

Supplement: supplementary_material [file attachment]

Learning curves on Mammographic

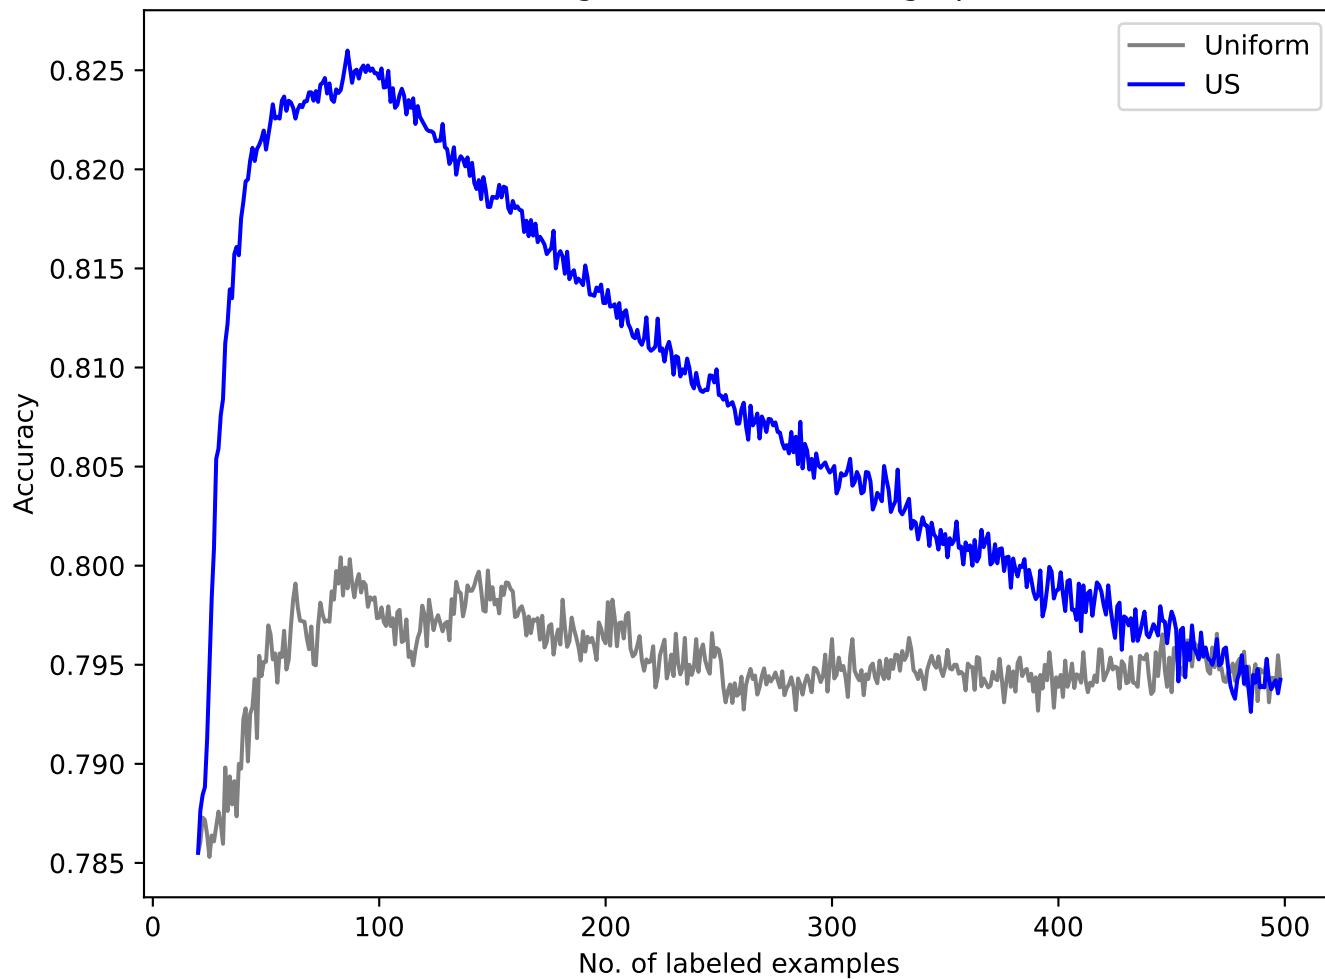

Supplement: supplementary_material [file attachment]

## Learning curves on Ionosphere

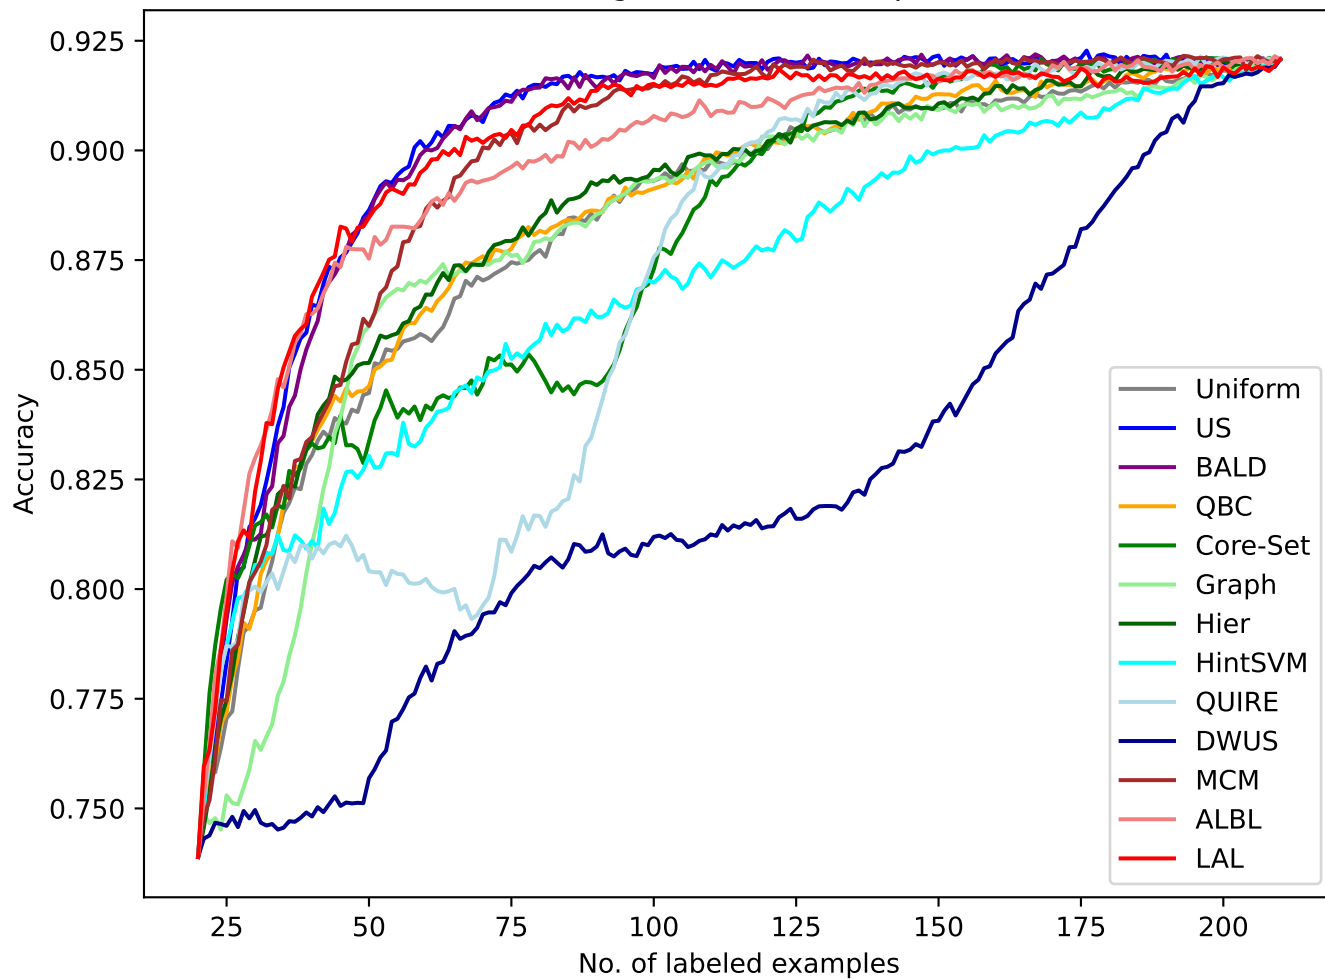

Supplement: supplementary_material [file attachment]

Difference of accuracy on Gcloudb

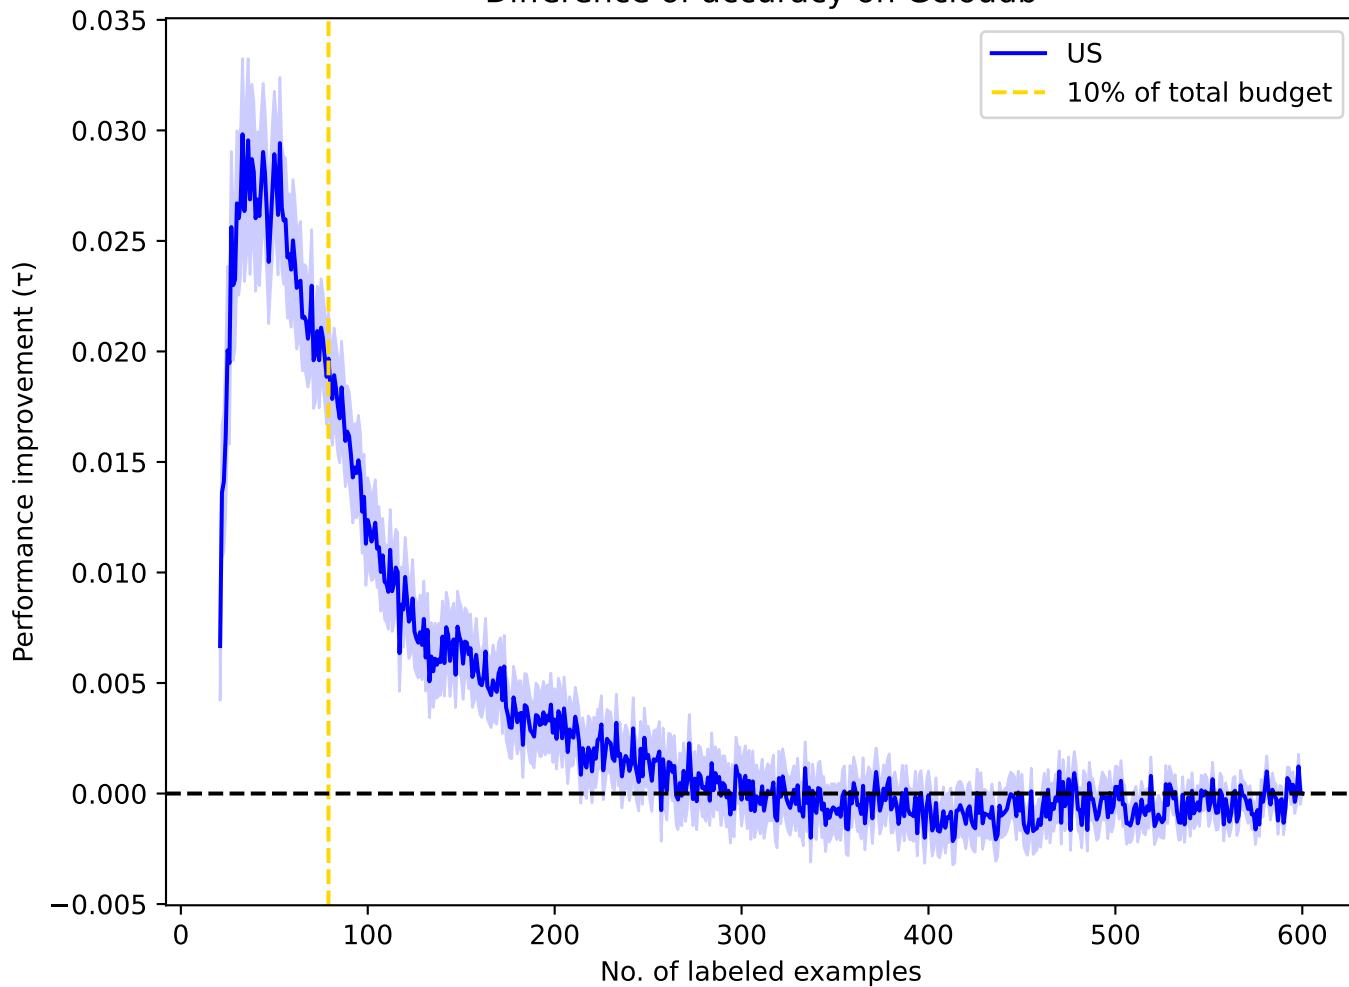

Supplement: supplementary_material [file attachment]

Difference of accuracy on Banana

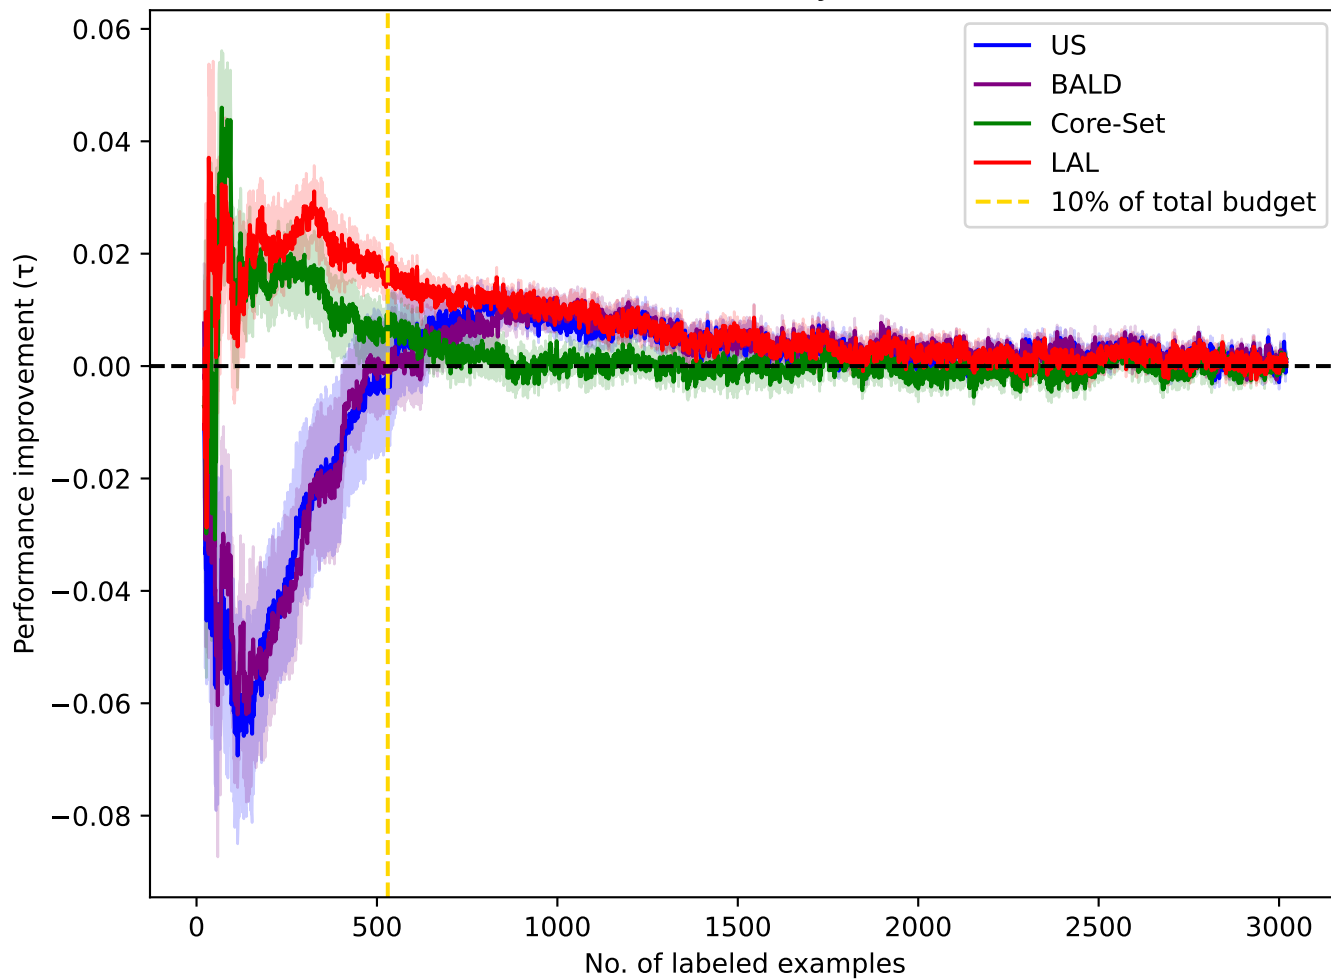

Supplement: supplementary_material [file attachment]

Difference of accuracy on Splice

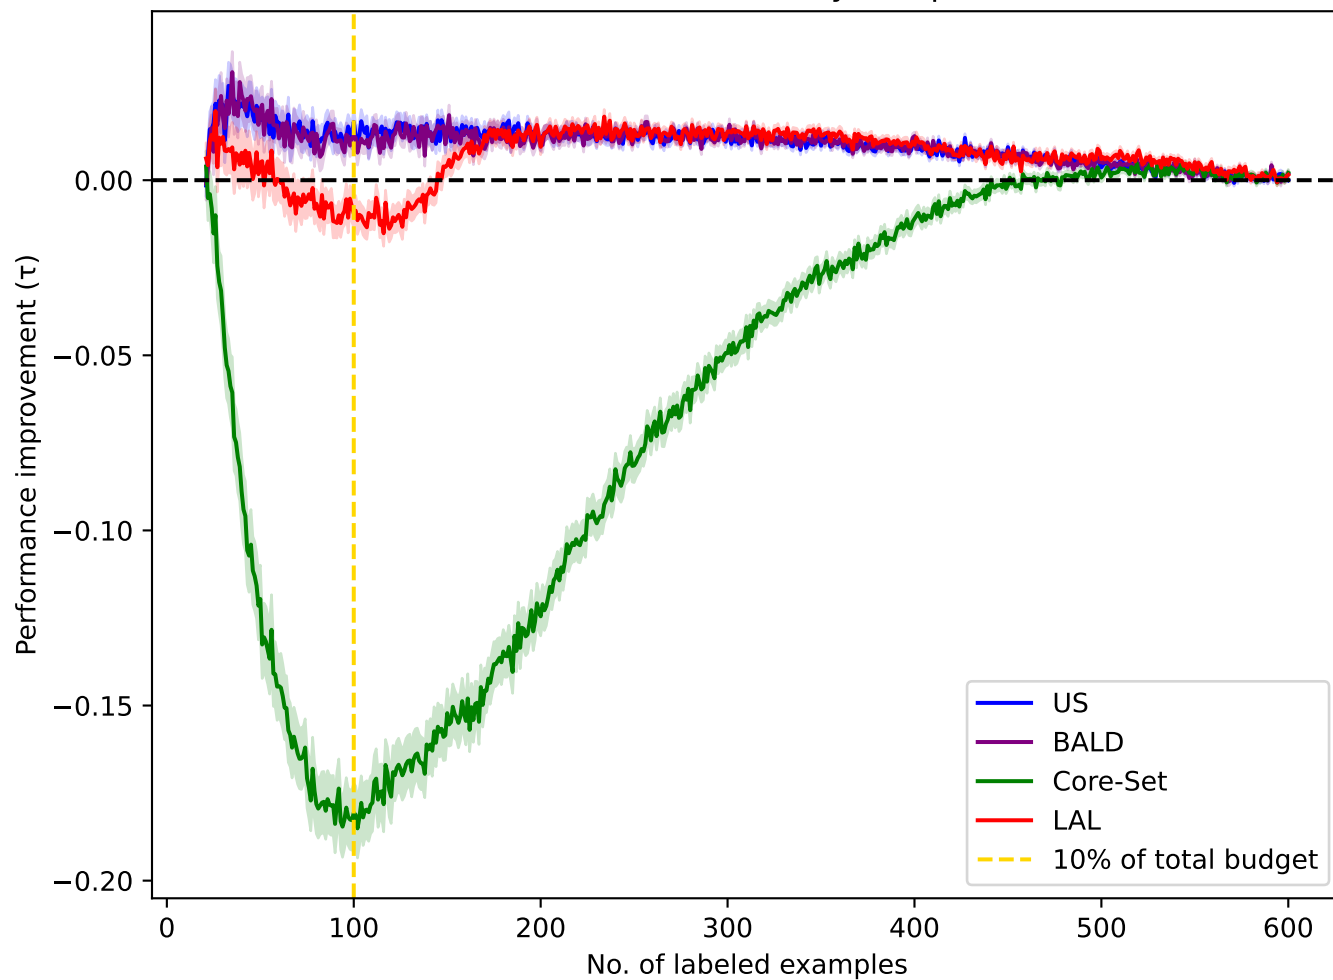

Supplement: supplementary_material [file attachment]

Learning curves with 95% C.I. on German

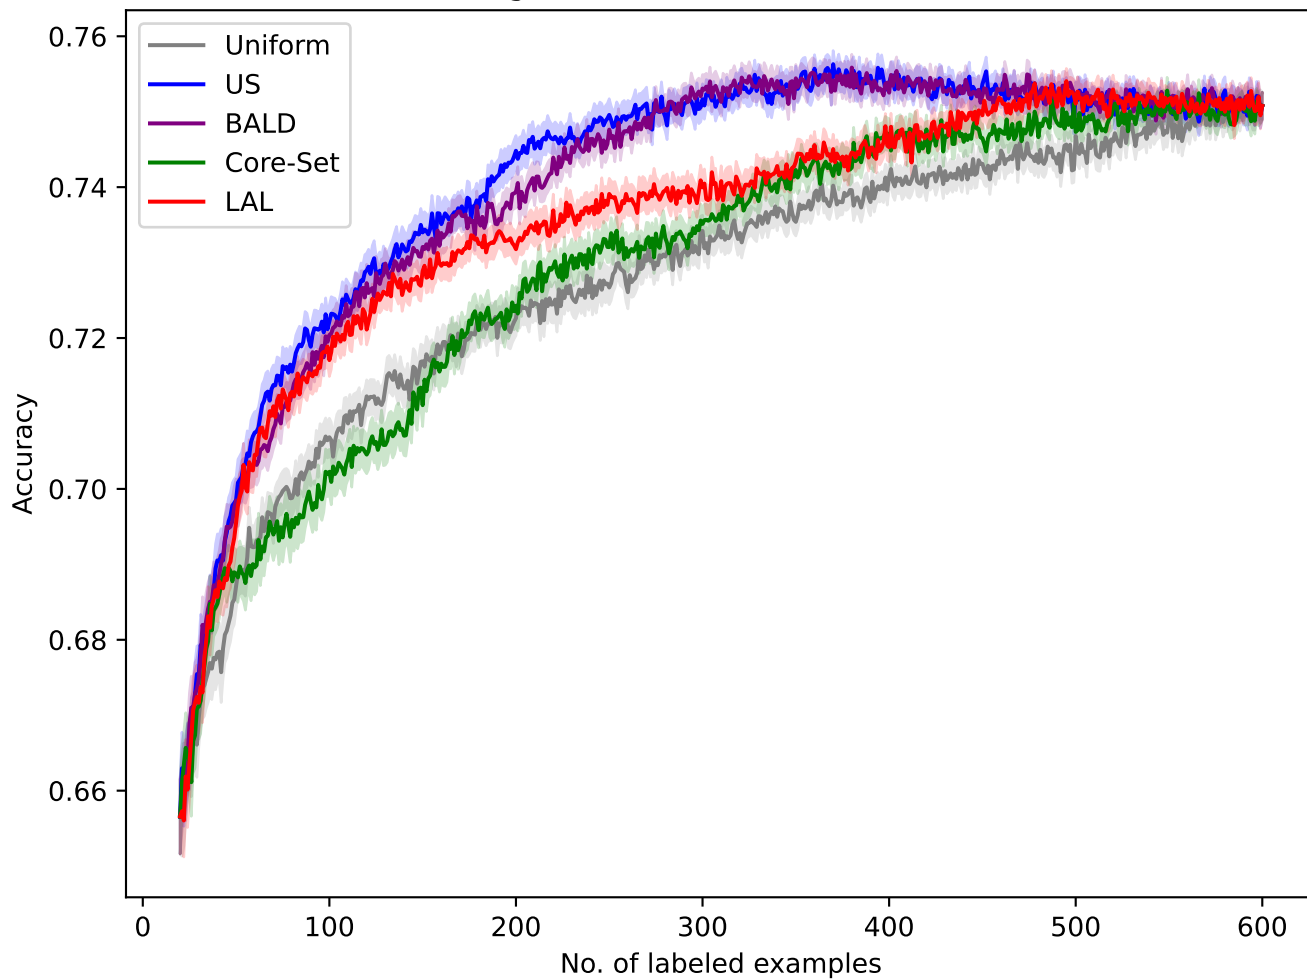

Supplement: supplementary_material [file attachment]

Learning curves with 95% C.I. on Pol

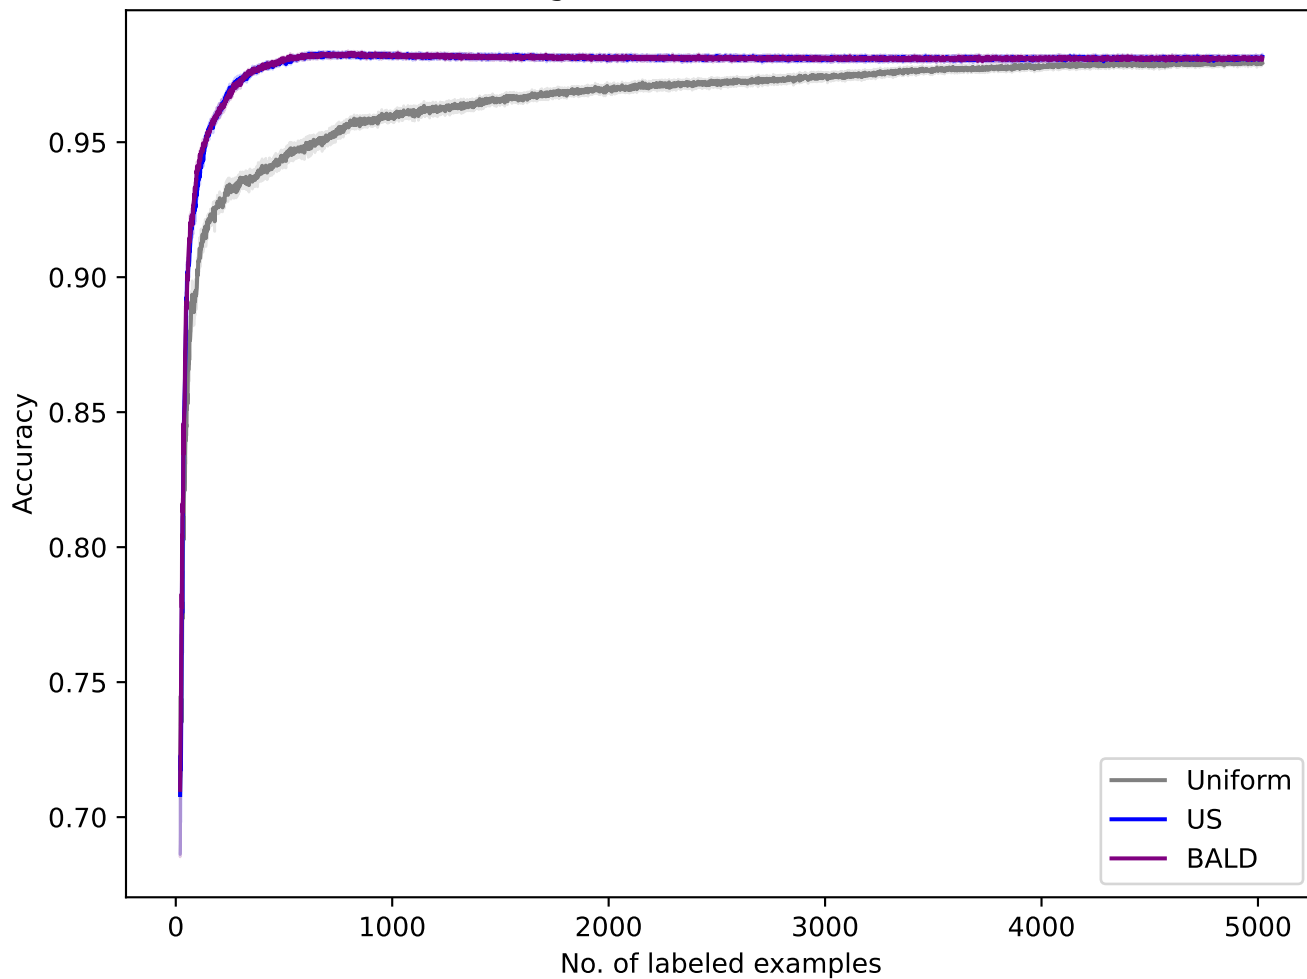

Supplement: supplementary_material [file attachment]

Learning curves on Phishing

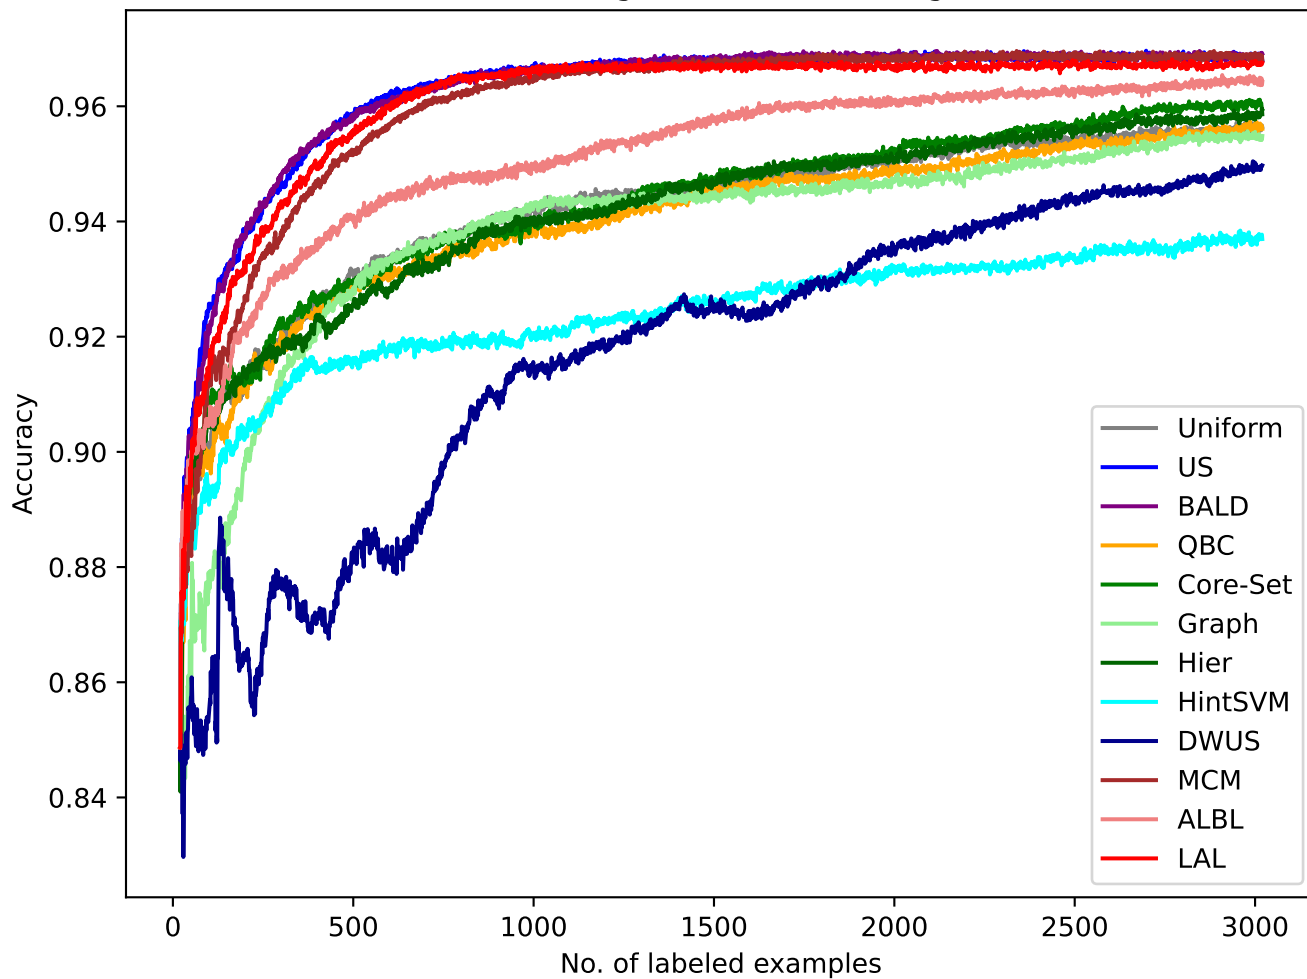

Supplement: supplementary_material [file attachment]

Query strategy aspect

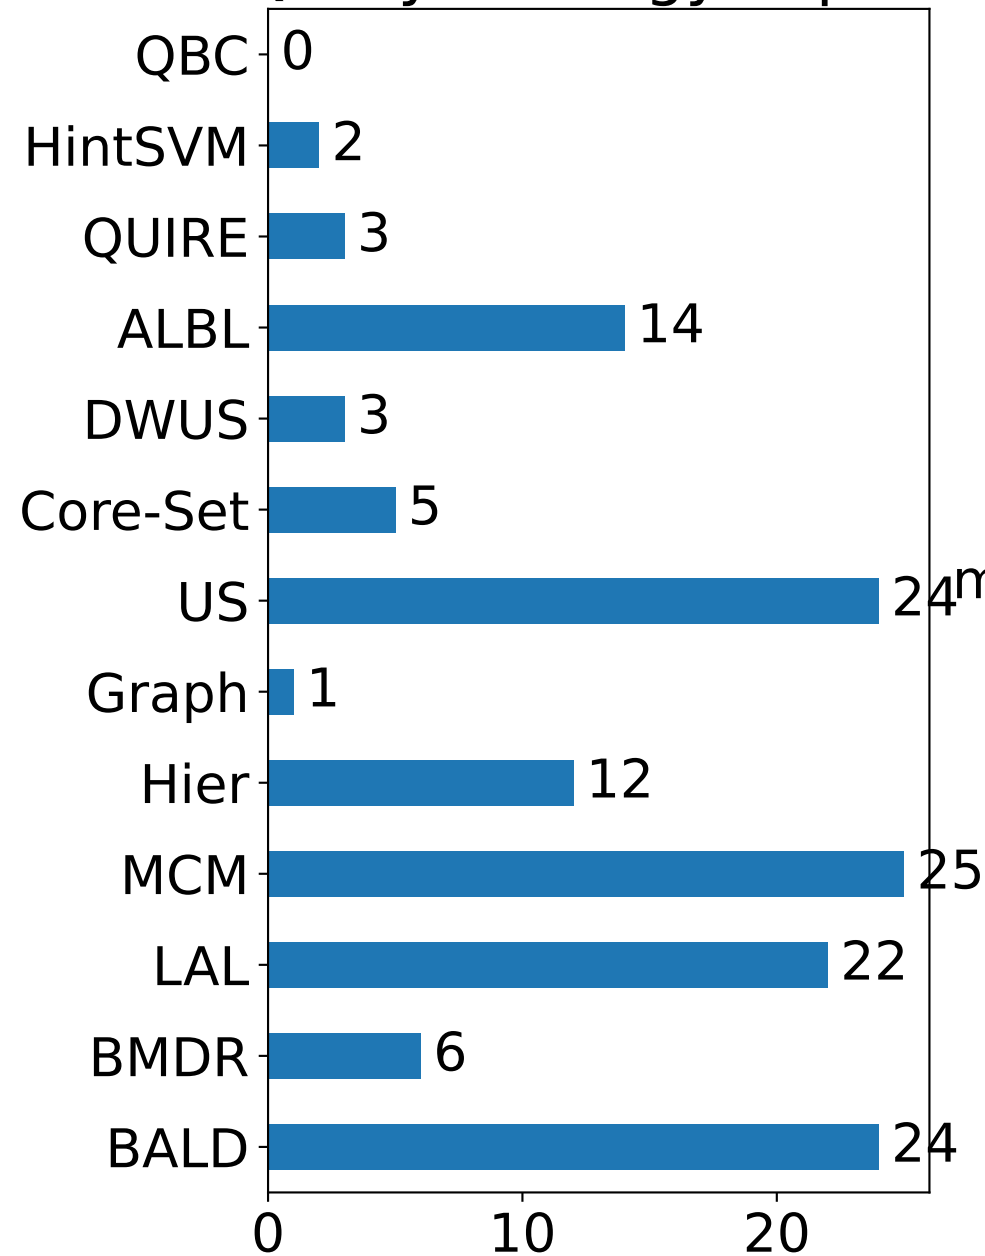

Dataset aspect

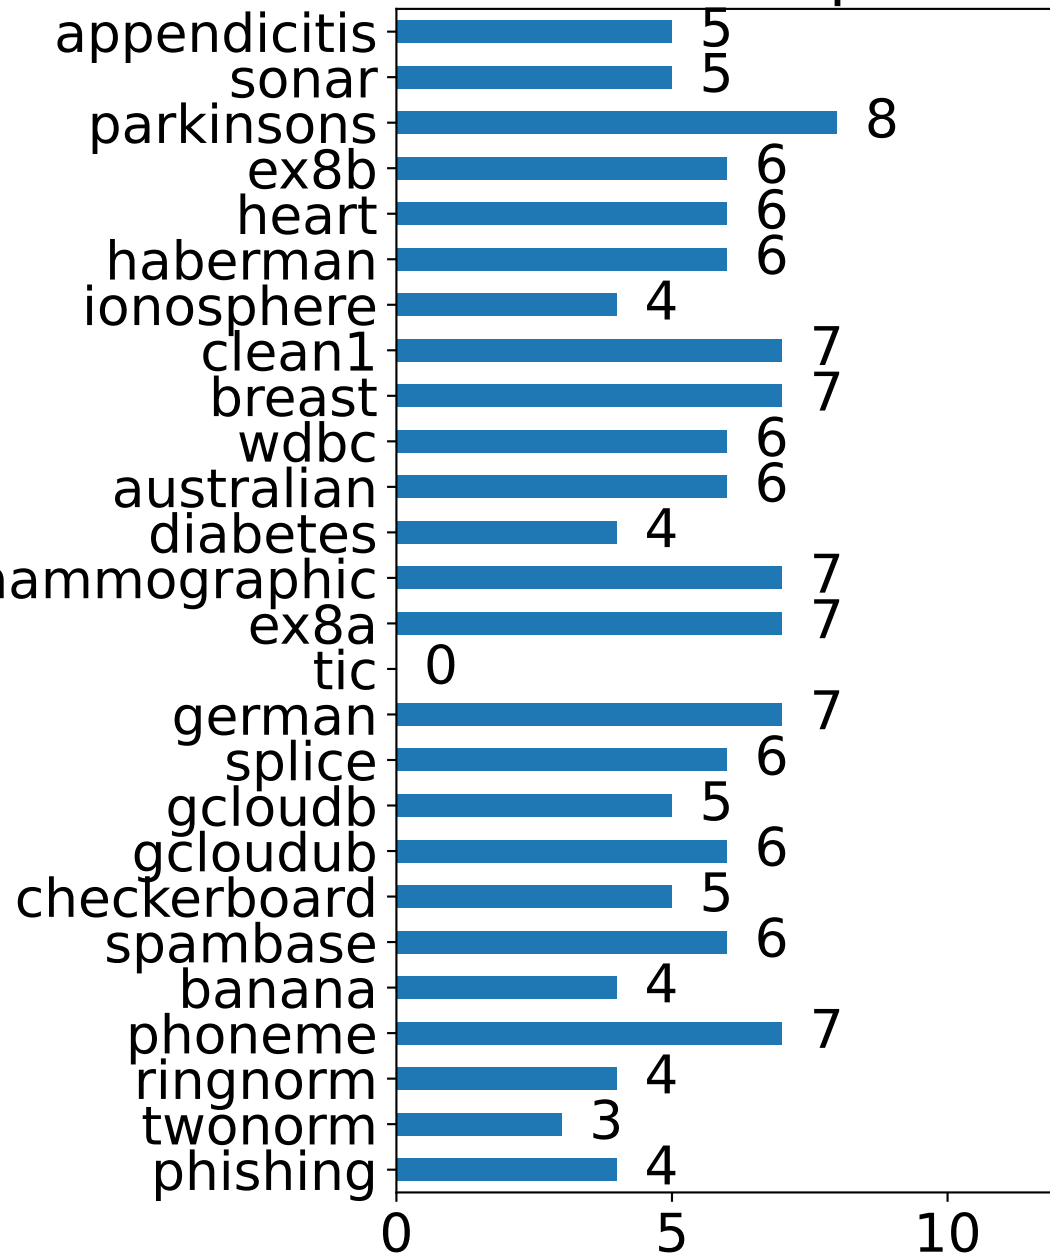

Supplement: supplementary_material [file attachment]

Difference of accuracy on Wdbc

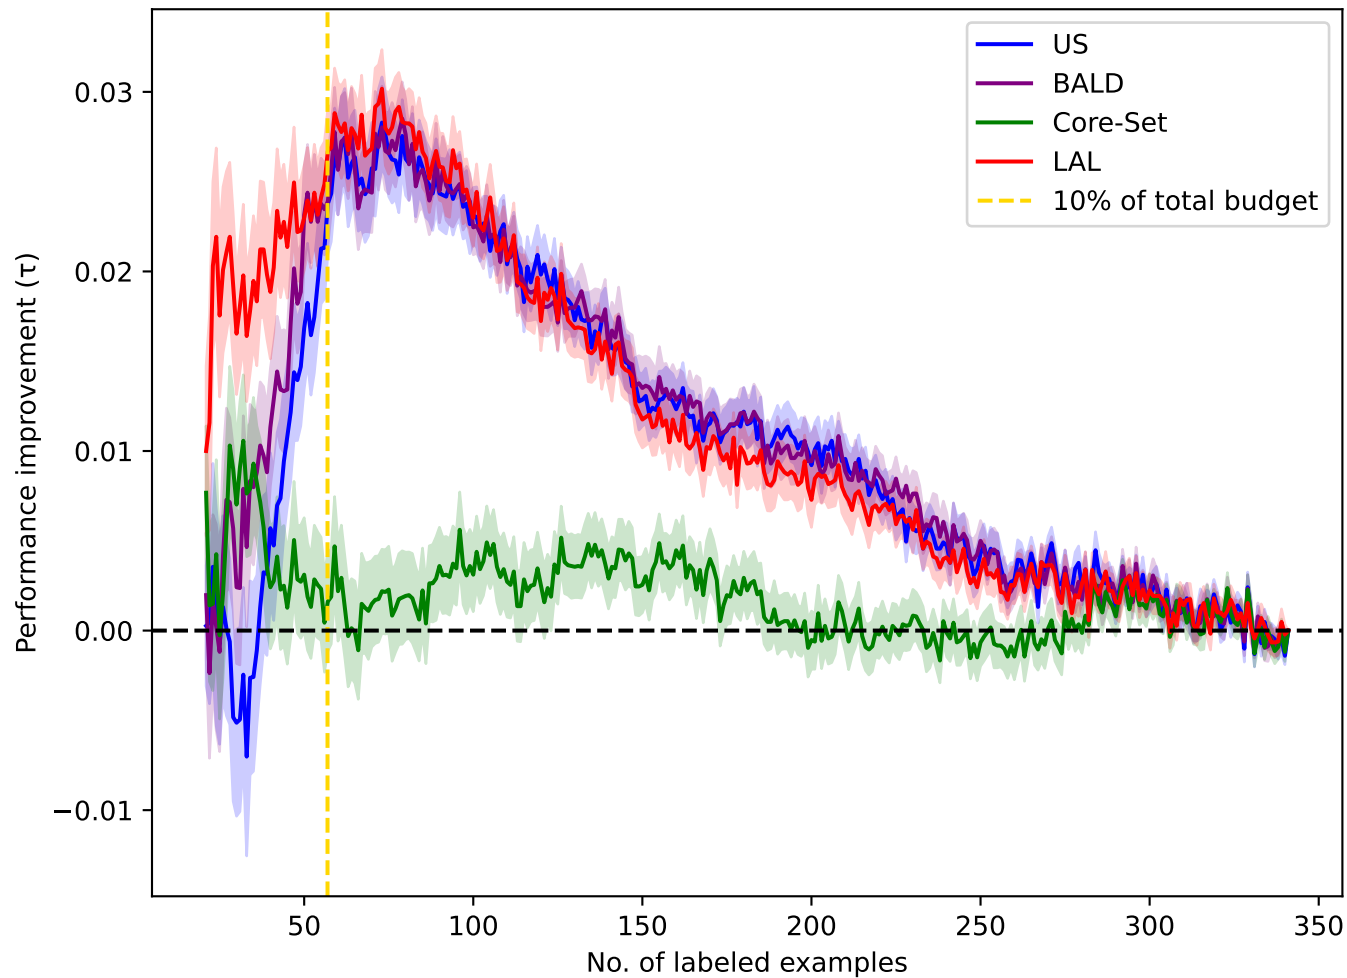

Supplement: supplementary_material [file attachment]

Difference of accuracy on Clean1

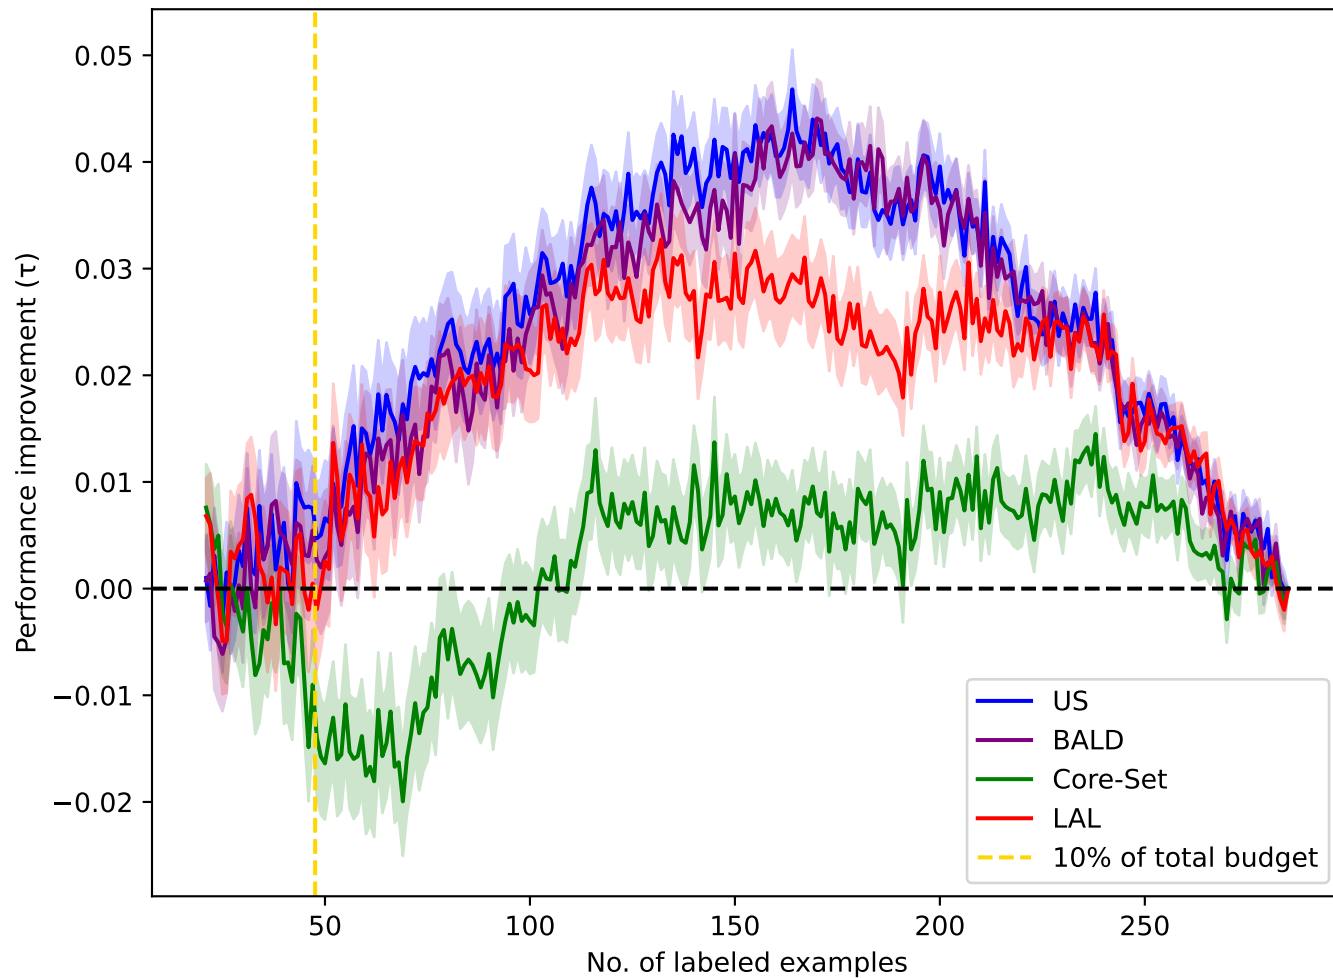

Supplement: supplementary_material [file attachment]

Learning curves with 95% C.I. on Diabetes

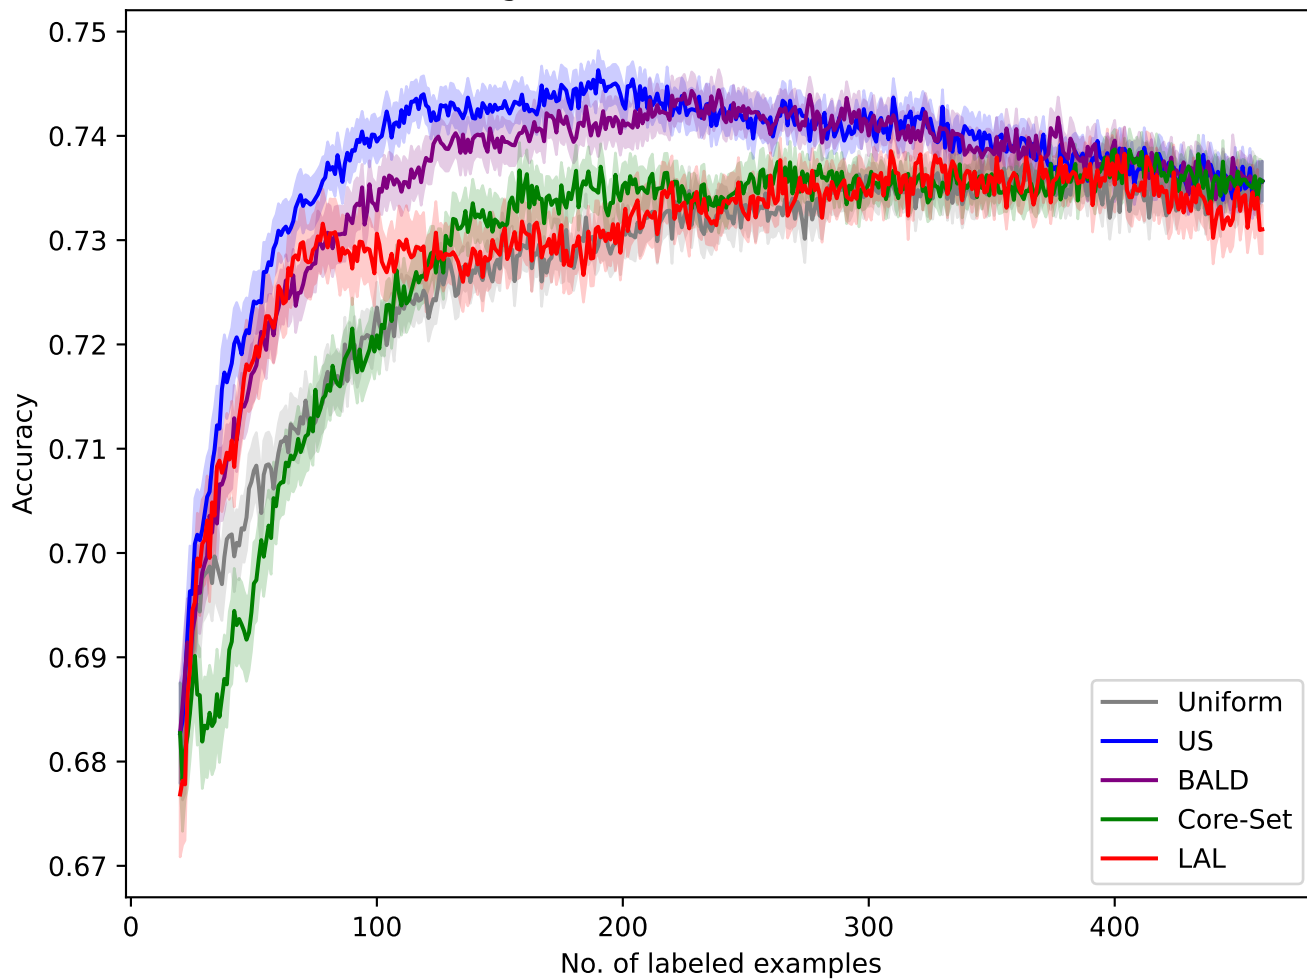

Supplement: supplementary_material [file attachment]

Learning curves on Bioresponse

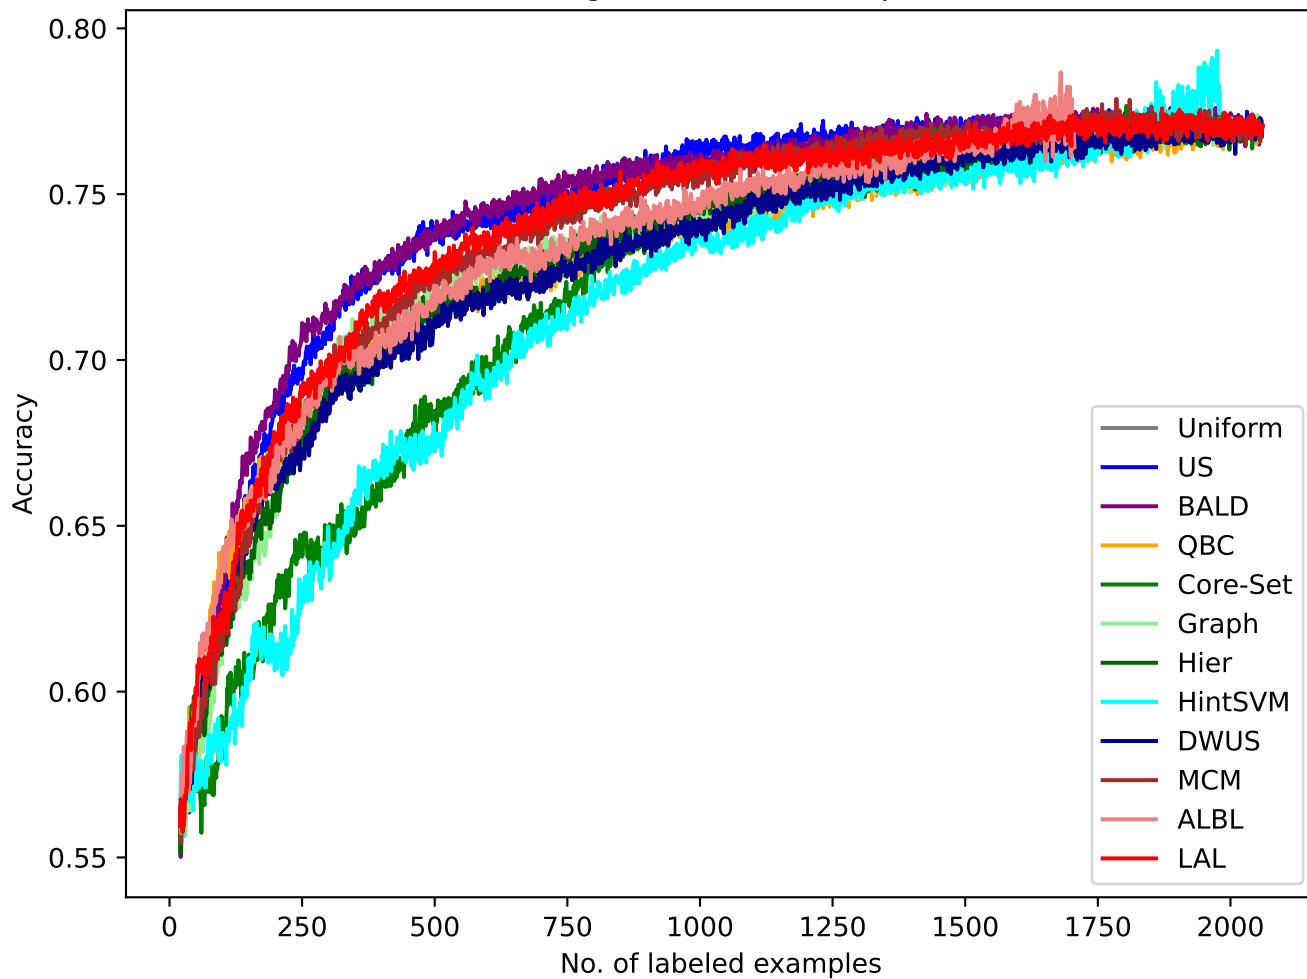

Supplement: supplementary_material [file attachment]

Learning curves on Sonar

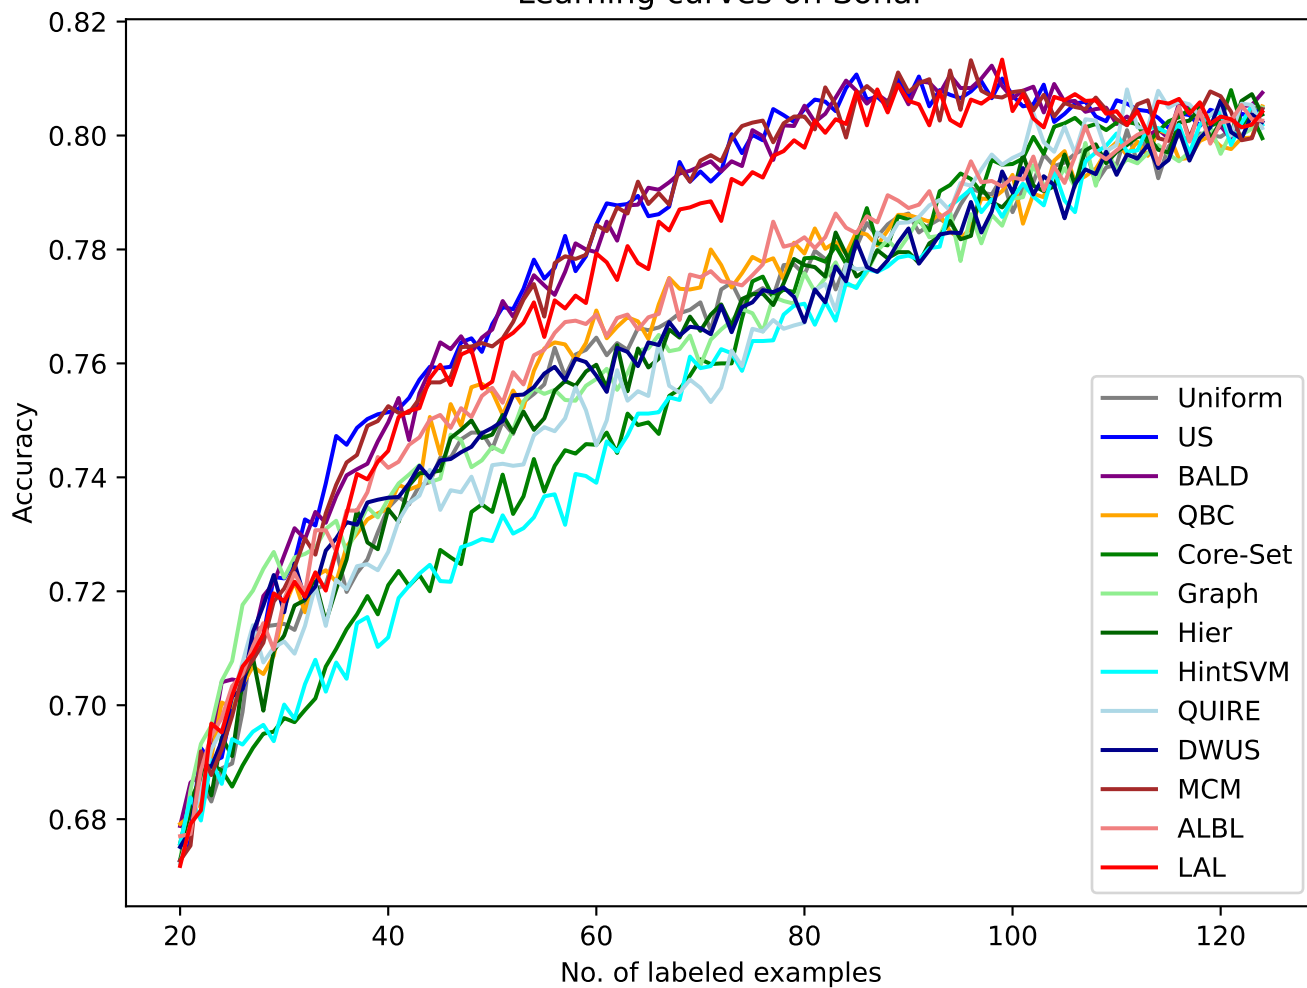

Supplement: supplementary_material [file attachment]
